1 **Country differences in hospitalisation, length of stay and admission to Intensive Care Units**  
2 **due to SARS-CoV-2 infection: a rapid review of available literature**

3

4 Elizabeth A Lane<sup>1,2</sup>, Damien J Barrett<sup>2,5</sup>, Miriam Casey<sup>1</sup>, Conor G. McAloon<sup>3</sup>, Áine B. Collins<sup>1</sup>,  
5 <sup>2</sup>, Kevin Hunt<sup>4</sup>, Andrew W. Byrne<sup>5</sup>, David Mc Evoy<sup>6</sup>, Ann Barber<sup>1</sup>, John Griffin<sup>1</sup>, Patrick Wall<sup>6</sup>  
6 and Simon J. More<sup>1</sup>

7

8 <sup>1</sup>Centre for Veterinary Epidemiology and Risk Analysis, UCD School of Veterinary  
9 Medicine, University College Dublin, Belfield, Dublin D04 W6F6, Ireland;

10 <sup>2</sup>Department of Agriculture, Food and the Marine, Administration Building, Backweston  
11 Campus, Celbridge, Co. Kildare, Ireland;

12 <sup>3</sup>Section of Herd Health and Animal Husbandry, UCD School of Veterinary Medicine,  
13 University College Dublin, Dublin D04 W6F6, Ireland;

14 <sup>4</sup>School of Biosystems and Food Engineering, University College Dublin, Belfield, Dublin  
15 4, Ireland;

16 <sup>5</sup>One Health Scientific Support Unit, Department of Agriculture, Food and the Marine,  
17 Kildare Street, Dublin 2;

18 <sup>6</sup>School of Public Health, Physiotherapy and Sports Science, University College Dublin,  
19 Belfield, Dublin 4, Ireland.

20

21 Running title: Country differences in hospitalisation and length of stay following SARS-CoV-2  
22 infection

23

24 Corresponding author: Elizabeth A Lane

25 Tel: Int-353-01-5058706; Mobile: Int-353-87-2433849

26 Email: [Elizabeth.lane@ucd.ie](mailto:Elizabeth.lane@ucd.ie)

NOTE: This preprint reports new research that has not been certified by peer review and should not be used to guide clinical practice.

27 **Abstract**

28 **Objectives:** Coronavirus disease (COVID-19) caused by the SARS-CoV-2 virus is spreading  
29 rapidly worldwide and threatening the collapse of national health care systems. The  
30 development of effective resource models are critical for long term health planning. The aim  
31 was to evaluate the available literature, to consider parameters affecting hospital resources,  
32 to effectively guide health policy and planning. **Design:** A detailed search of the literature,  
33 using Google Scholar, PubMed, MedRxiv and BioRxiv, was conducted for the time period 01-  
34 DEC-2019 to 04-MAY-2020; using appropriate keywords: resultant articles were scrutinised  
35 in detail, and appraised for reported data pertaining to hospitalization and hospital length of  
36 stay (LOS). **Results:** Disease presentation was described in China; 81 % mild, 14 % moderate  
37 and 5 % severe. The experience, thus far, in Europe and the USA are suggestive of a higher  
38 degree of severity. Initial reports suggest high hospitalisation and ICU admittance rates.  
39 More recent reports from the ECDC lower this estimation. Perhaps the relative age, the level  
40 of pre-existing conditions, and other health factors may be contributors to differences. Data  
41 from Irish cases suggest hospitalisation rate may be lower in parts of Europe and time  
42 dependent. Hospital LOS is described in seventeen articles, with median lengths of stay  
43 between 4 and 25 days. The evidence regarding the LOS in ICU is reported in eighteen  
44 studies, fifteen deemed relevant. The majority of studies report ICU LOS between 7 to 10  
45 days. Many of these studies are likely skewed towards shorter stay due to study cut-off  
46 dates. Indications based on ICU LOS reported for patients continuing care suggest median  
47 ICU stay will be longer. **Conclusions:** These parameter estimates are key to the development  
48 of an effective health care resource model. Based on our rapid appraisal of the literature, is  
49 it essential that Europe manages mitigation measures to ensure that hospital and ICU  
50 capacity does not become overwhelmed to manage this pandemic long term.

51

52 **Keywords:** Hospitalisation, Length of Stay, Hospital stay, ICU, SARS-CoV-2, COVID-19

53

54 **Contents**

55 1. Introduction

56 2. Materials and methods

57 2.1 *Initial study appraisal*

58 2.2 *Study appraisal*

59 2.3 *Data sources and management*

60 3. Results

61 3.1 Hospitalisation rate

62 3.2 Length of stay (LOS)

63 3.2.1 *Length of stay in hospital (non-ICU)*

64 3.2.2 *Length of stay in ICU*

65 3.2.3 *Length of stay pre transfer to ICU*

66 3.2.4 *Length of stay post ICU*

67 4. Discussion

68 4.1 Hospitalisation rate

69 4.2 Length of stay (LOS)

70 5. Limitations of this rapid review

71 6. Conclusions

72 7. Conflict of interest statement

73 8. Funding

74 9. References

75

76

77

78

79 **1. INTRODUCTION**

80 Coronavirus disease (COVID-19) caused by the SARS-CoV-2 virus is spreading rapidly across  
81 the world, threatening the collapse of many national health care systems and exerting a  
82 grave impact on the global economy. As of 9<sup>th</sup> May 2020, data compiled from the European  
83 Centre for Disease Prevention and Control (ECDC) reported 3,898,658 confirmed infections  
84 of COVID-19 cases worldwide with 274,290 deaths recorded. The SARS-CoV-2 virus, first  
85 detected in December 2019, in Wuhan China, has spread to 212 countries and territories. By  
86 9<sup>th</sup> May 2020, European countries, including the European Union (EU)-27, the UK, Norway,  
87 Switzerland and Iceland have reported 1,259,681 cases and 147,085 deaths following  
88 infection with SARS-CoV-2 infection (ECDC, 2020).

89  
90 Clinical presentations of COVID-19 range from asymptomatic to life threatening and fatal  
91 (World Health Organisation (WHO), 2020); Wu and McGoogan (2020) outlined the spectrum  
92 of disease of COVID-19 in China; 81 % were mild; 14 % severe and 5 % critical. The  
93 experience in European countries has differed, and varied among countries. The eight  
94 update Report from the ECDC (2020a) indicates that up to 30 % of diagnosed COVID-19 cases  
95 were hospitalised in some countries. Individual studies from Italy (Cereda et al., 2020;  
96 Grasselli et al., 2020) indicated a higher proportion were accessing ICU care, with 16 and 18  
97 % of all COVID-19 patients being cared for in an ICU setting. However, the European wide  
98 analysis report (ECDC, 2020a) suggests severe illness requiring respiratory support or ICU  
99 care has accounted for 2.4 % cases, the most recent report; the ninth update (ECDC, 2020b)  
100 lowers this estimate (median 2 %).

101

102 Worldwide, age and co-morbidities have been demonstrated as major risk factors for the  
103 development of severe disease (Chen et al., 2020; ECDC, 2020a; 2020b; COVID-19  
104 Surveillance Group , 2020; Gang et al., 2020; Paranjpe et al., 2020; Qian et al., 2020;

105 Richardson et al., 2020; Russell et al., 2020; Wu and McGoogan, 2020). Children are  
106 implicated as possible asymptomatic carriers of SARS-CoV-2 virus and a number of articles  
107 report both symptomatic and asymptomatic infection in children (Chan et al., 2020; Hu et  
108 al., 2020; Korean Society of Infectious Diseases et al., 2020; Liao et al., 2020; Qiu et al., 2020;  
109 Tao et al., 2020; Wu and McGoogan 2020). Many, but not all (Korean Society of Infectious  
110 Diseases 2020), studies indicate a higher proportion of cases are male (Chen et al., 2020;  
111 ECDC, 2020a; 2020b; Fan et al., 2020; Linton et al., 2020; COVID-19 Surveillance Group,  
112 2020; ICNARC, 2020a; 2020b); and recent risk assessments conducted by the ECDC (ECDC,  
113 2020a; 2020b) indicates that males are at higher risk of death compared with their female  
114 contemporaries. Close contact with a case is a risk factor (WHO, 2020), and the basis of public  
115 health advice includes social distancing and staying at home apart from essential activity  
116 (ECDC, 2020a). Bi et al. (2020) reports that household contacts (Odds Ratio 6) and those  
117 travelling with a case were at higher risk of infection (OR 7) than other close contacts. Other  
118 factors, including smoking (Vardavas and Nikitara, 2020) have been highlighted as risk  
119 factors for severe infection. There are indications too that infection rate may be altered by  
120 blood-group (Fan et al., 2020; Zhao et al., 2020).

121

122 The prevention of infection among health care workers is of critical importance to the  
123 management of this pandemic. Of serious concern to policymakers is the clear evidence  
124 indicating that both healthcare workers and hospitalised persons are at particularly high risk  
125 of exposure (WHO 2020; Istituto Superiore di Sanità 2020). Indeed some of the work  
126 conducted early in the epidemic reported hospital-associated transmission of virus was  
127 suspected in 41% of patients (Wang et al., 2020; n= 138). Of concern too, many healthcare  
128 authorities are bringing retired medics and nurses back into service. The placement of these  
129 people considered vulnerable due to their age must be considered. At a national level, the

130 latest work by Stier et al. (2020) emphasizes population density, with attack rates increasing  
131 with city size.

132

133 Preparedness is key and resource matching to clinical requirement essential. Previous work  
134 (Rhodes et al., 2012) suggests a large variation in availability of critical care bed in the EU /  
135 EEA area, ranging from 29.2 in Germany to 4.2 critical care beds per 100,000 population in  
136 Portugal. Perhaps this is key to understanding the difference in coping between different EU  
137 countries. Clearly too, differences will exist between cultures, few western governments will  
138 seek to use hospitalisation as a tool for quarantine. As the infection is spreading across the  
139 world; this rapid review paper considers parameters affecting hospital resources resulting  
140 from infection with SARS-CoV-2 beyond the evidence published from China. The objective is  
141 to evaluate the current scientific literature from across the developed world with the overall  
142 aim to influence health policy and support evidence-based decision-making. The proportion  
143 of patients hospitalized due to infection with SARS-CoV-2 infection is discussed. The  
144 proportion of patients who required critical or ICU care is outlined. Time spent hospitalised;  
145 both in a general and an ICU setting is considered. For those who have been admitted to an  
146 ICU, the length of time pre ICU, the length of time in ICU and the length of time post ICU to  
147 discharge or death was collated from available literature. These estimates are central to  
148 national resource modelling, which are being developed to aid policymakers to ensure  
149 optimal resourcing during this pandemic.

150

## 151 **2. MATERIALS AND METHODS**

### 152 *2.1 Initial study appraisal*

153 This paper follows the Preferred Reporting Items for Systematic Reviews and Meta-  
154 Analyses—Extension for Scoping Reviews (PRISMA-ScR) checklist (Tricco et al., 2018). A  
155 comprehensive search of the scientific literature and national and international government

156 reports was conducted by contributing researchers for the time period 1<sup>st</sup> December 2019 to  
157 4<sup>th</sup> May 2020. The search engines Google Scholar, PubMed, MedRxiv and BioRxiv were used,  
158 using the following keywords: (“Novel coronavirus” OR “SARS-CoV-2” OR “2019-nCoV” OR  
159 “COVID-19”) AND (“length of stay” OR “duration of stay” OR “hospital stay” OR “ICU”). No  
160 restriction on language was imposed as long as the abstract was available in English.  
161 References within these publications were also searched as additional possibilities for  
162 inclusion. Inclusion criteria for ‘the proportion of cases hospitalised’ were papers that  
163 reported the proportion of hospitalised and proportion of those hospitalised accessing  
164 higher level care including critical care and intensive care unit (ICU) care. Inclusion criteria  
165 for ‘length of stay’ (LOS) included articles that reported length of hospital stay, length of stay  
166 in ICU, length of stay prior to admission to ICU, and articles that referenced length of stay  
167 post discharge from ICU to a general hospital setting. Each article was assessed briefly for  
168 suitability for inclusion in this study. Papers that did not report length or duration of time in  
169 hospital or in ICU were discarded. The latest governmental reports from the Health  
170 Protection Surveillance Centre (HPSC), Ireland, and from the Intensive Care National Audit  
171 and Research Centre (ICNARC, 2020a), UK were consulted after the 4<sup>th</sup> May cut-off.

172

## 173 *2.2 Study appraisal*

174 All articles and reports that described the proportion of COVID-19 positive cases  
175 hospitalised, the proportion of cases that were admitted to higher level care including  
176 critical or ICU care, the length of hospital stay or the duration of hospital stay or length of  
177 time in critical care or ICU were scrutinised in detail, and appraised for reported data and  
178 quality of the scientific evidence. Parameter estimates for the length of stay in non-ICU or in  
179 an ICU setting from the relevant articles were recorded and evaluated.

180

181 For quality control, studies were (1) selected from search terms outlined above and initially  
182 screened by three members of the team (*KH, SM and LL*), with parameters identified and  
183 recorded; (2) reviewed and supplemented by manual search by *LL*, again with parameters  
184 identified and recorded. (*iii*) Finally, the review was then internally reviewed by an additional  
185 three members of the team (*SM, DB, MC*), and cross-referenced with other parameter  
186 synthesis documents being developed by the group (*all authors*). Details of the resultant list  
187 ( $n = 179$ ), which included published and pre-printed articles, were entered in an Excel file.

188

189 Eighteen studies relating to hospital LOS and fifteen studies or reports relating to LOS in ICU  
190 were selected for detailed scrutiny as they each reported summary estimates with a  
191 corresponding variance. The Italian report (COVID-19 Surveillance Group, 2020) was the only  
192 report without an estimate of variance that was considered for detailed scrutiny, as the  
193 study population was significant ( $n = 25,452$ ).

194

### 195 2.3 Source data and management

196 Data tabulating the daily number of notified cases and deaths for all countries and  
197 Territories worldwide was downloaded in Excel format from the European Centre for  
198 Disease Prevention and Control (ECDC) and may be accessed at:  
199 [https://www.ecdc.europa.eu/en/publications-data/download-todays-data-geographic-](https://www.ecdc.europa.eu/en/publications-data/download-todays-data-geographic-distribution-covid-19-cases-worldwide)  
200 [distribution-covid-19-cases-worldwide](https://www.ecdc.europa.eu/en/publications-data/download-todays-data-geographic-distribution-covid-19-cases-worldwide). Data was imported into STATA version 14 (STATA  
201 Corporation, USA). Cumulative cases and deaths were generated for each calendar day for  
202 countries of interest, and expressed as a percentage of cumulative deaths to cumulative  
203 cases. The crude mortality rate was expressed as a percentage over time, from day of  
204 outbreak, defined as the day on which the tenth case was reported, in selected European  
205 Countries.

206



207 Data regarding the epidemiological situation in Ireland was extracted from the Health  
208 Protection Surveillance Centre daily epidemiological reports. These may be accessed a:  
209 [https://www.hpsc.ie/a-](https://www.hpsc.ie/a-z/respiratory/coronavirus/novelcoronavirus/casesinireland/epidemiologyofcovid-19inireland/)  
210 [z/respiratory/coronavirus/novelcoronavirus/casesinireland/epidemiologyofcovid-](https://www.hpsc.ie/a-z/respiratory/coronavirus/novelcoronavirus/casesinireland/epidemiologyofcovid-19inireland/)  
211 [19inireland/](https://www.hpsc.ie/a-z/respiratory/coronavirus/novelcoronavirus/casesinireland/epidemiologyofcovid-19inireland/). Data were entered into Excel, then imported into STATA 14 to generate the  
212 trends in cumulative cases, percentage of known cases hospitalised and the percentage of  
213 confirmed cases admittance into ICU over time.

214

### 215 **3. RESULTS**

#### 216 **3.1 HOSPITALISATION RATE**

217 A summary of available scientific literature from the outbreaks worldwide relating to the  
218 proportion of COVID-19 cases requiring hospitalisation and the need for stepped up medical  
219 care, including critical care and ICU, by country, is presented in Table 1. Data from 33 studies  
220 or reports are presented.

221

222 << Insert Table 1 here >>

223

224 *European Centre for Disease Prevention and Control (ECDC updates)*

225 The European Centre for Disease Prevention and Control (ECDC) collates the laboratory-  
226 confirmed cases reported to the European Surveillance System (TESSy) and thus far has  
227 published nine update reports as the situation unfolds across Europe (ECDC, 2020a; 2020b).  
228 Preliminary estimates of severity were collated based on the analysis of data from EU and  
229 EEA countries and from the UK. As expected some data were incomplete or missing in TESSy.  
230 The eight update (ECDC, 2020a) indicates that 48,755 of 152,375 (32 %) were hospitalised  
231 based on data from 26 European countries; with a country median 28 % (IQR 14 to 63 %).  
232 Severe presentations that required ICU and or respiratory support accounted for 2,859 of

233 120,788 (2.4 %) cases from 16 countries; median 1.4 % (IQR 0 to 33 %). Among hospitalized  
234 cases only, severe illness was reported in 3,567 of 38,960 (9.2 %) cases from 19 countries,  
235 median 15 % (IQR 3.8 to 35 %). Death occurred in 1,005 of 9,368 (11 %) of hospitalized cases  
236 from 21 countries (3.9 %, IQR 0 to 13 %). Age-specific risk increased among those 60 years  
237 and older, thus consideration to age profile within a country is important. The latest report  
238 on 23<sup>rd</sup> April reported increased rate of hospitalisation with a pooled estimate of 42 %  
239 (160,485 of 381,410 cases); based on data from 19 countries, however the country median  
240 was 28 % (IQR 16 to 39 %). Severe presentations that required ICU and or respiratory  
241 support accounted for 5,456 of 220,412 (2 %) cases with data from 14 countries; median 2 %  
242 (IQR 0 to 4 %). Again, hospitalisation increased with age, and for males from 30 years. The  
243 changes over time in the crude mortality rate for all notified cases since day of outbreak,  
244 defined as the day on which the tenth case was notified, for selected European countries is  
245 presented in Figure 1.

246

247 << Insert Figure 1 here >>

248

#### 249 *USA Studies*

250 Admission rates to ICU in the USA varied between 4.9 to 11.5 % (CDC COVID-19 Response  
251 Team, 2020) report. Myers et al. (2020) indicated 8.7 % ICU admission in a study conducted  
252 in California in March. While Lewnard et al., (2020) observed a higher ICU admission rate  
253 (25.6 %) also in California. A number of studies conducted in New York outlined ICU  
254 admission rates of 14.2 % (Richards et al., 2020); 22 % (Cummings et al., 2020); 23.6 %  
255 (Argenziano et al., 2020); and 36% (Paranjpe et al., 2020). Of significance, are the mortality  
256 rates in hospitalised groups (and specifically not ICU only groups) reported in a number of US  
257 studies: 15.4 % Lewnard et al., (2020); 15.6 % Myers et al., 2020; 21 %; Richards et al., 2020;  
258 21 %; Argenziano et al., 2020; and 29 % Paranjpe et al 2020.

259

260 In Ireland, the proportion of COVID-19 test positives cases (confirmed cases) hospitalised is  
261 reducing with time (Figure 2). Daily epidemiology reports compiled by the Health Protection  
262 Surveillance Centre (HPSC, 2020a) with data to March 30<sup>th</sup> reports a hospitalisation rate of  
263 27.9 % (834 of 2,990 cases hospitalised) and admission to ICU in 4.2 % of cases (126 of  
264 2,990). The hospitalisation rate reduced over time to 17.5 % (1,968 of 11,261) by April 13<sup>th</sup>  
265 (HPSC, 2020b); 13.5 % (2,669 of 9,723) by 29<sup>nd</sup> April (HPSC, 2020c); and 13.1 (2,878 of 21,908  
266 cases by 4<sup>th</sup> May (HPSC, 2020d). The rate of admission to ICU reduced, concomitantly, from  
267 4.2 % of cases (126 of 2,990; HPSC 2020a) to 1.7 % (373 of 21,908; HPSC 2020d) of cases by  
268 May 4th. The reports collated by the HPSC (HPSC Epi Team, 2020) in Ireland indicate that  
269 proportion of hospitalisations and transfer to ICU increased occurred with age.

270

271 << Insert Figure 2 here >>

272

### 273 **3.2 LENGTH OF STAY (LOS)**

#### 274 *3.2.1 Length of stay in hospital (Non-ICU)*

275 A summary of the literature pertaining to length of hospital stay in non-ICU settings due to  
276 COVID-19, by country, is reported in Table 2. The overall length of hospital stay is reported in  
277 eighteen studies or reports, with overall median lengths of stay between four days and  
278 twenty-five days. Figure 3 illustrates the median (and IQR) ranges of hospital length of stay  
279 for relevant articles.

280

281 << Insert Table 2 here >>

282

283 << Insert Figure 3 here >>

284

285 *3.2.2 Length of stay in ICU*

286 The literature pertaining to length of ICU stay due to COVID-19 is reported in Table 3,  
287 including eighteen studies and reports. Figure 4 illustrates the median (and IQR) ranges of  
288 length of stay in ICU for relevant articles. In this figure, fifteen studies are presented; Three  
289 case studies were excluded due to small numbers of relevant cases (Chen et al., 2020;  
290 Kujawski et al., 2020; Young et al., 2020). Median lengths of stay in ICU between 7 to 10 days  
291 were observed in studies based in China (Cao et al., 2020; Fan et al., 2020; Yang et al.,  
292 2020; Zhou et al., 2020). European studies conducted by Graselli et al. (2020) in Italy, Ceruti  
293 et al (2020) in Switzerland, and the ICNARC report (2020a) report similar LOS between 7 to  
294 10 days. Earlier reports from the ICNARC (2020b) indicated shorter LOS for ICU patients,  
295 indicating the bias towards shorter stay as fewer patients had progress through their  
296 complete stay. However median LOS outlined by studies based in North America were more  
297 variable and reported lengths of stay between 3.5 to 23 days for various groups (Figure 3).

298

299 << Insert Figure 4 here >>

300

301 << Insert Table 3 here >>

302

303 *3.2.3 Length of hospital stay prior to transfer to ICU*

304 Length of hospital stay prior to transfer to ICU due to COVID-19, by country, is presented in  
305 Table 4. Four studies made reference to time in hospital prior to ICU transfer, including two  
306 small case series (Young et al., 2020; Kujawski et al., 2020). A long median hospital stay prior  
307 to transfer to ICU was described by Fan et al. (2020; median 8 days, IQR 4 to 11 days). The  
308 UK ICNARC report (ICNARC 2020a) details a median length of stay of one day (IQR 0 to 3  
309 days); indicating the short duration before stepped up care need is identified in COVID-19  
310 patients.

311

312

313 << Insert Table 4 here >>

314

315 *3.2.4 Length of hospital post ICU*

316 No eligible studies outlining the length of stay post discharge from ICU were discovered.

317

318

## 319 **4. DISCUSSION**

### 320 **4.1 HOSPITALISATION RATE**

321 The relative variation in disease severity is very clear in the published literature from China;

322 81 % mild presentation, 14 % moderate presentation with 5 % severe or critical

323 presentations that require high-level on-going care in critical care beds or within the ICU

324 environment (Wu and Grogan, 2020). Nevertheless, the experience, thus far, in Europe and

325 the USA would suggest some countries are experiencing a higher degree of severity of

326 COVID-19 being reported. Early indications from Italy suggested hospitalisation rates of 30 %

327 and admission to ICU between 16 to 18 % (Cereda et al., 2020; Graselli et al., 2020). While

328 the eight update report from the ECDC (ECDC 2020a) restates this but suggests based on

329 data from 16 EU countries that respiratory and or ICU support is needed in 2.4 % of cases;

330 the latest ECDC report (ninth Update; ECDC 2020b) revises this slightly country specific

331 median 2 % (IQR 0 to 4 %). Studies conducted in the USA too report high rates of

332 hospitalisation (CDC COVID-19 Response Team, 2020), high proportion of patients admitted

333 to ICU care and very high mortality rates (Argenziano et al, 2020; Cummings et al., 2020;

334 Lewnard et al., 2020; Myers et al., 2020; Paranjpe et al., 2020). The cause of the differences

335 in disease presentation between countries is not clear. Perhaps differences in case

336 definition, the relative age of the population, the level of pre-existing conditions within the

337 population, and other health factors may be contributing to these differences. Given the  
338 experience in Italy, thus far, suggests that must carefully manage mitigation measures to  
339 ensure ICU capacity is not reached or breached. However, another major influencer on  
340 hospitalisation rate will be the definition of a suspect case and the extent of COVID-19  
341 testing within the community; the detection of a greater number of milder cases, diagnosed  
342 within the community will ultimately influence the hospitalisation rate. The influence of  
343 community testing is becoming evident in Ireland; as April progresses, it is clear in each  
344 subsequent HPSC report (2020a; 2020b; 2020c; 2020d) that the rate of hospitalisation and  
345 proportion of patients admitted to ICU is reducing. This is evidence perhaps that a broader  
346 case suspect definition and a wider testing approach will impact the overall rate of  
347 hospitalisation and admission to ICU.

348

## 349 **4.2 LENGTH OF STAY (LOS)**

### 350 *4.2.1 Length of stay in hospital (Non-ICU)*

351 The overall length of hospital stay varied between 4 and 25 days among studies; two of  
352 these studies were case series based on the observations of 10 (Lo et al., 2020) or 12  
353 (Kujawski et al., 2020) patients, a further article (Linton et al., 2020) was based on data  
354 extracted from publically available datasets. The studies are very diverse in their reporting  
355 and presentation of hospital length data. The largest study is an Italian report (Istituto  
356 Superiore di Sanità, 2020) reporting the median hospital stay of 5 days for cases that did not  
357 require ICU level of care. However, no range or confidence interval is described by this  
358 report. Similar to the shorter duration of hospital stay in Italy, a more recent study  
359 conducted in the USA, which examined hospital records of 5,700 sequential admissions to  
360 New York hospitals, reported a short length of stay, median 4.1 days (IQR 2.3 to 6.8). The  
361 hospital length of stay varies dramatically among different studies. Perhaps differences in  
362 hospital capacity, overcrowding, government policy, funding source and other factors might

363 influence length of stay. Of interest Richardson et al. (2020) indicates 45 patients were re-  
364 admitted to hospital for further care, indicating perhaps the pressure on bed availability.  
365 Argenziano et al. (2020) outlines the critical situation faced in some Emergency Departments  
366 in New York and describes the death of 14.7 % of ED only patients; patients who died in the  
367 emergency room prior to being admitted to hospital. Given the large variation in length of  
368 stay and the difference between continents; the studies relating to hospital LOS outside an  
369 ICU setting were not appropriate to use to calculate a central tendency.

370

#### 371 *4.2.2 Length of stay in hospital (ICU)*

372 Studies from China (Cao et al., 2020; Fan et al., 2020; Yang et al., 2020; Zhou et al., 2020)  
373 report median ICU stays of 7 to 10 days. Similar median lengths of stay have been reported  
374 in Italy. The Italian report (COVID-19 Surveillance Group, 2020) dated 29<sup>th</sup> April 2020  
375 describes median LOS of 8 days if admitted to an ICU setting (n = 25,452); however, actual  
376 length of time in ICU and proportion or number of patients cared for in ICU were not  
377 specified. Important too, to note, this report while including a large number of cases, only  
378 includes those who have died, and hence will not reflect the possible longer stay of  
379 survivors. Another Italian study conducted by Grasselli et al. (2020b) reports the median  
380 length of ICU stay was 9 days (IQR 6 to 13 days) for 1,581 patients. A Swiss study, too,  
381 outlined the median length of stay was 9 days for 41 patients followed to discharge (Ceruti  
382 et al., 2020). It is noticeable that length of ICU stay is more variable in US studies. In  
383 particular studies that breakdown length of stay into those completed stay compared to  
384 patients continuing care. It is evident that care must be taken with interpretation, continuing  
385 care groups are reported to have longer stays; median LOS of 11.4 (Petrilli et al., 2020); 14  
386 (Bhatraju et al., 2020); and 23 days (Argenziano et al., 2020) are outlined. A smaller case  
387 series conducted by Valente-Acosta in Mexico highlights this continuing care group; this  
388 study describes a case series of 33 patients admitted to ICU in Mexico city, the median LOS

389 of 23 days is indicative that LOS in ICU can be significant; although their continuing care  
390 group is only n = 4. The authors of the UK ICNARC (2020a) report clearly highlight the  
391 influence of bias towards shorter stay; with both survivor and non-survivor groups reported  
392 to have a median LOS of 8 days (ICNARC, 2020a). Indeed earlier reports from INCARC  
393 (2020b) reported shorter LOS of ICU patients, as fewer persons had progressed through to  
394 completion of treatment. It is evident that study cutoff, and short follow ups, have  
395 influenced reported ICU LOS; it is clear that the influence of continuing care groups will  
396 lengthen length of ICU stay somewhat in time.

397

#### 398 *4.2.4 Length of hospital stay prior to transfer to ICU*

399 A long hospital stay (median 8 days, IQR 4 to 11 days) was reported by Fan et al., (2020) prior  
400 to transfer to ICU, some of whom were diagnosed based on clinical findings. Given the  
401 timing of the study so early in the outbreak and the lack of consistency regarding the  
402 diagnosis, these data should be discounted when considering future resources. Only the UK  
403 ICNARC report (2020a) details useful data pertaining to length of hospital in Europe. Median  
404 length of hospital stay pre admission to ICU for laboratory confirmed COVID-19 patients (n =  
405 8,233) was 1 day (IQR 0 to 3 days), indicating the short duration before stepped up care  
406 need is identified in COVID-19 patients.

407

408 Length of stay post ICU is illustrated in a figure in some small case series; and as such, were  
409 data were not extracted for reporting or discussion in this review.

410

## 411 **5. STUDY LIMITATIONS**

412 Limitations associated with any rapid review are pertinent to this study. A narrow aim was  
413 set, namely to determine rate of hospitalisation and the length of stay in hospital due to  
414 COVID-19 infection in countries across the world now at the centre of the pandemic. The



415 sources of the literature may be limited by the time-limited constraint of gathering relevant  
416 literature (less than five weeks). However, this rapid approach was necessary, given the aim  
417 was to provide evidence-based estimates of length of hospital stay to steer policy and  
418 provide parameter estimates for utilisation within a hospital resource model. Inclusion of  
419 articles in this review was assessed based on the subject being reported in the article and if  
420 the numbers of cases were considered relevant. Another shortcoming was some of the  
421 available literature is in pre-print form and only undergoing peer review.

422

## 423 **6. CONCLUSIONS**

424 Differences in the severity of case presentations have been described between continents;  
425 and Ireland should base its expectation on those cases observed in Europe thus far in the  
426 pandemic. Advice from the ECDC suggests hospitalisation rates of up to 42 % can be  
427 expected. Additionally, we must expect increased level of care requirements, to critical care  
428 and ICU levels, in up to 3 % of cases to allow for spare capacity, as mitigation measures are  
429 relaxed in our jurisdiction. There is no doubt that the case definition in use and the  
430 availability of community testing will determine the hospitalisation rate within a country. In  
431 countries where community testing has been significant, we can expect the rate of  
432 hospitalisation and the proportion requiring ICU level care to be lower. Preliminary data in  
433 Ireland certainly supports this assertion.

434

435 The length of stay in hospital outside of the ICU setting, due to COVID-19 is highly variable in  
436 the literature, with median estimates varying from 4 to 25 days. Studies diverged in their  
437 inclusion criterion. It is likely that the aim of hospitalisation varied among countries.  
438 Discharge criteria is divergent in different jurisdictions, whether it related to a patient  
439 required to test negative prior to discharge or where there was pressure to free up

440 overcrowded hospitals. Indeed it is likely that some countries used hospitalisation to ensure  
441 quarantine.

442

443 As the pandemic spreads rapidly throughout the world, more and more evidence regarding  
444 the length of stay in ICU following COVID-19 is reported. Many of these reports indicate a  
445 median ICU length of stay between 7 to 10 days; however a number of these studies report  
446 length of stay based only on resolved cases, and as such duration of stay it is likely skewed  
447 towards a short stay due to bias towards those who have completed their ICU stay and are  
448 now discharged or have died. Thus the upper estimates of the range should be considered  
449 for use in resource models. It is apparent too that the data generated by each individual  
450 country during the initial months of the outbreak will be critical to estimate the parameters  
451 used for any national resource model.

452

453 *Word count 4400*

454

## 455 **7. CONFLICT OF INTEREST STATEMENT**

456 The authors do not have a financial or personal relationship with other people or  
457 organisations that could inappropriately influence or bias the content of the paper.

458

459

## 460 **8. FUNDING**

461 All authors were employed through their home institutions. No additional funding was  
462 used.

463

464

## 465 **9. REFERENCES**

- 466 Argenziano MG, Bruce SL, Slater CL, Tiao JR, Baldwin MR Barr RG, Chang BP, Chau KH, Choi  
467 JJ, Gavin N, Goyal P, Mills AM, Patel AA, Romney M-LS, Safford MM, Kuiper JJ, Schluger  
468 NW, Sengupta S, Sobieszczyk ME, Zucker JE, Asadourian PA, Bell FM, Boyd R, Cohen MF,  
469 MacAlistair I, Colville LA, de Jonge JA, Dershowitz LB, Dey SA, Eiseman KA, Girvin ZP,  
470 Goni DT, Harb AA, Herzik N, Householder S, Karaaslan LE, Lee H, Lieberman E, Ling A, Lu  
471 R, Shou AY, Sisti AC, Snow ZE, Sperring CP, Xiong Y, Zhou HW, Natarajan K Hripcsak G,  
472 Chen R. 2020. Characterization and clinical course of 1000 patients with COVID-19 in  
473 New York: retrospective case series. MedRxiv preprint.  
474 **doi:** <https://doi.org/10.1101/2020.04.20.20072116>
- 475 Badawi O, Liu X, Berman I, Amelung PJ, Doerfler M, Chandra S. 2020. Impact of COVID-19  
476 pandemic on severity of illness and resources required during intensive care in the greater New  
477 York City area. **doi:** <https://doi.org/10.1101/2020.04.08.20058180>. PrePrint
- 478 Barrasa H, Rello J, Tejada S, Martin A, Balzikueta G, Vinuesa C, Fernandez Miret B, Villagra A,  
479 San Sebastian A, Cabenes S, Iribarren S, Fonseca F, Maynar J, and the Alana COVID19  
480 Study Investigators. 2020. SARS-Cov-2 in Spanish Intensive Care: Early Experience with  
481 15-day Survival In Vitoria. *Anaes Crit Care Pain Med*. ePUB ahead of print. doi:  
482 [10.1016/j.accpm.2020.04.001](https://doi.org/10.1016/j.accpm.2020.04.001)
- 483 Bhatraju PK, Ghassemieh BJ, Nickols M, Kim R, Jerome KR, Nalla AK, Greninger AL, Pipavath  
484 S, Wurfel MM, Evans L, Kritek PA, West TE, Luk A, Gerbino A, Dale CR, Goldman JD,  
485 O'Mahony S, Mikacenic C. 2020. Covid-19 in Critically Ill Patients in the Seattle Region —  
486 Case Series. *NEJM* DOI: [10.1056/NEJMoa2004500](https://doi.org/10.1056/NEJMoa2004500)
- 487 Bi et al., Epidemiology and Transmission of COVID-19 in Shenzhen China: Analysis of 391  
488 cases and 1,286 of their close contacts. <https://doi.org/10.1101/2020.03.03.20028423>
- 489 Borobia AM, Carcas AJ, Arnalich F, Alvarez-Sale R, Montserrat J, Quintana M, Figueira JC,  
490 Santos Olmo RMT, Garcia-Rodriguez J, Martin-Vega A, Ramirez E, Buno A, Martinez-Ales  
491 G, Garcia-Arenzana, Lopez CN, de Garcia MM, Moreno F, Reinisco-Barbero F, Martin-

492 Quiros A, River A, Mingorance J, Carpio CC, Arribas DP, Cuevas ER, Prados MC, Rios JJ,  
493 Herman J, Arribas JR, COVID@HULP working team. 2020. A cohort of patients with  
494 COVID-19 in a major teaching hospital in Europe.  
495 **doi:** <https://doi.org/10.1101/2020.04.29.20080853>

496 Buerhaus PI, Auerbach DI, Staiger DO. Older Clinicians and the Surge in Novel Coronavirus  
497 Disease 2019 (COVID-19). *JAMA*. Published online March 30, 2020.  
498 **doi:**[10.1001/jama.2020.4978](https://doi.org/10.1001/jama.2020.4978).

499 Cao B, Wang Y, Wen D, Liu W, Wang J, Fan G, Ruan L, Song B, Cai Y, Wei M, Li X, Xia J, Chen  
500 N, Xiang J, Yu T, Bai T, Xie X, Zhang L, Li C, Yuan Y, Chen H, Li H, Huang H, Tu S, Gong F,  
501 Liu Y, Wei Y, Dong C, Zhou F, Gu X, Xu J, Liu Z, Zhang Y, Li H, Shang L, Wang K, Li K, Zhou  
502 X, Dong X, Qu Z, Lu S, Hu X, Ruan S, Luo S, Wu J, Peng L, Cheng F, Pan L, Zou J, Jia C,  
503 Wang J, Liu X, Wang S, Wu X, Ge Q, He J, Zhan H, Qiu F, Guo L, Huang C, Jaki T, Hayden  
504 FG, Horby PW, Zhang D, Wang C. 2020. A Trial of Lopinavir-Ritonavir in Adults  
505 Hospitalized with Severe Covid-19. *The New England Journal of Medicine*.  
506 **doi:**[10.1056/NEJMoa2001282](https://doi.org/10.1056/NEJMoa2001282).

507 CDC COVID-19 Response Team 2020. Severe Outcomes among patients with Coronavirus  
508 2019 (COVID-19)- United States, Feb 12 to March 16, 2020. *MMWR Morb Mortal Wkly*  
509 *Rep* 69, 343-346.

510 Cecconi M, Pesenti A, of the COVID-19 Lombardy ICU Network 2020b. Baseline  
511 Characteristics and Outcomes of 1591 Patients Infected With SARS-CoV-2 Admitted to  
512 ICUs of the Lombardy Region, Italy *JAMA* **doi:**[10.1001/jama.2020.5394](https://doi.org/10.1001/jama.2020.5394).

513 Chan JF-W, Yuan S, Kok K-H, To K, Chu H, Yang J, Xing F, Liu J, Yip CC-Y, Poon R, Tsoi H-W, Lo  
514 SK-F, Chan K-H, Poon VK-M, Chan W-M, Ip JD, Cai J-P, Cheng CC-C, Hui CK-M, Yuen K-Y. A  
515 familial cluster of pneumonia associated with the 2019 novel coronavirus indicating  
516 person-to-person transmission: a study of a family cluster *Lancet* 395: 514-523.

- 517 Chen N, Zhou M, Dong X, Ou J, Gong Y, Han Y, Qiu Y, Wang J, Liu Y, Wei Y, Z J Yu T, Chang X,  
518 Zhang L. Epidemiological and clinical characteristics of 99 cases of 2019 novel  
519 coronavirus pneumonia in Wuhan, China: a descriptive study. *Lancet*. 2020;395:507–13.
- 520 Cereda D, Tirani M, Rovida F, Demicheli V, Ajelli M, Poletti P, Trentini F, Guzzetta G,  
521 Marziano V, Barone A, Magoni M, Deandrea S, Diurno G, Lombardo M, Faccini M, Pan A,  
522 Bruno R, Pariani E, Grasselli G, Piatti A, Gramegna M, Baldanti F, Melegaro A, Merler S.  
523 2020. The early phase of the COVID-19 outbreak in Lombardy, Italy PrePrint  
524 COVID-19 Surveillance Group (2020). Istituto Superiore di Sanità. Sorveglianza Integrata.  
525 Characteristics of SARS-CoV-2 patients dying in Italy. Report based on available data on  
526 April 13th, 2020. Accessed 15APR2020.  
527 [https://www.epicentro.iss.it/en/coronavirus/bollettino/Report-COVID-](https://www.epicentro.iss.it/en/coronavirus/bollettino/Report-COVID-2019_13_April_2020.pdf)  
528 [2019\\_13\\_April\\_2020.pdf](https://www.epicentro.iss.it/en/coronavirus/bollettino/Report-COVID-2019_13_April_2020.pdf)
- 529 Cummings MJ, Baldwin MR, Abrams D, Jacobson SD, Claassen J, Rabbani LE, Hastie J, Hochman BR,  
530 Salazar-Schicchi J, Yip NH, Brodie D, O'Donnell MR. Epidemiology, clinical course, and outcomes  
531 of critically ill adults with COVID-19 in New York City: a prospective cohort study  
532 **doi:** <https://doi.org/10.1101/2020.04.15.20067157> PrePrint
- 533 D'Adamo H, Yoshikawa T, Ouslander JG. Coronavirus Disease 2019 in Geriatrics and Long-  
534 term Care: The ABCDs of COVID-19 *J Am Geriatr Soc*. 2020 Mar 25. doi:  
535 [10.1111/jgs.16445](https://doi.org/10.1111/jgs.16445). [Epub ahead of print]
- 536 European Centre for Disease Prevention and Control 2020a. Coronavirus disease 2019  
537 (COVID-19) pandemic: increased transmission in the EU/EEA and the UK – eighth  
538 update, 8th April 2020. Stockholm. Accessed at:  
539 [https://www.ecdc.europa.eu/sites/default/files/documents/covid-19-rapid-risk-](https://www.ecdc.europa.eu/sites/default/files/documents/covid-19-rapid-risk-assessment-coronavirus-disease-2019-eighth-update-8-april-2020.pdf)  
540 [assessment-coronavirus-disease-2019-eighth-update-8-april-2020.pdf](https://www.ecdc.europa.eu/sites/default/files/documents/covid-19-rapid-risk-assessment-coronavirus-disease-2019-eighth-update-8-april-2020.pdf)
- 541 European Centre for Disease Prevention and Control 2020b. Coronavirus disease 2019  
542 (COVID-19) pandemic: increased transmission in the EU/EEA and the UK – ninth update,

543 23rd April 2020. Stockholm. Accessed at:  
544 <https://www.ecdc.europa.eu/sites/default/files/documents/covid-19-rapid-risk->  
545 [assessment-coronavirus-disease-2019-ninth-update-23-april-2020.pdf](https://www.ecdc.europa.eu/sites/default/files/documents/covid-19-rapid-risk-assessment-coronavirus-disease-2019-ninth-update-23-april-2020.pdf)  
546 Fan H, Zhang L, Huang B, Zhu M, Zhou Y, Zhang H, Tao X, Cheng S, Yu W, Zhu L, Chen J. 2020  
547 Retrospective Analysis of Clinical Features in 101 Death Cases with COVID-19, MedRxiv  
548 PrePrint <https://doi.org/10.1101/2020.03.09.20033068>  
549 Garg S, Kim L, Whitaker M, O'Halloran A, Cummings C, Holstein R, Prill M, Chai SJ, Kirley PD,  
550 Alden NB, Kawasaki B, Yousey-Hindes K, Niccolai L, Anderson EJ, Openo KP, Weigel A,  
551 Monroe ML, Ryan P, Henerson J, Kim S, Como-Sabetti K, Lynfield R, Sosin D, Rores S,  
552 Muse A, Bennett NM, Billing L, Sutton M, West N, Schaffner W, Talbot HK, Aquino C,  
553 George A, Budd A, Brammer L, Lagley G, Hall AJ, Fry A. 2020. Hospitalization Rates and  
554 Characteristics of Patients Hospitalized with Laboratory-Confirmed Coronavirus Disease  
555 2019 — COVID-NET, 14 States, March 1–30, 2020. Morbidity and Mortality Weekly  
556 Report 69.  
557 Guan WJ, Ni ZY, Hu Y, et al; China Medical Treatment Expert Group for Covid-19. Clinical  
558 characteristics of coronavirus disease 2019 in China. *N Engl J Med*.  
559 [doi:10.1056/NEJMoa2002032](https://doi.org/10.1056/NEJMoa2002032) – Original research  
560 Grasselli G, Presenti A, Cecconi M. 2020a Critical care Utilization for the COVID 19 outbreak  
561 in Lombardy Italy. JAMA Opinion. Accessed at: <https://jamanetwork.com/> by a NUS  
562 Libraries User on 03/16/2020  
563 Grasselli G, Zangrillo A, Zanella A, Antonelli M, Cabrini Luca, Castelli A, Cereda D, Coluccello  
564 A, Foti G, Fumagalli R, Iotti G, Latronico N, Lorini L, Merler S, Natalini G, Piatti A, Ranieri  
565 MV, Scandroglio AM, Storti E, Cecconi M, Pesenti A, COVID-19 ICU Network. 2020.  
566 Baseline Characteristics and Outcomes of 1591 Patients Infected With SARS-CoV-2  
567 Admitted to ICUs of the Lombardy Region, Italy JAMA. Published online April 6, 2020b.  
568 [doi:10.1001/jama.2020.5394](https://doi.org/10.1001/jama.2020.5394)

569 HPSC Epi Team. 2020. Daily Epidemiology Reports compiled by the PSC are available at:

570 <https://www.hpsc.ie/a->

571 [z/respiratory/coronavirus/novelcoronavirus/casesinireland/epidemiologyofcovid-](https://www.hpsc.ie/a-z/respiratory/coronavirus/novelcoronavirus/casesinireland/epidemiologyofcovid-)

572 [19inireland/](https://www.hpsc.ie/a-z/respiratory/coronavirus/novelcoronavirus/casesinireland/epidemiologyofcovid-19inireland/)

573 HPSC. 2020a. Epidemiology of COVID-19 in Ireland. 1<sup>st</sup> April 2020. Accessed at:

574 <https://www.hpsc.ie/a->

575 [z/respiratory/coronavirus/novelcoronavirus/casesinireland/COVID-](https://www.hpsc.ie/a-z/respiratory/coronavirus/novelcoronavirus/casesinireland/COVID-)

576 [19%20Epidemiology%20report%20for%20NPHET%2001.04.2020%20\\_website.pdf](https://www.hpsc.ie/a-z/respiratory/coronavirus/novelcoronavirus/casesinireland/COVID-19%20Epidemiology%20report%20for%20NPHET%2001.04.2020%20_website.pdf) on

577 05APR2020.

578 HPSC. 2020b. Epidemiology of COVID-19 in Ireland. 15<sup>th</sup> April 2020. Accessed at:

579 <https://www.hpsc.ie/a->

580 [z/respiratory/coronavirus/novelcoronavirus/casesinireland/COVID-](https://www.hpsc.ie/a-z/respiratory/coronavirus/novelcoronavirus/casesinireland/COVID-)

581 [19%20Epidemiology%20report%20for%20NPHET%2015.04.2020%20\\_website.pdf](https://www.hpsc.ie/a-z/respiratory/coronavirus/novelcoronavirus/casesinireland/COVID-19%20Epidemiology%20report%20for%20NPHET%2015.04.2020%20_website.pdf) on

582 17APR2020.

583 HPSC. 2020c. Epidemiology of COVID-19 in Ireland. 29<sup>th</sup> April 2020. Accessed at:

584 <https://www.hpsc.ie/a->

585 [z/respiratory/coronavirus/novelcoronavirus/casesinireland/COVID-](https://www.hpsc.ie/a-z/respiratory/coronavirus/novelcoronavirus/casesinireland/COVID-)

586 [19%20Epidemiology%20report%20for%20NPHET%2029.04.2020%20\\_website.pdf](https://www.hpsc.ie/a-z/respiratory/coronavirus/novelcoronavirus/casesinireland/COVID-19%20Epidemiology%20report%20for%20NPHET%2029.04.2020%20_website.pdf) on

587 01MAY2020.

588 HPSC. 2020d. Epidemiology of COVID-19 in Ireland. 6<sup>th</sup> May 2020. Accessed at:

589 <https://www.hpsc.ie/a->

590 [z/respiratory/coronavirus/novelcoronavirus/casesinireland/COVID-](https://www.hpsc.ie/a-z/respiratory/coronavirus/novelcoronavirus/casesinireland/COVID-)

591 [19%20Epidemiology%20report%20for%20NPHET%2006.05.2020%20v1%20website.pdf](https://www.hpsc.ie/a-z/respiratory/coronavirus/novelcoronavirus/casesinireland/COVID-19%20Epidemiology%20report%20for%20NPHET%2006.05.2020%20v1%20website.pdf)

592 on 08MAY2020.

593 Huang C, Wang Y, Li X, Ren L, Zhao J, Hu Y, Zhang L, Fan G, Xu J, Gu X, Cheng Z, Yu T, Xia Y,

594 Wu W, Xie X, Yin X, Li W, X Y, Gao H, Guo H, Xie J, Wang G, Jiang R, Gao Z, Wang J, Cao B.

595 2020. Clinical features of patients infected with 2019 novel coronavirus in Wuhan,  
596 China. Lancet. 395: 497–506.

597 Hu Z, Song C, Xu C, Jin G, Chen Y, Xu X, Ma H, Chen W, Lin Y, Zheng Y, Wang J, Hu Z, Yi Y,  
598 Hongbing S. 2020. Clinical characteristics of 24 asymptomatic infections with COVID- 19  
599 screened among close contacts in Nanjing, China, Sci China Life Sci 63.

600 Intensive Care National Audit & Research Centre (ICNARC), 2020a. Report on COVID-19 in  
601 critical care 08 May 2020. Assessed at:  
602 [https://www.icnarc.org/DataServices/Attachments/Download/b8c18e7d-e791-ea11-](https://www.icnarc.org/DataServices/Attachments/Download/b8c18e7d-e791-ea11-9125-00505601089b)  
603 [9125-00505601089b](https://www.icnarc.org/DataServices/Attachments/Download/b8c18e7d-e791-ea11-9125-00505601089b) on 08MAY2020

604 Intensive Care National Audit & Research Centre (ICNARC), 2020b. Report on COVID-19 in  
605 critical care 01 May 2020. Assessed at:  
606 [https://www.icnarc.org/DataServices/Attachments/Download/f48efee2-d38b-ea11-](https://www.icnarc.org/DataServices/Attachments/Download/f48efee2-d38b-ea11-9125-00505601089b)  
607 [9125-00505601089b](https://www.icnarc.org/DataServices/Attachments/Download/f48efee2-d38b-ea11-9125-00505601089b) on 02MAY2020

608 Istituto Superiore di Sanità. Sorveglianza Integrata COVID-19 in Italia: AGGIORNAMENTO 22  
609 marzo 2020 2020. Accessed at:  
610 [https://www.epicentro.iss.it/en/coronavirus/bollettino/Infografica\\_13aprile%20ENG.pd](https://www.epicentro.iss.it/en/coronavirus/bollettino/Infografica_13aprile%20ENG.pdf)  
611 [f](https://www.epicentro.iss.it/en/coronavirus/bollettino/Infografica_13aprile%20ENG.pdf) on 14APR2020

612 Istituto Superiore di Sanità. Sorveglianza Integrata Characteristics of SARS-CoV-2 patients  
613 dying in Italy Report based on available data on April 16th, 2020. Accessed 15APR2020.

614 Istituto Superiore di Sanità. Sorveglianza Integrata Characteristics of SARS-CoV-2 patients  
615 dying in Italy Report based on available data on April 29th, 2020. Accessed  
616 15APR2020[https://www.epicentro.iss.it/en/coronavirus/bollettino/Report-COVID-](https://www.epicentro.iss.it/en/coronavirus/bollettino/Report-COVID-2019_29_april_2020.pdf)  
617 [2019\\_29\\_april\\_2020.pdf](https://www.epicentro.iss.it/en/coronavirus/bollettino/Report-COVID-2019_29_april_2020.pdf)

618 Ki et al., 2020 Epidemiologic characteristics of early cases with 2019 novel coronavirus  
619 (2019-nCoV) disease in Korea Epi & Health 42, Article ID: e2020007, 18 pages  
620 <https://doi.org/10.4178/epih.e2020007>



- 621 Korean Society of Infectious Diseases, et al., 2020 Report on the Epidemiological Features of  
622 Coronavirus Disease 2019 (COVID-19) Outbreak in the Republic of Korea from January  
623 19 to March 2, 2020 J Korean Med Sci. 2020 Mar 16;35(10):e112. doi:  
624 10.3346/jkms.2020.35.e112
- 625 Kujawski SA, Wong KK, Collins JP, Epstein L, Killerby ME, Midgley CM, et al. First 12 patients  
626 with coronavirus disease 2019 (COVID-19) in the United States. medRxiv.  
627 2020:2020.03.09.20032896
- 628 Lewnard, JA, Liu VX, Jackson ML, Schmidt MA, Jewell BL, Flores JP, Jentz C, Northrup GR,  
629 Mahmud A, Reingold AL, Petersen M, Jewell NP, Young S, Bellows J. 2020. Incidence,  
630 clinical outcomes, and transmission dynamics of hospitalized 2019 coronavirus disease  
631 among 9,596,321 individuals residing in California and Washington, United States: a  
632 prospective cohort study DOI: : <https://doi.org/10.1101/2020.04.12.20062943>
- 633 Linton et al., Incubation Period and Other Epidemiological Characteristics of 2019 Novel  
634 Coronavirus Infections with Right Truncation: A Statistical Analysis of Publicly Available  
635 Case Data. Journ Clin Med. <https://doi.org/10.3390/jcm9020538>
- 636 Liu X, Zhou H, Zhou Y, Wu X, Zhao Y, Lu Y, Tan W, Yuan M, Ding X, Zou J, Li R, Liu H, Ewing  
637 RM, Hu Y, Nie H, Wang Y. 2020. Risk Factors Associated with Disease Severity and  
638 Length of Hospital Stay in COVID-19 Patients. J Infect  
639 <https://di.org/10.1016/j.jinf.2020.04.008>
- 640 Lo et al., 2020 Evaluation of SARS-CoV-2 RNA shedding in clinical specimens and clinical  
641 characteristics of 10 patients with COVID-19 in Macau. Int J Bio Sci 16, 1698 – 1707
- 642 McMichael T, Currie DW, Clark S, Pogojans S, Kay M, Schwatz NG, Lewis J, Baer A Lukoff  
643 MD, Ferro J, Brostrom-Smith C Rea TD, Sayre MR, Riedo FX, Russell D, Hiatt B,  
644 Montgomery P, Rao AK Chow EJ, Tobolowsky F, Hughes MJ, Bardossy AC, Oakley LP,  
645 Jacobs JR, Stone ND, Reddy SC, Jerigan JA, Honein MA, Clark TA, Duchin JS. and the CDC

- 646 Investigation Team. 2020. Epidemiology of Covid-19 in a Long-Term Care Facility in King  
647 County, Washington. *New Engl J Med* DOI: 10.1056/NEJMoa2005412
- 648 Myers LC, Parodi SM, Escobar GJ Liu V. 2020 Characteristics of Hospitalized Adults With  
649 COVID-19 in an Integrated Health Care System in California *JAMA Res Lett*  
650 doi:10.1001/jama.2020.7202
- 651 Onder G, Rezza G, Brusaferro A, Case-Fatality Rate and Characteristics of Patients Dying in  
652 Relation to COVID-19 in Italy. *JAMA*. doi:10.1001/jama.2020.4683. Opinion.
- 653 Paranjpe I, RussakAJ, De Freitas JK, Lala A, Miotto R, Vaid A, Johnson KW, Danieletto M,  
654 Golden E, Meyer D, Singh M, Somani M, Manna M, Nangia U, Kapoor A, O'Hagan R,  
655 O'Reilly PF, Huckins LM, Glowe P, Kia A, Timsina P, Freeman RM, Levin MA, Jhang J,  
656 Firpo A, Kovatch P, Finkelstein J, Aberg JA, Bagiella E, Horowitz CR, Murphy B, Fayad ZA,  
657 Narula J, Nestler EJ, Fuster V, CordonCardo C, Charney DS, Reich DL, Just AC, Bottinger  
658 EP, Charney AW, Glicksberg BS, Nadkarni GN, and on behalf of Mount Sinai Covid  
659 Infomatics Centre. Clinical characteristics of hospitalized Covid-19 patients in New York  
660 City. *MedRxiv Preprint*. doi: <https://doi.org/10.1101/2020.04.19.20062117>
- 661 Qian Z, Alaa AM, van der Schaar M, Ercole A 2020 Between-centre differences for COVID-19  
662 ICU mortality from early data in England. *MedRxiv* doi:  
663 <https://doi.org/10.1101/2020.04.19.20070722>.
- 664 Qiu H, Wu J, Hong L, Luo Y, Song Q, Chen D. 200 Clinical and epidemiological features of 36  
665 children with coronavirus disease 2019 (COVID-19) in Zhejiang, China: an observational  
666 cohort study *Lancet Inf Dis* DOI: 10.1016/S1473-3099(20)30198-5.
- 667 Remuzzi and Remuzzi Covid\_19 and Italy: What's next? *The Lancet*  
668 DOI:[https://doi.org/10.1016/S0140-6736\(20\)30627-9](https://doi.org/10.1016/S0140-6736(20)30627-9).
- 669 Rhodes A, Ferdinande P, Flaatten H, Guidet B, Metnitz PG, Moreno RP. The variability of  
670 critical care bed numbers in Europe. *Intensive Care Med*. 2012;38(10):1647-53.

- 671 <https://doi.org/10.1007/s00134-012-2627-8> PMID: 22777516.
- 672 Richardson S, Hirsch JS, Narasimhan M, Crawford JM, McGinn T, Davidson KW, and the  
673 Northern COVID-19 Research Group. 2020. Presenting Characteristics, Comorbidities,  
674 and Outcomes Among 5700 Patients Hospitalized With COVID-19 in the New York City  
675 Area. *JAMA*. Published online April 22, 2020. doi:10.1001/jama.2020.6775.
- 676 Russell, T.W., Hellewell, J., Jarvis, C.I., van Zandvoort, K., Abbott, S., Ratnayake, R., Flasche,  
677 S., Eggo, R.M., Edmunds, W.J., Kucharski, A.J. and CMMID COVID-19 working group,  
678 2020. Estimating the infection and case fatality ratio for coronavirus disease (COVID-19)  
679 using age-adjusted data from the outbreak on the Diamond Princess cruise ship,  
680 February 2020. *Eurosurveillance*, 25(12).
- 681 Spiteri Gianfranco, Fielding James, Diercke Michaela, Campese Christine, Enouf  
682 Vincent, Gaymard Alexandre, Bella Antonino, Sognamiglio Paola, Sierra Moros  
683 Maria José, Riutort Antonio Nicolau, Demina Yulia V., Mahieu Romain, Broas  
684 Markku, Bengnér Malin, Buda Silke, Schilling Julia, Filleul Laurent, Lepoutre  
685 Agnès, Saura Christine, Mailles Alexandra, Levy-Bruhl Daniel, Coignard Bruno, Bernard-  
686 Stoecklin Sibylle, Behillil Sylvie, van der Werf Sylvie, Valette Martine, Lina  
687 Bruno, Riccardo Flavia, Nicastri Emanuele, Casas Inmaculada, Larrauri Amparo, Salom  
688 Castell Magdalena, Pozo Francisco, Maksyutov Rinat A., Martin Charlotte, Van Ranst  
689 Marc, Bossuyt Nathalie, Siira Lotta, Sane Jussi, Tegmark-Wisell Karin, Palméus  
690 Maria, Broberg Eeva K., Beauté Julien, Jorgensen Pernille, Bundle Nick, Pereyaslov  
691 Dmitriy, Adlhoch Cornelia, Pukkila Jukka, Pebody Richard, Olsen Sonja, Ciancio Bruno  
692 Christian. First cases of coronavirus disease 2019 (COVID-19) in the WHO European  
693 Region, 24 January to 21 February 2020. *Euro Surveill*. 2020; 25 (9): pii=2000178.  
694 <https://doi.org/10.2807/1560-7917.ES.2020.25.9.2000178>
- 695 Stier A, Marc G, Berman LM, Bettencourt A. 2020 COVID-19 attack rate increases with city  
696 size. MedRxiv preprint. <https://doi.org/10.1101/2020.03.22.20041004>

- 697 Stoecklin et al., 2020 First cases of coronavirus disease 2019 (COVID-19) in France:  
698 surveillance, investigations and control measures, January 2020. Euro  
699 Surv 2020;25(6):pii=2000094
- 700 Tao Y, Cheng P, Chen W, Wan P, Chen Y, Yuan G, Chen J, Huo D, Guan G, Sun D, Tan J, Yang  
701 G, Zeng W, Zhu C. 2020 High incidence of asymptomatic SARS-CoV-2 infection,  
702 Chongqing, China BMJ Yale Available on MedRxiv  
703 <https://doi.org/10.1101/2020.03.16.20037259>.
- 704 Tian S, Hu N, Lou J, Chen K, Kang X, Xiang Z, Chen H, Wang D, Liu N, Liu D, Chen G, Zhang Y, Li  
705 D, Li J, Lian H, Niu S, Zhang L, Zhang J. 2020 Characteristics of COVID-19 infection in  
706 Beijing J Inf 80, 401-406 <https://doi.org/10.1016/j.jinf.2020.02.018>
- 707 Tricco AC, Erin Lillie E, Zarin W, O'Brien KK, Colquhoun H, Levac D, Moher D, Peters MDJ,  
708 Horsley T, Weeks L, Hempel S, Akl EA, Chang C, McGowan J, Stewart L, Hartling L,  
709 Aldcroft A, Wilson MG, Garritty G, Lewin S, Godfrey CM, Macdonald MT, Langlois EV,  
710 Soares-Weiser K, Moriarty J, Clifford T, Tunçalp Ö, Straus SE, 2020. PRISMA extension  
711 for scoping reviews (PRISMA-ScR): checklist and explanation. Ann Intern Med 169: 467 –  
712 473.
- 713 Valente-Acosta B, Hoyo-Ulloa I, Espinosa-Aguilar L, Mendoza-Aguilar R, Garcia-Guerrero J,  
714 Ontañon-Zurita D, Gomez-Gomez B, Fueyo-Rodríguez O, Vera-Zertuche JM, Anzola-Arias  
715 RJ, Jiménez-Ceja JV, Horta-Carpinteyro D, OlveraGuzman C3,5, Aguirre-Sanchez J5,  
716 Franco-Granillo J, Jauregui-Camargo L, SadaDíaz E, Saavedra-Perez-Salas R, Palomar-  
717 Lever A, Moreno-Sánchez F 2020 COVID-19 severe pneumonia in Mexico City – First  
718 experience in a Mexican hospital MedRxiv Preprint.  
719 **doi:** <https://doi.org/10.1101/2020.04.26.20080796>
- 720 Verity et al.,2020 Estimates of the severity of coronavirus disease 2019: a model-based  
721 analysis Lancet Inf Dz 2020. Published Online March 30, 2020.  
722 [https://doi.org/10.1016/S1473-3099\(20\)30243-7](https://doi.org/10.1016/S1473-3099(20)30243-7)

- 723 Wang D, Hu B, Hu C, et al. Clinical characteristics of 138 hospitalized patients with 2019  
724 novel coronavirus infected pneumonia in Wuhan, China. *JAMA*. 2020.  
725 <https://doi.org/10.1001/jama.2020.1585>.
- 726 Wen et al., 2020 Epidemiological and clinical characteristics of COVID-19 in Shenzhen, the  
727 largest migrant city of China <https://doi.org/10.1101/2020.03.22.20035246>
- 728 World Health Organization (WHO). 2020. Report of the WHO-China Joint Mission on  
729 Coronavirus Disease 2019 (COVID-19) 2020 [cited 2020 1 March]. Available from:  
730 [https://www.who.int/docs/defaultsource/coronaviruse/who-china-joint-mission-on-](https://www.who.int/docs/defaultsource/coronaviruse/who-china-joint-mission-on-covid-19-final-report.pdf)  
731 [covid-19-final-report.pdf](https://www.who.int/docs/defaultsource/coronaviruse/who-china-joint-mission-on-covid-19-final-report.pdf).
- 732 World Health Organization (WHO). Rapid reviews to strengthen health policy and systems: A  
733 practical guide. 2017. Eds Andrea C. Tricco, Etienne V Langlois and Sharon E Straus.  
734 Published by the World Health Organization (WHO).
- 735 Wu JT, Leung K, Bushman, M, Kishore N, Niehus R, de Salazar PM, Cowling BJ, Lipsitch M,  
736 Leung GM. 2020. Estimating clinical severity of COVID-19 from the transmission  
737 dynamics in Wuhan, China. *Nature Medicine* 26; 506 – 510.
- 738 Wu Z, McGoogan JM. Characteristics of and Important Lessons From the Coronavirus  
739 Disease 2019 (COVID-19) Outbreak in China: Summary of a Report of 72 314 Cases From  
740 the Chinese Center for Disease Control and Prevention. *JAMA*. Published online  
741 February 24, 2020. doi:10.1001/jama.2020.2648 5.
- 742 Xu XW, Wu XX, Jiang XG, et al. Clinical findings in a group of patients infected with the 2019  
743 novel coronavirus (SARS-Cov-2) outside of Wuhan, China: retrospective case series.  
744 *BMJ*. 2020;368: m606.
- 745 Yang X, Yu Y, Xu J et al (2020) Clinical course and outcomes of critically ill patients with SARS-  
746 CoV-2 pneumonia in Wuhan, China: a single-centered, retrospective, observational  
747 study. *Lancet Respir Med*. [https://doi.org/10.1016/S2213-2600\(20\)30079-5](https://doi.org/10.1016/S2213-2600(20)30079-5)

- 748 Yuan et al, The correlation between viral clearance and biochemical outcomes of 94  
749 COVID-19 infected discharged patients. *Inflammation Research*.  
750 <https://doi.org/10.1007/s00011-020-01342-0>.
- 751 Young, EB et al., 2020. Epidemiologic Features and Clinical Course of Patients Infected With  
752 SARS-CoV-2 in Singapore. Original Investigation *JAMA*. Original Investigation  
753 March 3, 2020Published online March 3, 2020. doi:10.1001/jama.2020.3204.
- 754 Zhang C, Gu J, Chen Q, Deng N, Li J, Huang L, Zhou X. 2020a Clinical Characteristics of 34  
755 Children with Coronavirus Disease-2019 in the West of China: a Multiple-center Case  
756 Series <https://doi.org/10.1101/2020.03.12.20034686> doi: medRxiv preprint.
- 757 Zhang G, Hu C, Luo L, Fang F, Chen Y, Li J, Peng Z, Pan H. 2020b. Clinical features and  
758 outcomes of 221 patients with COVID-19 in Wuhan, China MedRxiv Preprint.  
759 Doi: <https://doi.org/10.1101/2020.03.02.20030452>.
- 760 Zhao J, Yang Y, Huang H, Li D, Gui D, Lu X, Zhang Z, Liu L, Liu T, Liu Y, He Y, Sun B, Wei M, ang  
761 G, Wang X, Zhang L, Zhou X, Xing M, Wang PG. 2020 Relationship between the ABO  
762 Blood Group and the COVID-19 Susceptibility. MedRxiv preprint.  
763 doi: <https://doi.org/10.1101/2020.03.11.20031096>.
- 764 Zhou F, Yu T, Du R, Fan G, Liu Y, Liu Z, et al. Clinical course and risk factors for mortality of  
765 adult inpatients with COVID-19 in Wuhan, China: a retrospective cohort study. *The*  
766 *Lancet*. 2020.
- 767

768 **Figure legends**

769

770 Figure 1. The crude mortality rate (CMR) expressed as the percentage of notified deaths to  
771 cases over time, from number of days lapsed since the notification of the tenth case for  
772 12 selected European countries. Data tabulating the notified cases and deaths from all  
773 countries is available from the European Centre for Disease Control and Prevention;  
774 [https://www.ecdc.europa.eu/en/publications-data/download-todays-data-geographic-](https://www.ecdc.europa.eu/en/publications-data/download-todays-data-geographic-distribution-covid-19-cases-worldwide)  
775 [distribution-covid-19-cases-worldwide](https://www.ecdc.europa.eu/en/publications-data/download-todays-data-geographic-distribution-covid-19-cases-worldwide)

776

777 Figure 2. The cumulative number of notified cases (grey bars) in Ireland between 30th March  
778 and 23<sup>rd</sup> April; the percentage of COVID positive cases that were hospitalised (black  
779 line); and those that were admitted to ICU (maroon line) for the same period. Data  
780 extracted from publicly available data published by the Health Protection Surveillance  
781 Centre (HPSC), Ireland.

782

783 Figure 3. The median (maroon square) and 25<sup>th</sup> (blue diamond) and 75<sup>th</sup> percentile (green  
784 diamond) for eight relevant articles and reports describing the median (and IQR)  
785 length of stay in hospital due to COVID-19 infection. Two studies (Linton et al., 2020;  
786 Yuan et al., 2020) reported means (maroon circle) and confidence intervals  
787 (diamonds); while one study (Liu et al., 2020) reported median (square) and range (X)  
788 for length of stay following COVID-19 infection. The Italian report (COVID-19 Group,  
789 2020) indicates a median of 5 days; no estimate of variance was reported. A subgroup  
790 of the Valente-Acosta (2020) article is greyed, as only 4 remained in the group.

791

792 Figure 4. The median (blue diamond) and 25<sup>th</sup> (maroon square) and 75<sup>th</sup> percentile (green  
793 diamond) for eight relevant articles and reports describing the median (and IQR)

794 length of stay in an ICU due to COVID-19 infection. The Italian report (COVID-19  
795 Group, 2020) indicates a median of 8 days (including ICU stay for deceased patients);  
796 no estimate of variance was reported. The UK report separates survivors from those  
797 who have died in care, the authors also indicate bias towards shorter lengths of stay  
798 as this cohort has completed their ICU stay.  
799  
800



801 Figure 1.

802

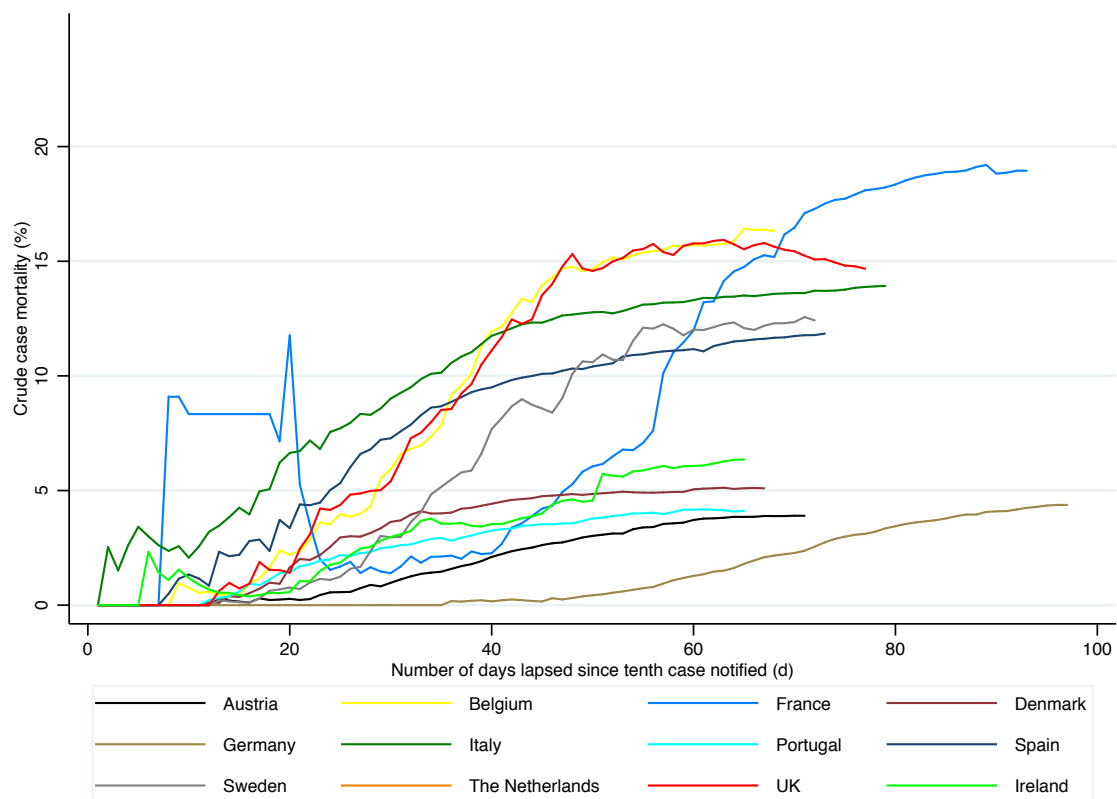

803

804

805

806

807

808

809

810

811

812

813

814 Figure 2.

815

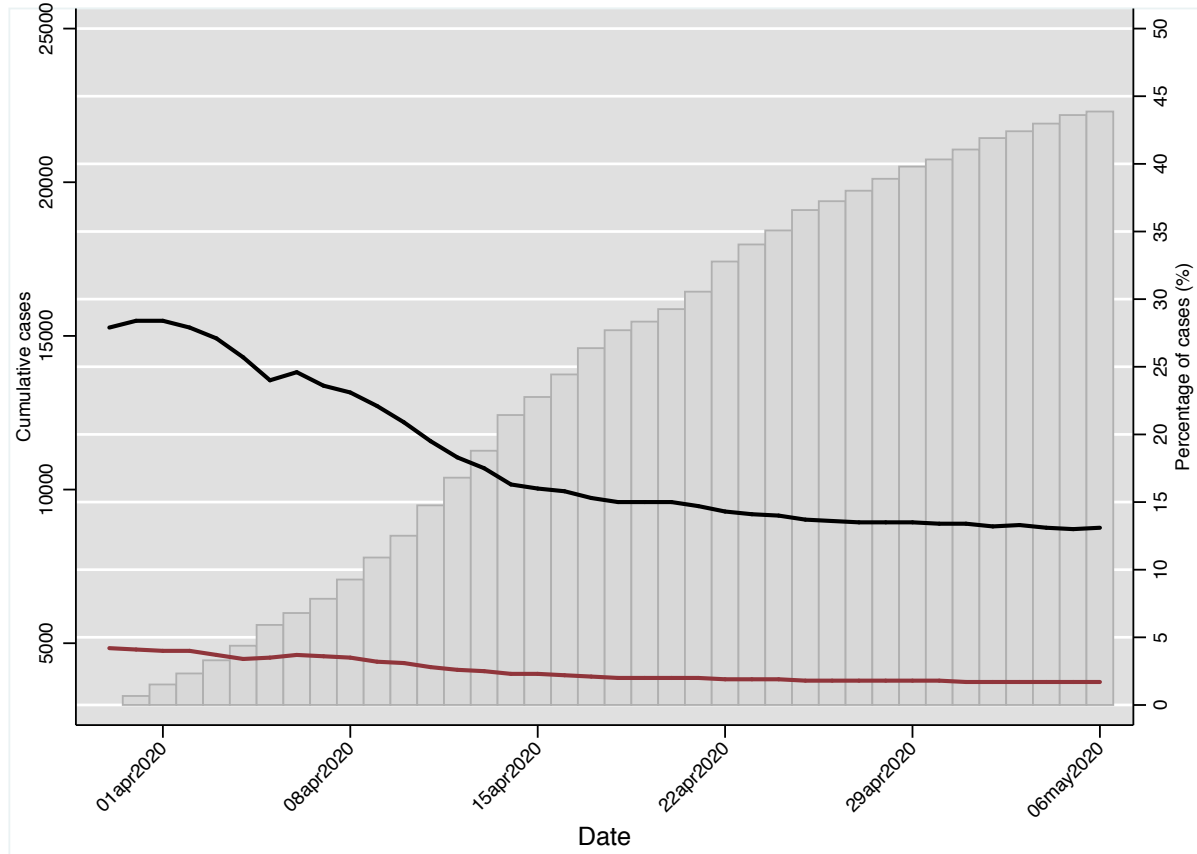

816

817 Figure 3

818

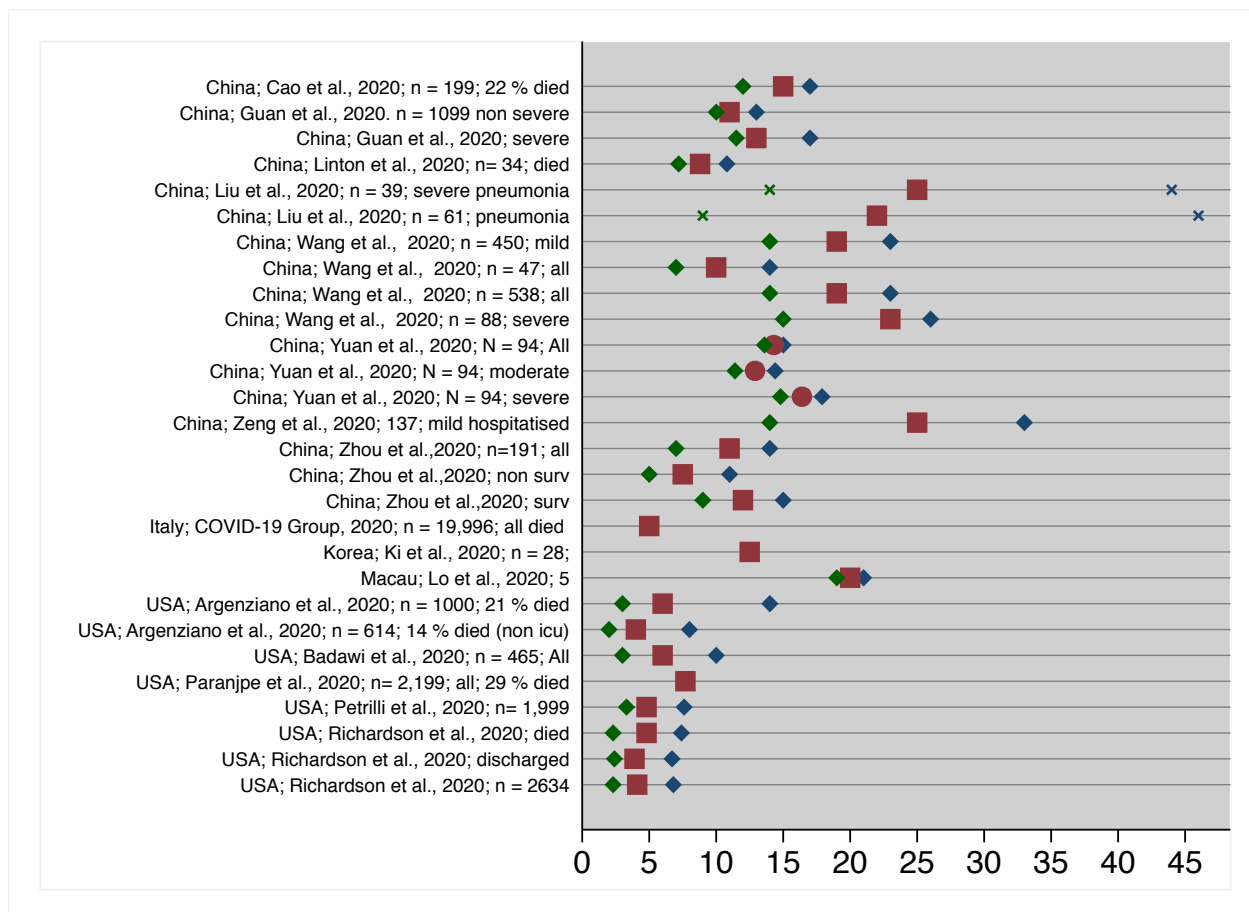

819

820

821

822

823

824

825

826

827

828

829 Figure 4.

830

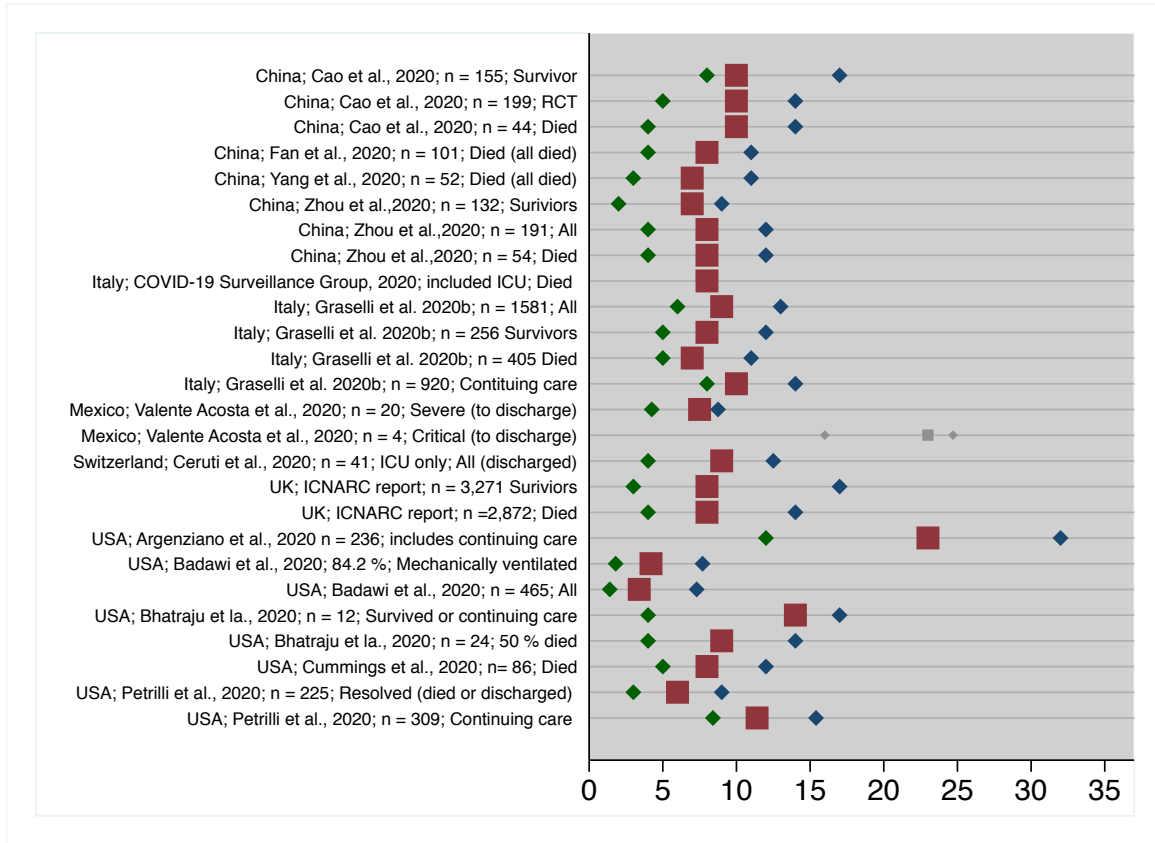

831

832

833

834

835

Table 1. A summary of published articles and reports relating to hospitalisation following COVID-19 infection, by country.

| Paper                      | Location                | Timing                 | Demographics                                                                                                                                                                   | Proportion higher level care                                                                                                                                                                                                                                                       | Time from (days, IQR)                                                                                                                                                                                               | Outcomes                                                                                     | Comments                                                                                                                        |
|----------------------------|-------------------------|------------------------|--------------------------------------------------------------------------------------------------------------------------------------------------------------------------------|------------------------------------------------------------------------------------------------------------------------------------------------------------------------------------------------------------------------------------------------------------------------------------|---------------------------------------------------------------------------------------------------------------------------------------------------------------------------------------------------------------------|----------------------------------------------------------------------------------------------|---------------------------------------------------------------------------------------------------------------------------------|
| <b>China</b>               |                         |                        |                                                                                                                                                                                |                                                                                                                                                                                                                                                                                    |                                                                                                                                                                                                                     |                                                                                              |                                                                                                                                 |
| Huang et al., 2020 PR      | Wuhan, China            | 16DEC2019 to 02JAN2020 | 41 patients median Age 49 (IQR 41-58) Underlying dx 13 (32 %) Contact to Hunan mkt 27 (66 %)                                                                                   | 13 of 41 to ICU<br>4 of 41 mech vent<br>2 of 41 ECMO                                                                                                                                                                                                                               | Time from symptoms:<br>To Hospital 7, 4 – 8<br>To dysnoea 8, 5 - 13<br>To ARDS 9, 8 – 14<br>Mech vent 10.5, 7 - 14<br>ICU 10.5, 8 - 17                                                                              | 6 (15%) patients died<br>28 (68 %) discharged                                                |                                                                                                                                 |
| Chen et al., 2020          | Wuhan, China            | 01JAN2020 to 20JAN2020 | 99 lab confirmed patients, 49 (49 %) exposure to Hunan market. Mean age 55.5 (SD 13.1), 67 male, 32 female. 50 (51 %) chronic conditions.                                      | 31 (31 %) dyspnoea<br>17 (17 %) ARDS<br>75 (76 %) Oxygen thx<br>Mechanical ventilation<br>Non invasive 13 (13%); median 9, IQR 7 to 19, range 4 to 22 days<br>Invasive 4 (4 %) 17, IQR 12 - 19, range 3 to 20 days<br>CRRT 9 (9 %)<br>ECMO 3 (3 %)                                 |                                                                                                                                                                                                                     | 11 (11%) died<br>31 (31 %) discharged<br>57 (58 %) still hospitalized by study cut off       |                                                                                                                                 |
| Guan et al., 2020 PR       | China – 30 provinces    | To 31JAN2020           | 1099 patients. Median age 47 (range 35-58) 41.9 % female                                                                                                                       | 453 (41.3 %) oxygen<br>67 (6.1 %) mech vent<br>55 (5 %) to ICU                                                                                                                                                                                                                     |                                                                                                                                                                                                                     | 15 (1.4 %) died<br>93 % continued hospitalisation                                            |                                                                                                                                 |
| Zhou et al., 2020 PR       | Wuhan, China            | To 31JAN2020           | 191 patients. Median age 56 (IQR 46 – 67, Range 18-87<br>Non surv (median 69 yrs)<br>Surv (median 52 yrs)<br>Pre-existing 48 %                                                 |                                                                                                                                                                                                                                                                                    | Time to development:<br>dysnoea 7, 4 to 9,<br>to ARDS 12, 8 to 15<br>to ICU 12, 8 to 15                                                                                                                             | 54 (28 %) of 191 died<br>137 (72 %) discharged                                               | Median duration of shedding 20 days (longest 37 days)                                                                           |
| Linton et al., 2020 PR     | China                   | To 31JAN2020           | Onset hospital to admission:<br>Living n = 155<br>Dead n= 34<br>Hospital admission to death n= 29<br>Male 58 %, age range 30 – 59 (9 missing)                                  | NR                                                                                                                                                                                                                                                                                 | Onset to hospital admission 3.3, CI 2.9 – 5.3 (living)<br>6.5, CI 5.0 – 7.8 (dead)                                                                                                                                  |                                                                                              | Article that collated data from open source and news reports                                                                    |
| Wang et al., 2020 JAMA. PR | Wuhan, China            | 01JAN2020 to 03FEB2020 | 138 patients, median age 56, IQR 42 - 68, range 22-92 yrs. 75 (54.3 % male. ICU patients n = 36 older median age 66 vs 51, underlying conditions 26 (72 %) vs 38 (37.3%).      | ICU 36 of 138 (26.6 %) ARDS 22 of 36 (61.1 %) High flow O2: 4 (11 %) Non invasive ventilation 15 (41.7 %) 17 (47.2 %) invasive ventilation 4 of 36 ECMO                                                                                                                            | Time to dyspnoea 5 days<br>To admission 7 days, ARDS 8 days                                                                                                                                                         | 6 patients (4.3 %) died<br>47 (34.1%) discharged<br>remainder hospitalised at study cut off. | Hospital assoc. transmission suspected 40 (29 %) HCW and 17 (12.3 %) hospitalized patients.                                     |
| Yang et al., 2020          | Wuhan, China            | DEC 2019 to 26JAN2020  | Some 52 (of 710 in cohort) critically ill adult patients confirmed cases admitted to ICU. Mean age 59.7 (SD 13.3) years, 35 (67 %) male, 21 (40 %) had pre-existing conditions | 35 (67 %) ARDS<br>37 (71 %) mechanical ventilation<br>Compared to survivors, non-survivors were older (64.6 years vs. 51.9 years) more likely to develop ARDS; 26 (81 %) vs. 9 (45 %) patients; and more likely to receive mechanical ventilation; 30 (94 %) vs. 7 (35 %) patients | Interval onset to ICU admission:<br>Surv: 9, 6 – 12.<br>Non-surv 11, 7 – 14.                                                                                                                                        | 32 % died by 28 days                                                                         | Hospital-acquired infection occurred in seven (13.5 %) patients. APACHE II and SOFA score lower in survivors vs. non survivors. |
| Fan et al., 2020 Pre-print | Wuhan China             | 30DEC2019 to 16FEB2020 | 101 patients, mean age 65.5 years (range 24 to 83). 64 males, 37 females. All died. Majority underlying, 25.7 % two conditions.                                                | All (101, 100 %) oxygen therapy, 84 (83.17 %) non-invasive ventilator or high flow oxygen, 79 (78.2%) invasive ventilation. 7 patients ECMO, 8 treated with CRRT                                                                                                                   | Onset to hospital 11, 8 to 13.5<br>To death 21, 17 to 27.5<br>To ARDS 12, 9 to 14<br>ARDS to invasive mechanical ventilation 3, 0 to 6.<br>Duration invasive mechanical ventilation 5, 2 to 8; range 1 to 31 days). | All died – criteria for inclusion was death                                                  | Early paper - 57 patients lab confirmed, 44 clinically consistent                                                               |
| Xu et al., 2020            | Zhejiang province China | 10JAN2020 to 26JAN2020 | 62 patients median age 41 yrs (IQR32 – 52 yrs). 35 (56 %) male. 20 of 62 (32 %) had underlying condition.                                                                      | ICU 1 of 62<br>ARDS 1 of 62<br>Mechanical ventilation 1 of 62                                                                                                                                                                                                                      | Two patients (3%) shortness of breath on admission.<br>Median time from exposure to onset of                                                                                                                        | 61 of 62 (98 %) hospitalised<br>0 of 62 (0 %) died                                           | Less severe presentations observed in Zhejiang Province compared with                                                           |

|                                                 |                 |                        |                                                                                                                                                                                                                                                                          |                                                                                                                                            |                                                                                                                           |                                                                                                                                                                      |                                                                                                                                                |
|-------------------------------------------------|-----------------|------------------------|--------------------------------------------------------------------------------------------------------------------------------------------------------------------------------------------------------------------------------------------------------------------------|--------------------------------------------------------------------------------------------------------------------------------------------|---------------------------------------------------------------------------------------------------------------------------|----------------------------------------------------------------------------------------------------------------------------------------------------------------------|------------------------------------------------------------------------------------------------------------------------------------------------|
|                                                 |                 |                        |                                                                                                                                                                                                                                                                          |                                                                                                                                            | was 4, 3-5), Onset to admission was 2, 1-4.                                                                               |                                                                                                                                                                      | Wuhan                                                                                                                                          |
| Wen et al., 2020 Pre-print                      | Shenzhen, China | 01JAN2020 to 28FEB2020 | 417 confirmed cases<br>37 (8.9 %) mild<br>344 (82.5 %) moderate.<br>36 (8.6 %) severe or critical. Mean age 45.4 years. 220 (52.8 %) female.                                                                                                                             |                                                                                                                                            | Time to:<br>Onset to medical visit 1, 0 – 3.<br>Medical visit to admission 0, 0 to 2.<br>admission to PCR result 1, 1 – 3 | 3 (0.7 %) died<br>299 (71.7%) discharged.<br>115 (27.6 %) hospitalized at study cutoff                                                                               | Notes longer time from first medial visit to admission greater severity. Surv cases more likely to severe illness – warning to treat earlier . |
| Wu and McGoogan 2020 Opinion                    | China           | To 11FEB2020           | 72,314 Cases (as of February 11, 2020)<br>Confirmed cases: 44,672 (62%)<br>Suspected cases: 16,186 (22%)<br>Diagnosed cases: 10,567 (15%)<br>Asymptomatic cases: 889 (1%)                                                                                                | Spectrum of disease (N = 44,415)<br>Mild: 81 % (36,160 cases)<br>Severe: 14 % (6,168 cases)<br>Critical: 5 % (2,087 cases)                 |                                                                                                                           | 1023 of 44,672 (2.3 %) died<br>208 of 1,408 (14.8%) aged 80+ years<br>312 of 3,918 (8.0 %) aged 70-79 years<br>1,023 of 2,087 (49.0 %) critical cases died           | HCW infected 1,716 of 44,672 (3.8 %) overall<br>1,080 of 1,716 (63 %) in Wuhan<br>247 of 1,668 (14.8%) classified severe or critical<br>5 died |
| <b>Singapore</b>                                |                 |                        |                                                                                                                                                                                                                                                                          |                                                                                                                                            |                                                                                                                           |                                                                                                                                                                      |                                                                                                                                                |
| Young et al., 2020 Case Series                  | Singapore       | To 25FEB2020           | 18 patients. Median age was 47 yrs, 50 % male, 50 % female                                                                                                                                                                                                               | 6 of 18 (33.3 %) Oxygen2 of 18 (11.1 %) to ICU<br>1 of 18 (5.6 %) mech vent                                                                |                                                                                                                           |                                                                                                                                                                      |                                                                                                                                                |
| <b>Korea</b>                                    |                 |                        |                                                                                                                                                                                                                                                                          |                                                                                                                                            |                                                                                                                           |                                                                                                                                                                      |                                                                                                                                                |
| Ki et al., 2020 Epi Health Special Article      | Korea           | 20JAN2020 to 10FEB2020 | 28 patients; 15 (53.6 % male. Med age 42 yrs, range 21-73.                                                                                                                                                                                                               |                                                                                                                                            | Onset to diagnosis 4, range 0 – 16.<br>Onset to quarantine / isolation 3, range 0 to 15 days.                             |                                                                                                                                                                      | 3 asymptomatic<br>4 discharged<br>other continue hospitalisation – none listed as serious at study cut off.                                    |
| <b>Macau</b>                                    |                 |                        |                                                                                                                                                                                                                                                                          |                                                                                                                                            |                                                                                                                           |                                                                                                                                                                      |                                                                                                                                                |
| Lo et al., 2020 Int J Biol Sci PR               | Macau           | 21JAN2020 to 16FEB2020 | 10 cases. Median age 54 years (IQR 27 to 64). Two patients were assigned a mild classification, four moderate and four severe. 5 of 10 pre-existing condition.                                                                                                           | 10 of 10 hospitalised, 0 of 10 to ICU.<br>0 of 10 ARDS                                                                                     |                                                                                                                           | 5 discharged and 5 remained hospitalized at study cutoff.                                                                                                            |                                                                                                                                                |
| <b>Italy</b>                                    |                 |                        |                                                                                                                                                                                                                                                                          |                                                                                                                                            |                                                                                                                           |                                                                                                                                                                      |                                                                                                                                                |
| Graselli et al. 2020 Opinion                    | Lombardy Italy  | 20FEB2020 to 07MAR2020 | 3,420 cases                                                                                                                                                                                                                                                              | 359 of 3420 (16 %) ICU                                                                                                                     |                                                                                                                           |                                                                                                                                                                      |                                                                                                                                                |
| Cereda et al., 2020 Pre-print                   | Lombardy Italy  | 20FEB2020 to 08MAR2020 | 5,830 cases.<br>204 asymptomatic<br>Median age 69 yrs (ranged 1 month to 101 yrs).<br>62% male                                                                                                                                                                           | 204 asymptomatic<br>5,626 reported symptoms<br>47 % hospitalized<br>18 % ICU                                                               |                                                                                                                           | 346 died<br>highest in older groups 14 % in 75 + yrs                                                                                                                 |                                                                                                                                                |
| Graselli et al. 2020b PR                        | Lombardy Italy  | 20FEB2020 to 18MAR2020 | 1,591 patients admitted to ICU                                                                                                                                                                                                                                           | 1287 of 1300 (99 %) required respiratory support;<br>1150 (88 %), mechanical ventilation<br>137 (11 %,) received non-invasive ventilation. |                                                                                                                           | ICU mortality 26 %.<br>Older patients (n = 786; age 64 years and older) had higher mortality (36 %) than younger patients (n = 795; age aged 63 years or less (15 %) | ICU patients only; inclusion criterion                                                                                                         |
| COVID-19 Surveillance Group, 2020 Health report | Italy           | Up to 29APR2020        | 25,452 deceased patients. Median age was 81 years (IQR 73 to 87).<br>Females 9,684 (38 %).<br>Overall, 3.8 % presented with a no pre-existing condition, 14.5 % with 1, 21.4 % with 2, and 60.3 % with 3 or more.<br>Number of patients transferred to ICU not reported. | ARDS occurred in 96.7 % of cases                                                                                                           | Median onset symptoms to death 10 days, onset to hospitalization was 5 days (IQR or ranges not presented)                 | All patients died (n = 25,452). ARDS in 97.1 % of cases, acute renal failure in 23.3 %.<br>Superinfection 12.6 % and acute cardiac injury in 10.9 % of cases.        | All patients died; inclusion criterion<br>It is not clear what number of patients were transferred to ICU care.                                |
| <b>Spain</b>                                    |                 |                        |                                                                                                                                                                                                                                                                          |                                                                                                                                            |                                                                                                                           |                                                                                                                                                                      |                                                                                                                                                |
| Borobia et                                      | Madrid,         | 25FEB2020              | 2,226 of 3,127 patients                                                                                                                                                                                                                                                  | 2,226 of 3,127 patients                                                                                                                    | Median onset symptoms                                                                                                     | 460 of 2,226 died                                                                                                                                                    | Most frequent                                                                                                                                  |

|                                   |                         |                        |                                                                                                                                                                                            |                                                                                                                                                                                                |                                                                                     |                                                                                                                                                                               |                                                                                                                        |
|-----------------------------------|-------------------------|------------------------|--------------------------------------------------------------------------------------------------------------------------------------------------------------------------------------------|------------------------------------------------------------------------------------------------------------------------------------------------------------------------------------------------|-------------------------------------------------------------------------------------|-------------------------------------------------------------------------------------------------------------------------------------------------------------------------------|------------------------------------------------------------------------------------------------------------------------|
| al., 2020                         | Spain                   | to 19APR2020           | were hospitalized. Median age 61, 46 – 78, 52 % female. 78 % at least one pre-existing condition. 41 % hypotensive, 19 % Chronic heart disease, 17 % DM.                                   | were hospitalized. 460 of 2,226 died (20.7 %); or 1,766 of 2,226 (79.3 %) discharged. 237 (10.6 %) admitted to ICU, 116 continued care ICU, 55 died, 20 discharged, 46 discharged to acute bed | to hospital admission 6, 3 – 9 d                                                    | (20.7 %); 1,766 of 2,226 (79.3 %) discharged                                                                                                                                  | complication acute confusional syndrome 197 (9 %), acute kidney failure 173 (8 %) and ARDS 109 (5 %).                  |
| <b>Switzerland</b>                |                         |                        |                                                                                                                                                                                            |                                                                                                                                                                                                |                                                                                     |                                                                                                                                                                               |                                                                                                                        |
| Ceruti et al., 2020               | Switzerland             | 14MAR2020 to 12APR2020 | 41 ICU patients. mean age 64 (- 16.5) years, 35 (85 %) male.                                                                                                                               | 41 of 310 (13.2 %) admitted to clinic admitted to ICU. 54 with DNR not considered for ICU admittance.                                                                                          |                                                                                     | 10 died (24 %); 2 transferred out; 24 (61 %) discharge                                                                                                                        | 41 patients admitted to ICU from 310 at clinic. 34 (83 %) required mechanical ventilaton. 25 (61 %) to discharge.      |
| <b>USA</b>                        |                         |                        |                                                                                                                                                                                            |                                                                                                                                                                                                |                                                                                     |                                                                                                                                                                               |                                                                                                                        |
| Kujawski et al., 2020 Case series | USA 6 States 6 of 12 CA | 20JAN2020 to 05FEB2020 | 12 patients. Median age 53 yrs (range 21 to 68). 8 male. 4 of 5 with underlying conditions hospitalised                                                                                    | Hospitalisation 7 of 12. 5 of 12 Dyspnoea 4 of 12 supplemental oxygen ICU 1 of 12 patient                                                                                                      | Onset to resolution 14 range 6 to 20                                                | 11 of 12 discharged or home isolation 1 hospitalized at study cut off ( in ICU)                                                                                               | Case series n = 12.                                                                                                    |
| CDC COVID-19 Response Team Report | USA                     | 12FEB2020 to 16MAR2020 | 4,226 cases. Hospitalization status missing 1,514 cases. ICU status missing or 2,253 cases. Illness outcome or death missing or unknown for 2,001 cases                                    | Hospitalisation in 20.7 to 31.4 % of cases, with ICU admission required for 4.9 to 11.5 %.                                                                                                     |                                                                                     | Case fatality estimates: >85 years, ranging from 10% to 27%, 65 – 84 yrs: 3% to 11% persons, 55 – 64 years: 1% to 3%                                                          | Estimate range presented to account for missing data                                                                   |
| Badawi et al., 2020               | USA New York City       | 23MAR2020 to 06APR2020 | Hourly results from 186 ICU beds from 14 ICUs and 9 hospitals. 465 patients.                                                                                                               | Mean age 63.7 (SD +/- 14.3). 312 (67 %) male.                                                                                                                                                  |                                                                                     | During pandemic - DRS highest reached 37.5 (1.5 – 71.5) versus (0.9 (0.2 to 7.1; pre pandemic. Last DRS before ICU discharge: 17.5 (0.8 – 71) vs 0.3 (0.1 – 1.2 pre-pandemic. |                                                                                                                        |
| Myers et al., 2020                | USA, California         | 01MAR2020 to 30MAR2020 | 377 of 1,299 est positive hospitalised. Median age 61, 50 – 73 years. 212 (56 %) male.                                                                                                     | Hospitalisation 29 % (377 of 1,299 test positives. 113 (8.7 %) to ICU                                                                                                                          |                                                                                     | Of 321 with resolved status; 50 (15.6 % died). 34 of 68 (50 %) ICU patients died.                                                                                             | Invasive ventilation in 110 of 377 (29 %) patients, 103 of 113 (91 %) ICU patients.                                    |
| Cummings et al., 2020             | US, New York            | 02MAR2020 to 01APR2020 | 257 of 1,150 hospitalised patients categorised critical. Median age 62, 51 – 72. 170 of 257 ((66 %) male. 82 % at least one pre-existing condition.                                        | Of those enrolled 257 of 1,150 (22 %) transferred to ICU,                                                                                                                                      | Onset to presentation 6 (SD +/- 5) d.                                               | 86 of 257 (33 %) died in hospital. 122 of 257 continuing care. 4 transferred. 45 of 257 discharged alive.                                                                     | 201 of 257 received invasive mechanical ventilation. 13, 9 – 17 d.                                                     |
| Paranjpe et al., 2020             | USA New York City       | 27FEB2020 to 02APR2020 | 2,199 COVID-19 positive hospitalised patients. Median age 65, 75 if died, 59 if discharged. Pre-existing conditions in 46 % of discharged, 64 % of died patients.                          | All hospitalised. 1,078 completed stay, 36 % admitted to ICU care during stay.                                                                                                                 |                                                                                     | Of 1,078 with resolved status; 768 (71 %) discharged, 310 (29 %) died.                                                                                                        | All hospitalised. 1,078 completed stay                                                                                 |
| Richardson et al., 2020           | USA, New York           | 01MAR2020 to 04APR2020 | 5700 patients. Median age 63, 52 – 75 yrs. 2263 (39.7 %) female. 350 (6.1 %) no pre-existing condition, 359 (6.3 %) had 1 pre-existing condition, 4,991 (88 %) > 1 pre-existing condition. | All admitted to 1 of 12 hospitals in New York. 373 of 2634 (14.2 %) of patients who completed stay transferred to IC. 320 (12.2 %) required mechanical ventilation.                            |                                                                                     |                                                                                                                                                                               | 553 of 2,634 (21 %) died. Mortality for mechanically ventilated patients 88.1 %. 45 (2.2 %) patients were re-admitted. |
| Argenziano et al., 2020           | USA, New York           | 01MAR2020 to 05APR2020 | 1000 patients. 150 ED only treatment, 614 admitted to general wards, 236 admitted to ICU. Median age 63, 50 75. 596 (60 %) male. Only 82 (8.2 %) no pre-existing                           | Of 2,423 tested, 1,403 positive, 1,132 received ED or hospital care. 1000 followed up. 23.6 % admitted to ICU care.                                                                            | Time to initial intubation (136 patients) was bimodal, 3 4 d, or 9 days post onset. | At cutoff 90 (9 %) continuing care 699 (70 %) discharged; 211 (21.1 %) died. 103 of 236 (43.6 %)                                                                              | Of the 150 ED only patients; 85 % discharged, 14.7 % died before admission. 233 (23.3 %)                               |

|                      |                                     |              |                                                                                          |                                                                                                                                             |  |                                                                                           |                                                                                                                                                           |
|----------------------|-------------------------------------|--------------|------------------------------------------------------------------------------------------|---------------------------------------------------------------------------------------------------------------------------------------------|--|-------------------------------------------------------------------------------------------|-----------------------------------------------------------------------------------------------------------------------------------------------------------|
|                      |                                     |              | conditions. 75 % BMI > 25.                                                               |                                                                                                                                             |  | ICU cases died.                                                                           | intubated at least once. Duration of mechanical ventilation 6, 2 – 13 days if died; 9, 6.5 – 12 d if discharged.; and 28, 22.5 – 32 d if continuing care. |
| Lewnard et al., 2020 | USA California and Washington state | To 09APR2020 | 1,277 patients. Median age 60, 47 – 72. 56.8 % male. 817 of 1,299 (64 %) completed stay. | 158 of 617 (25.6 %) admitted to ICU (data not available from Washington State)<br><br>Estimates of admissions to ICU 41.9 % (34.1 – 51.4 %) |  | Mortality 119 of 772 (15.4 %).<br><br>Estimates for ICU fatalities 17.8 % (14.3 – 22.2 %) | Adjusted for censored data and status of new hospitalizations - hence estimates calculated.                                                               |
| <b>Ireland</b>       |                                     |              |                                                                                          |                                                                                                                                             |  |                                                                                           |                                                                                                                                                           |
| HPSC Ep Team 2020a   | Ireland                             | To 30MAR2020 | 2,990 confirmed cases. Median age 48, range 0 to 99 years.                               | Hospitalisation in 834 of 2,990 (27.9 %) of cases. ICU in 126 of 2,990 cases (4.2 %)                                                        |  |                                                                                           | 84 (2.8 % died)                                                                                                                                           |
| HPSC Ep Team 2020b   | Ireland                             | To 13APR2020 | 11,261 confirmed cases. Median age 48, range 0 to 106 years.                             | Hospitalisation in 1,968 of 11,261 (17.5 %) of cases. ICU in 280 of 11,261 cases (2.5 %)                                                    |  |                                                                                           | 435 (3.9 %) died<br><i>Data includes HPSC Ep Team 2020b</i>                                                                                               |
| HPSC Ep Team 2020c   | Ireland                             | To 27APR2020 | 19,723 confirmed cases. Median age 49 range 0 to 106 years.                              | Hospitalisation in 2,669 of 19,723 (13.5%) of cases. ICU in 355 of 19,723 cases (1.7 %)                                                     |  |                                                                                           | 962 (4.9 %) died<br><i>Data includes HPSC Ep Team 2020a 2020b and 2020c and 2020d above</i>                                                               |
| HPSC Ep Team 2020d   | Ireland                             | To 04MAY2020 | 21,908 confirmed cases. Median age 49 range 0 to 106 years.                              | Hospitalisation in 2,878 of 21,908 (13.1%) of cases. ICU in 373 of 21,908 cases (1.7 %)                                                     |  |                                                                                           | 1,128 (5.1 %) died<br><i>Data includes HPSC Ep Team 2020a 2020b and 2020c and 2020d and 2020e above</i>                                                   |

836

837

838

839

840

841

842

843

844

845

846

847



848

849

Table 2. A summary of published articles and reports relating to length of stay in a non ICU settings following COVID-19 infection, by country.

| Paper                                           | Location                 | Timing                 | Demographics                                                                                                                                                                                                                                                           | LOS, median (days), IQR                                                                                                                                | Outcomes                                                                                                                               | Comments                                                                                                     |
|-------------------------------------------------|--------------------------|------------------------|------------------------------------------------------------------------------------------------------------------------------------------------------------------------------------------------------------------------------------------------------------------------|--------------------------------------------------------------------------------------------------------------------------------------------------------|----------------------------------------------------------------------------------------------------------------------------------------|--------------------------------------------------------------------------------------------------------------|
| <b>China</b>                                    |                          |                        |                                                                                                                                                                                                                                                                        |                                                                                                                                                        |                                                                                                                                        |                                                                                                              |
| Guan et al., 2020 PR                            | China 30 provinces       | To 31JAN2020           | 1099 patients. Median age 47 (range 35-58) 41.9 % female                                                                                                                                                                                                               | 11, 10 – 13 non severe 13, 11.5 to 17 severe                                                                                                           | 15 (1.4 %) died 93 % continued hospitalisation                                                                                         |                                                                                                              |
| Zhou et al., 2020 PR                            | Wuhan, China             | To 31JAN2020           | 191 patients. Median age 56 (IQR 46 – 67) Non surv (median 69 yrs) Surv (median 52 yrs) Pre-existing 48 %                                                                                                                                                              | 11, 7 – 14 All 7.5, 5 – 11 Non surv 12, 9 – 15 Surv                                                                                                    | 54 (28 %) of 191 died 132 (72 %) discharged                                                                                            | Median duration of shedding 20 days (longest 37 days)                                                        |
| Linton et al., 2020 PR                          | China                    | To 31JAN2020           | Onset to hospital admission: Living n = 155 Dead n= 34 Hospital admission to death n= 29 Male 58 %, age range 30 – 59 (9 missing)                                                                                                                                      | 8.8, CI 7.2 – 10.8 died only, n = 34                                                                                                                   |                                                                                                                                        | Article that collated data from open source and news reports                                                 |
| Wang et al., 2020 JAMA. PR                      | Wuhan, China             | 01JAN2020 to 03FEB2020 | 138 patients, median age 56, IQR 42 - 68, range 22- 92 yrs. 75 (54.3 % male. Hospital assoc. transmission suspected 40 (29 %) HCW and 17 (12.3 %) hospitalized patients. ICU patients n = 36 older median age 66 vs 51, underlying conditions 26 (72 %) vs 38 (37.3%). | 10, 7 to 14 discharged n = 47                                                                                                                          | 6 patients (4.3 %) died 47 (34.1%) discharged remainder hospitalised at study cut off.                                                 |                                                                                                              |
| Cao et al., 2020                                | Wuhan China              | 18JAN2020 to 03FEB2020 | 199 patients; age 58, 49 – 68. 120 (60 %) male.                                                                                                                                                                                                                        | 15, 12 - 17                                                                                                                                            | 44 (22.1 %) died                                                                                                                       | open-label, individually randomized, controlled trial                                                        |
| Fan et al., 2020 Pre-print                      | Wuhan China              | 30DEC2019 to 16FEB2020 | 101 patients, mean age 65.5 years (range 24 to 83). 64 males, 37 females. All died. Majority underlying, 25.7 % two conditions.                                                                                                                                        | Days in general ward 0 (0 to 4 days). 54 of 101 transferred to ICU                                                                                     | All died – criteria for inclusion was death                                                                                            | Early paper - 57 patients lab confirmed, 44 clinically consistent                                            |
| Yuan et al., 2020 PR                            | Zhenzhen China           | 11JAN2020 to 13FEB2020 | 94 discharged patients with COVID-19 infection Median age 40 (range 1 to 78 years). Males accounted for 42 of 94 cases.                                                                                                                                                | mean 14.3 (CI 13.6 - 15.0) All 12.9 (CI 11.4 - 14.4) moderate n = 8 16.4 (CI 14.8 - 17.9) Severe cases n = 11                                          |                                                                                                                                        | All 94 patients discharged. Inclusion criterion.                                                             |
| Wang et al., 2020-04-21 rePrint                 | Sichuan China            | 16JAN2020 to 04MAR2020 | 538 lab confirmed COVID. Median age 45 (271 (50%) were over 45). 285 (53 %) were male. 450 (84 %) classified mild illness.                                                                                                                                             | 19, 14 – 23 (all) 21, 14 – 24 Over 45 yrs 18, 13 – 22 Under 45 yrs 19, 14 – 24 Male 19, 14 – 23 Female 19, 14 – 23 Mild cases 23, 15 – 26 Severe cases |                                                                                                                                        | 364 of 538 discharged 174 unresolved or died                                                                 |
| Zeng et al., 2020                               | Beijing and Wuhan, China | 05FEB2020 to 20MAR2020 | 137 mild patients. Median age 52 (40 – 64) years. 74 (54 %) male.                                                                                                                                                                                                      | 25, 14 – 33 Mild LOS severe cases not reported                                                                                                         |                                                                                                                                        |                                                                                                              |
| <b>Korea</b>                                    |                          |                        |                                                                                                                                                                                                                                                                        |                                                                                                                                                        |                                                                                                                                        |                                                                                                              |
| Ki et al., 2020 Epi Health Special Article      | Korea                    | 20JAN2020 to 10FEB2020 | 28 patients; 15 (53.6 % male. Med age 42 yrs, range 21-73.                                                                                                                                                                                                             | Dx to discharge: 12.5, range 7 to 17.                                                                                                                  |                                                                                                                                        | 3 asymptomatic 4 discharged other continue hospitalisation – none listed as serious at study cut off.        |
| <b>Macau</b>                                    |                          |                        |                                                                                                                                                                                                                                                                        |                                                                                                                                                        |                                                                                                                                        |                                                                                                              |
| Lo et al., 2020 Int J Biol Sci PR               | Macau                    | 21JAN2020 to 16FEB2020 | 10 cases. Median age 54 years (IQR 27 to 64). Two patients were assigned a mild classification, four moderate and four severe. 5 of 10 pre-existing condition.                                                                                                         | 20, 19 – 21                                                                                                                                            |                                                                                                                                        | 5 remained hospitalised at study cutoff                                                                      |
| <b>Italy</b>                                    |                          |                        |                                                                                                                                                                                                                                                                        |                                                                                                                                                        |                                                                                                                                        |                                                                                                              |
| COVID-19 Surveillance Group, 2020 Health report | Italy                    | Up to 29APR2020        | 25,452 deceased patients. Median age was 81 years (IQR 73 to 87). Females 9,684 (38 %). Overall, 3.8 % presented with a no pre-existing condition, 14.5 % with 1, 21.4 % with 2, and 60.3 % with 3 or more.                                                            | 5 , variation not presented                                                                                                                            | All patients died (n = 25,452). ARDS in 97.1 % of cases, acute renal failure in 23,3 %. Superinfection 12.6 % and acute cardiac injury | All patients died; inclusion criterion it is not clear what number of patients were transferred to ICU care. |

|                         |                                              |                           | Number of patients transferred to ICU not reported.                                                                                                                                                                                                                                                                                                 |                                                                                                                              | in 10.9 % of cases.                                                                                                           |                                                                                                                                                                                                            |
|-------------------------|----------------------------------------------|---------------------------|-----------------------------------------------------------------------------------------------------------------------------------------------------------------------------------------------------------------------------------------------------------------------------------------------------------------------------------------------------|------------------------------------------------------------------------------------------------------------------------------|-------------------------------------------------------------------------------------------------------------------------------|------------------------------------------------------------------------------------------------------------------------------------------------------------------------------------------------------------|
| <b>USA</b>              |                                              |                           |                                                                                                                                                                                                                                                                                                                                                     |                                                                                                                              |                                                                                                                               |                                                                                                                                                                                                            |
| Paranjpe et al., 2020   | USA<br>New York<br>City                      | 27FEB2020 to<br>02APR2020 | 2,199 COVID-19 positive hospitalised patients. Median age 65, 75 if died, 59 if discharged. Pre-existing conditions in 46 % of discharged, 64 % of died patients.                                                                                                                                                                                   | 7.7, variation not presented                                                                                                 | Of 1,078 with resolved status; 768 (71 %) discharged, 310 (29 %) died.                                                        | All patients hospitalised, 36 % admitted to ICU, no LOS specific to ICU presented. Suggests LOS accounts for censored data (50% completed stay).                                                           |
| Petrilli et al., 2020   | New York<br>USA                              | 01MAR2020 to<br>02APR2020 | 4,103 positive cases, of which 1,999 hospitalised. mean 52 yrs (36 – 65). 2072 (50.5 %) male. 1,999 hospitalised, 650 critical, 116 died or hospice, 534 to ICU.                                                                                                                                                                                    | 4.8, 3.3 – 7.6 (if resolved)                                                                                                 | 292 of 1,999 (14.6 %) died or transferred to hospice. 981 followed to discharge                                               | 1,999 of 4,103 positive were hospitalised.                                                                                                                                                                 |
| Richardson et al., 2020 | USA,<br>New York                             | 01MR2020 to<br>04APR2020  | 5,700 patients. Sequentially hospitalised. Median age 63, 52 – 75 yrs. 2263 (39.7 %) female.                                                                                                                                                                                                                                                        | 4.1, 2.3 – 6.8<br><br>3.9, 2.4 – 6.7 discharged<br>4.8, 2.3 – 7.4 died                                                       | 553 of 2,634 (21 %) died                                                                                                      | 2,634 of 5,700 admitted followed to death or discharge                                                                                                                                                     |
| Argenziano et al., 2020 | USA,<br>New York                             | 01MAR2020 to<br>05APR2020 | 1000 patients. 150 ED only treatment, 614 admitted to general wards, 236 to ICU.<br><br>Median age (all) 63, 50 75. 596 (60 %) male. Only 82 (8.2 %) no pre-existing conditions. 75 % BMI > 25.<br><br>Median age (n = 614 hospitalised non icu) 64, 51 – 77. 353 of 614 (57.5 %) male. 57 of 614 (9.3 %) no pre-existing conditions. 75 % BMI > 25 | 6, 3 – 14 All n=1,000<br>4, 2 – 8 Hospitalised non icu                                                                       | At cutoff 90 (9 %) continuing care 699 (70 %) discharged; 211 (21.1 %) died.<br><br>86 of 614 (14 %) hospitalised cases died. | Of the 150 ED only patients; 85 % discharged, 14.7 % died before admission.                                                                                                                                |
| Badawi et al., 2020     | USA<br>New York<br>City                      | 23MAR2020 to<br>06APR2020 | Mean age 63.7 (SD +/- 14.3). 312 (67 %) male.                                                                                                                                                                                                                                                                                                       | 6, 3 – 10 (including ICU)                                                                                                    |                                                                                                                               | Study examined ICU occupancy. During pandemic - DRS highest reached 37.5 (1.5 – 71.5) versus 0.9 (0.2 to 7.1; pre pandemic. Last DRS before ICU discharge: 17.5 (0.8 – 71) vs 0.3 (0.1 – 1.2 pre-pandemic. |
| Lewnard et al., 2020    | USA<br>California and<br>Washington<br>state | To<br>09APR2020           | 1,277 patients. Median age 60, 47 – 72. 56.8 % male. 817 of 1,299 (64 %) completed stay.                                                                                                                                                                                                                                                            | Mean reported 11.3, IQR 5.1 – 15.6, normal range (NR) 0.9 – 31.3 All 10.7 (surv) NR 0.8 – 30.1 13.7 (non surv) NR 1.7 – 34.6 | Mortality at cutoff 09APR 119 of 772 (15.4 %).                                                                                | Adjusted for censored data                                                                                                                                                                                 |

850

851

852

853

854

855

856

857

858

859

860  
861

Table 3. A summary of published articles and reports relating to length of stay in an ICU setting following COVID-19 infection, by country.

| Paper                                           | Location       | Timing                 | Demographics                                                                                                                                                                                                                                                    | ICU; LOS median (days), IQR                                                                                           | Outcomes                                                                                                                                                                                                                     | Comments                                                                                                                                              |
|-------------------------------------------------|----------------|------------------------|-----------------------------------------------------------------------------------------------------------------------------------------------------------------------------------------------------------------------------------------------------------------|-----------------------------------------------------------------------------------------------------------------------|------------------------------------------------------------------------------------------------------------------------------------------------------------------------------------------------------------------------------|-------------------------------------------------------------------------------------------------------------------------------------------------------|
| <b>China</b>                                    |                |                        |                                                                                                                                                                                                                                                                 |                                                                                                                       |                                                                                                                                                                                                                              |                                                                                                                                                       |
| Chen et al., 2020                               | Wuhan, China   | 01JAN2020 to 20JAN2020 | 99 patients. Mean age 55.5 (SD 13.1), 67 male, 32 female. 50 (51 %) chronic conditions.                                                                                                                                                                         | 9 and 11 days ICU n= 2 both died                                                                                      | 11 (11%) died<br>31 (31 %) discharged<br>57 (58 %) still hospitalized by study cut off                                                                                                                                       | Lab confirmed                                                                                                                                         |
| Zhou et al., 2020 PR                            | Wuhan, China   | To 31JAN2020           | 191 patients. Median age 56 (IQR 46 – 67)<br>Non surv (median 69 yrs)<br>Surv (median 52 yrs)<br>Pre-existing 48 %                                                                                                                                              | 8, 4 – 12 ICU<br>7, 2 -9 Surv<br>8, 4 -12 Non surv                                                                    | 54 (28 %) of 191 died<br>132 (72 %) discharged                                                                                                                                                                               |                                                                                                                                                       |
| Yang et al., 2020                               | Wuhan, China   | DEC 2019 to 26JAN2020  | 52 critically ill patients of 710 in cohort admitted to ICU. Mean age 59.7 (SD 13.3) years, 35 (67 %) male, 21 (40 %) had pre-existing conditions                                                                                                               | 7, 3–11 ICU to death                                                                                                  |                                                                                                                                                                                                                              | ICU care only included                                                                                                                                |
| Cao et al., 2020                                | Wuhan China    | 18JAN2020 to 03FEB2020 | 199 patients; age 58, 49 – 68. 120 (60 % male).                                                                                                                                                                                                                 | 10, 5 – 14 All<br>10, 8 – 17 Surv<br>10, 4 – 14 non surv                                                              | 44 (22.1 %) died                                                                                                                                                                                                             | open-label, individually randomized, controlled trial                                                                                                 |
| Fan et al., 2020 Pre-print                      | Wuhan China    | 30DEC2019 to 16FEB2020 | 101 patients, mean age 65.5 years (range 24 to 83). 64 males, 37 females. All died. Majority underlying, 25.7 % two conditions.                                                                                                                                 | 47 of 101 direct to ICU:<br>8, 4 to 11.                                                                               | All died                                                                                                                                                                                                                     | 57 patients lab confirmed, 44 clinically consistent, all died                                                                                         |
| <b>Singapore</b>                                |                |                        |                                                                                                                                                                                                                                                                 |                                                                                                                       |                                                                                                                                                                                                                              |                                                                                                                                                       |
| Young et al., 2020 Case series                  | Singapore      | To 25FEB2020           | 2 of 18 admitted to ICU. Median age was 47 yrs, 50 % male, 50 % female                                                                                                                                                                                          | Mean 6 (range 5 – 7)                                                                                                  |                                                                                                                                                                                                                              |                                                                                                                                                       |
| <b>Italy</b>                                    |                |                        |                                                                                                                                                                                                                                                                 |                                                                                                                       |                                                                                                                                                                                                                              |                                                                                                                                                       |
| Graselli et al. 2020b PR                        | Lombardy Italy | 20FEB2020 to 18MAR2020 | 1,591 patients admitted to ICU, with 1,581 ICU info available                                                                                                                                                                                                   | 9, 6 – 13; All<br>10, 8 – 14; continuing care n = 920<br>8, 5 – 12; discharged n = 256<br><br>7, 5 – 11; died n = 405 | ICU mortality 26 %.<br>64 + yrs (n = 786) 36 % died<br>63 or younger (n = 795) 15 % died.<br>At study cut off:<br>405 of 1,581 (26 %) died in ICU<br>256 of 1,591 (16 %) discharged<br>920 of 1,591 (58 %) continued in ICU. | ICU patients only; inclusion criterion                                                                                                                |
| COVID-19 Surveillance Group, 2020 Health report | Italy          | Up to 29APR2020        | 25,452 deceased patients. Median age was 81 years (IQR 73 to 87). Females 9,684 (38 %). Overall, 3.8 % presented with a no pre-existing condition, 14.5 % with 1, 21.4 % with 2, and 60.3 % with 3 or more. Number of patients transferred to ICU not reported. | 8 (if included ICU care; IQR or range not presented).                                                                 | All patients died. ARDS in 97.1 % of cases, acute renal failure in 23.3 %. Superinfection 12.6 % and acute cardiac injury in 10.9 % of cases.                                                                                | All patients died; inclusion criterion It is not clear what number of patients were transferred to ICU care.                                          |
| <b>Switzerland</b>                              |                |                        |                                                                                                                                                                                                                                                                 |                                                                                                                       |                                                                                                                                                                                                                              |                                                                                                                                                       |
| Ceruti et al., 2020                             | Switzerland    | 14MAR2020 to 12APR2020 | 41 ICU patients. mean age 64 (-16.5) years, 35 (85 %) male.                                                                                                                                                                                                     | 9, 4 – 12.5; discharged                                                                                               | 10 died (24 %); 2 transferred out; 24 (61 %) discharge                                                                                                                                                                       | 41 patients admitted to ICU from 310 at clinic. 34 (83 %) required mechanical ventilation. 25 (61 %) to discharge. Median duration of MV 7, 3 – 10 d. |
| <b>UK</b>                                       |                |                        |                                                                                                                                                                                                                                                                 |                                                                                                                       |                                                                                                                                                                                                                              |                                                                                                                                                       |
| ICNARC, 2020a 08MAY2020                         | UK             | Up to 08MAY2020        | 8,250 Patients. Age 60, 51 – 67. 5,879 (72%) Male. 5,580 of 7,594 (73 %) patients had BMI ≥ 25.                                                                                                                                                                 | ICU:<br>8, 3 – 17; Surv n = 3,271<br>8, 4 – 14; Non surv, n = 2,872                                                   | 6,143 of 8,250 completed ICU care: 3,271 of 6,143 (55 %) alive                                                                                                                                                               | 4,861 of 8,250 (64%) mechanical vent within 24 hrs<br>APACHE II score 14,                                                                             |

|                                       |                                        |                        |                                                                                                                                                                                                                                                                                         |                                                                    |                                                                                                                              |                                                                                                                                                                                                            |
|---------------------------------------|----------------------------------------|------------------------|-----------------------------------------------------------------------------------------------------------------------------------------------------------------------------------------------------------------------------------------------------------------------------------------|--------------------------------------------------------------------|------------------------------------------------------------------------------------------------------------------------------|------------------------------------------------------------------------------------------------------------------------------------------------------------------------------------------------------------|
|                                       |                                        |                        |                                                                                                                                                                                                                                                                                         | 1, 0 to 3 Pre ICU LOS, n = 7,524                                   | 2,872 of 6,143 (47 %) died                                                                                                   | 11 – 18; n = 7,835                                                                                                                                                                                         |
| <b>USA</b>                            |                                        |                        |                                                                                                                                                                                                                                                                                         |                                                                    |                                                                                                                              |                                                                                                                                                                                                            |
| Kujawski et al., 2020                 | USA<br>6 States<br>6 of 12<br>CA       | 20JAN2020 to 05FEB2020 | 12 patients. Median age 53 yrs (range 21 to 68). 8 male. 4 of 5 with underlying conditions hospitalised                                                                                                                                                                                 | 5                                                                  | 11 of 12 discharged or remained home isolation<br>1 remained hospitalized at study cut off (patient who was admitted to ICU) | Case series n = 12.                                                                                                                                                                                        |
| Bhattraju et al., 2020<br>Case Series | Seattle, USA                           | 24FEB2020 to 09MAR2020 | 24 Patients. Mean age 64 ± 18 yrs, 63 % male                                                                                                                                                                                                                                            | 9, 4 to 14 All ICU<br>14, 4 – 17 Surv only                         |                                                                                                                              | All ICU, inclusion criterion<br>12 of 24 died<br>Surv only:<br>5 discharged home<br>4 discharged to general wards<br>3 remained on mechanical ventilation                                                  |
| Cummings et al., 2020                 | US, New York                           | 02MAR2020 to 01APR2020 | 257 of 1,150 hospitalised patients categorised critical. Median age 62, 51 – 72. 170 of 257 ((66 %) male. 82 % at least one pre-existing condition.                                                                                                                                     | 8, 5 – 12 (died only)                                              | 86 of 257 (33 %) died in hospital. 122 of 257 continuing care. 4 transferred. 45 of 257 discharged alive.                    | 201 of 257 received invasive mechanical ventilation. 13, 9 – 17 d.                                                                                                                                         |
| Petrilli et al., 2020                 | New York USA                           | 01MAR2020 to 02APR2020 | 4,102 hospitalised patients . mean 52 yrs (36 – 65). 2072 (50.5 %) male. 1,999 hospitalised, 650 critical, 116 died or hospice, 534 to ICU.                                                                                                                                             | 6, 3 – 9 (discharge or died)<br>11.4, 8.4 – 15.4 (continuing care) | Of 534 to ICU, 176 died or to hospice, 49 discharged, 309 continuing care                                                    | 1,999 of 4,103 positive were hospitalised.                                                                                                                                                                 |
| Argentzia no et al., 2020             | New York USA                           | 01MAR2020 to 05APR2020 | 1000 patients. 150 ED only treatment, 614 admitted to general wards, 236 to ICU.<br><br>Median age (all) 63, 50 75. 596 (60 %) male. Only 82 (8.2 %) no pre-existing conditions. 75 % BMI > 25.2.<br><br>Median age (ICU n = 236) 62, 52 – 72. 158 of 236 (67 %) male. 75 % BMI > 25.7. | 23, 12 – 32 includes ICU                                           | At cutoff<br>87 (37 %) continuing care<br>46 (20 %) discharged;<br>103 (44 %) ICU cases died                                 | Of the 150 ED only patients; 85 % discharged, 14.7 % died before admission.                                                                                                                                |
| Badawi et al., 2020                   | USA<br>New York City                   | 23MAR2020 to 06APR2020 | Data relates to 465 patients. Mean age 63.7 (SD +/- 14.3). 312 (67 %) male.                                                                                                                                                                                                             | 3.8, 1.4 – 7.3<br>4.2, 1.8 – 7.7<br>(Mechanically ventilated)      |                                                                                                                              | Study examined ICU occupancy. During pandemic - DRS highest reached 37.5 (1.5 – 71.5) versus 0.9 (0.2 to 7.1; pre pandemic. Last DRS before ICU discharge: 17.5 (0.8 – 71) vs 0.3 (0.1 – 1.2 pre-pandemic. |
| Lewnard et al., 2020                  | USA<br>California and Washington state | To 09APR2020           | 1,277 patients. Median age 60, 47 – 72. 56.8 % male. 817 of 1,299 (64 %) completed stay. 158 of 617 (25.6 %) admitted to ICU (data not available from Washington State)                                                                                                                 | Mean, IQR<br>8.1, 3.9 – 11.2                                       | Estimates of admissions to ICU 41.9 % (34.1 – 51.4 %)<br>Estimates for ICU fatalities 17.8 % (14.3 – 22.2 %)                 | Adjusted for censored data hence estimates calculated.                                                                                                                                                     |
| <b>Mexico</b>                         |                                        |                        |                                                                                                                                                                                                                                                                                         |                                                                    |                                                                                                                              |                                                                                                                                                                                                            |
| Valente Acosta et al., 2020           | Mexico City                            | 13MAR2020 to 13APR2020 | 33 patients. Mean age 60.6 ± 12.7 years, 23 (70 %) male. 23 (70 %) overweight or obese.                                                                                                                                                                                                 | 7.5, 4.25–8.75 Severe n= 20<br>23, 16–24.75 Critical n = 4         | All survived to study cutoff. 20 of 28 severe discharged; 4 of 8 critical discharged                                         | 91 % swab positive. All admitted to ICU                                                                                                                                                                    |

862

863

864

865

866

867

868

869

870

871

872

873

874

875

876

877

878

879

880

881

882

883

884

885

886

887

888

889

Table 4. A summary of published articles and reports relating to length of hospital stay prior to transfer to ICU following COVID-19 infection, by country.

| Paper                          | Location     | Timing                 | Demographics                                                                                                                                                    | Pre-ICU; LOS median (days), IQR                                                       | Outcomes                                                                                      | Comments                                                                           |
|--------------------------------|--------------|------------------------|-----------------------------------------------------------------------------------------------------------------------------------------------------------------|---------------------------------------------------------------------------------------|-----------------------------------------------------------------------------------------------|------------------------------------------------------------------------------------|
| <b>China</b>                   |              |                        |                                                                                                                                                                 |                                                                                       |                                                                                               |                                                                                    |
| Fan et al., 2020 Pre-print     | Wuhan China  | 30DEC2019 to 16FEB2020 | 101 patients, mean age 65.5 years (range 24 to 83). 64 males, 37 females. All died. Majority with underlying conditions, 25.7 % with two underlying conditions. | 47 of 101 direct to ICU:54 transferred to ICU with aggravating conditions 8, 4 to 11. | All died – criteria for inclusion was death                                                   | Early paper - 57 patients lab confirmed, 44 clinically consistent                  |
| <b>Singapore</b>               |              |                        |                                                                                                                                                                 |                                                                                       |                                                                                               |                                                                                    |
| Young et al., 2020 Case series | Singapore    | To 25FEB2020           | 18 patients. Median age was 47 yrs, 50 % male, 50 % female                                                                                                      | Mean 6 (range 5 – 7)                                                                  | No deaths                                                                                     | 2 patients ICU Main presentation mild respiratory infection                        |
| <b>UK</b>                      |              |                        |                                                                                                                                                                 |                                                                                       |                                                                                               |                                                                                    |
| ICNARC, 2020a 08MAY2020        | UK           | Up to 08MAY2020        | 8,250 Patients. Age 60, 51 – 67. 5,879 (72%) Male. 5,580 of 7,594 (73 %) patients had BMI ≥ 25.                                                                 | 1, 0 to 3 Pre ICU LOS, n = 8,233                                                      | 6,143 of 8,250 completed ICU care: 3,271 of 6,143 (55 %) alive 2,872 of 6,143 (47 %) died     | 4,861 of 8,250 (64% mech vent within 24 hrs APACHE II score 14, 11 – 18; n = 7,835 |
| <b>USA</b>                     |              |                        |                                                                                                                                                                 |                                                                                       |                                                                                               |                                                                                    |
| Kujawski et al., 2020          | USA 6 States | 20JAN2020 to 05FEB2020 | 12 patients. Median age 53 yrs (range 21 to 68). 8 male. 4 of 5 with one or more underlying conditions hospitalised                                             | 5 days                                                                                | 11 of 12 discharged or remained home isolation 1 remained hospitalized at study cut off (ICU) | 1 patient ICU Hospitalised patients worsened clinically in second week.            |
