# 1 Country differences in hospitalisation, length of stay and admission to Intensive Care Units 2 due to SARS-CoV-2 infection: a rapid review of available literature

3

4 Elizabeth A Lane<sup>1,2</sup>, Damien J Barrett<sup>2,5</sup>, Miriam Casey<sup>1</sup>, Conor G. McAloon<sup>3</sup>, Áine B. Collins<sup>1</sup>,  
5 <sup>2</sup>, Kevin Hunt<sup>4</sup>, Andrew W. Byrne<sup>5</sup>, David Mc Evoy<sup>6</sup>, Ann Barber<sup>1</sup>, John Griffin<sup>1</sup>, Patrick Wall<sup>6</sup>  
6 and Simon J. More<sup>1</sup>

7

8 <sup>1</sup>Centre for Veterinary Epidemiology and Risk Analysis, UCD School of Veterinary  
9 Medicine, University College Dublin, Belfield, Dublin D04 W6F6, Ireland;

10 <sup>2</sup>Department of Agriculture, Food and the Marine, Administration Building, Backweston  
11 Campus, Celbridge, Co. Kildare, Ireland;

12 <sup>3</sup>Section of Herd Health and Animal Husbandry, UCD School of Veterinary Medicine,  
13 University College Dublin, Dublin D04 W6F6, Ireland;

14 <sup>4</sup>School of Biosystems and Food Engineering, University College Dublin, Belfield, Dublin  
15 4, Ireland;

16 <sup>5</sup>One Health Scientific Support Unit, Department of Agriculture, Food and the Marine,  
17 Kildare Street, Dublin 2;

18 <sup>6</sup>School of Public Health, Physiotherapy and Sports Science, University College Dublin,  
19 Belfield, Dublin 4, Ireland.

20

21 Running title: Country differences in hospitalisation and length of stay following SARS-CoV-2  
22 infection

23

24 Corresponding author: Elizabeth A Lane

25 Tel: Int-353-01-5058706; Mobile: Int-353-87-2433849

26 Email: [Elizabeth.lane@ucd.ie](mailto:Elizabeth.lane@ucd.ie)

NOTE: This preprint reports new research that has not been certified by peer review and should not be used to guide clinical practice.

## Abstract

**Objectives:** Coronavirus disease (COVID-19) caused by the SARS-CoV-2 virus is spreading rapidly worldwide and threatening the collapse of national health care systems. The development of effective resource models are critical for long term health planning. The aim was to evaluate the available literature, to consider parameters affecting hospital resources, to effectively guide health policy and planning. **Design:** A detailed search of the literature, using Google Scholar, PubMed, MedRxiv and BioRxiv, was conducted for the time period 01-DEC-2019 to 04-MAY-2020; using appropriate keywords: resultant articles were scrutinised in detail, and appraised for reported data pertaining to hospitalization and hospital length of stay (LOS). **Results:** Disease presentation was described in China; 81 % mild, 14 % moderate and 5 % severe. The experience, thus far, in Europe and the USA are suggestive of a higher degree of severity. Initial reports suggest high hospitalisation and ICU admittance rates. More recent reports from the ECDC lower this estimation. Perhaps the relative age, the level of pre-existing conditions, and other health factors may be contributors to differences. Data from Irish cases suggest hospitalisation rate may be lower in parts of Europe and time dependent. Hospital LOS is described in seventeen articles, with median lengths of stay between 4 and 25 days. The evidence regarding the LOS in ICU is reported in eighteen studies, fifteen deemed relevant. The majority of studies report ICU LOS between 7 to 10 days. Many of these studies are likely skewed towards shorter stay due to study cut-off dates. Indications based on ICU LOS reported for patients continuing care suggest median ICU stay will be longer. **Conclusions:** These parameter estimates are key to the development of an effective health care resource model. Based on our rapid appraisal of the literature, it is essential that Europe manages mitigation measures to ensure that hospital and ICU capacity does not become overwhelmed to manage this pandemic long term.

**Keywords:** Hospitalisation, Length of Stay, Hospital stay, ICU, SARS-CoV-2, COVID-19

53

## 54 **Contents**

55 1. Introduction

56 2. Materials and methods

57 2.1 *Initial study appraisal*

58 2.2 *Study appraisal*

59 2.3 *Data sources and management*

60 3. Results

61 3.1 Hospitalisation rate

62 3.2 Length of stay (LOS)

63 3.2.1 *Length of stay in hospital (non-ICU)*

64 3.2.2 *Length of stay in ICU*

65 3.2.3 *Length of stay pre transfer to ICU*

66 3.2.4 *Length of stay post ICU*

67 4. Discussion

68 4.1 Hospitalisation rate

69 4.2 Length of stay (LOS)

70 5. Limitations of this rapid review

71 6. Conclusions

72 7. Conflict of interest statement

73 8. Funding

74 9. References

75

76

77

78

## 1. INTRODUCTION

Coronavirus disease (COVID-19) caused by the SARS-CoV-2 virus is spreading rapidly across the world, threatening the collapse of many national health care systems and exerting a grave impact on the global economy. As of 9<sup>th</sup> May 2020, data compiled from the European Centre for Disease Prevention and Control (ECDC) reported 3,898,658 confirmed infections of COVID-19 cases worldwide with 274,290 deaths recorded. The SARS-CoV-2 virus, first detected in December 2019, in Wuhan China, has spread to 212 countries and territories. By 9<sup>th</sup> May 2020, European countries, including the European Union (EU)-27, the UK, Norway, Switzerland and Iceland have reported 1,259,681 cases and 147,085 deaths following infection with SARS-CoV-2 infection (ECDC, 2020).

Clinical presentations of COVID-19 range from asymptomatic to life threatening and fatal (World Health Organisation (WHO), 2020); Wu and McGoogan (2020) outlined the spectrum of disease of COVID-19 in China; 81 % were mild; 14 % severe and 5 % critical. The experience in European countries has differed, and varied among countries. The eight update Report from the ECDC (2020a) indicates that up to 30 % of diagnosed COVID-19 cases were hospitalised in some countries. Individual studies from Italy (Cereda et al., 2020; Grasselli et al., 2020) indicated a higher proportion were accessing ICU care, with 16 and 18 % of all COVID-19 patients being cared for in an ICU setting. However, the European wide analysis report (ECDC, 2020a) suggests severe illness requiring respiratory support or ICU care has accounted for 2.4 % cases, the most recent report; the ninth update (ECDC, 2020b) lowers this estimate (median 2 %).

Worldwide, age and co-morbidities have been demonstrated as major risk factors for the development of severe disease (Chen et al., 2020; ECDC, 2020a; 2020b; COVID-19 Surveillance Group, 2020; Gang et al., 2020; Paranjpe et al., 2020; Qian et al., 2020;

Richardson et al., 2020; Russell et al., 2020; Wu and McGoogan, 2020). Children are implicated as possible asymptomatic carriers of SARS-CoV-2 virus and a number of articles report both symptomatic and asymptomatic infection in children (Chan et al., 2020; Hu et al., 2020; Korean Society of Infectious Diseases et al., 2020; Liao et al., 2020; Qiu et al., 2020; Tao et al., 2020; Wu and McGoogan 2020). Many, but not all (Korean Society of Infectious Diseases 2020), studies indicate a higher proportion of cases are male (Chen et al., 2020; ECDC, 2020a; 2020b; Fan et al., 2020; Linton et al., 2020; COVID-19 Surveillance Group, 2020; ICNARC, 2020a; 2020b); and recent risk assessments conducted by the ECDC (ECDC, 2020a; 2020b) indicates that males are at higher risk of death compared with their female contemporaries. Close contact with a case is a risk factor (WHO, 2020), and the basis of public health advice includes social distancing and staying at home apart from essential activity (ECDC, 2020a). Bi et al. (2020) reports that household contacts (Odds Ratio 6) and those travelling with a case were at higher risk of infection (OR 7) than other close contacts. Other factors, including smoking (Vardavas and Nikitara, 2020) have been highlighted as risk factors for severe infection. There are indications too that infection rate may be altered by blood-group (Fan et al., 2020; Zhao et al., 2020).

The prevention of infection among health care workers is of critical importance to the management of this pandemic. Of serious concern to policymakers is the clear evidence indicating that both healthcare workers and hospitalised persons are at particularly high risk of exposure (WHO 2020; Istituto Superiore di Sanità 2020). Indeed some of the work conducted early in the epidemic reported hospital-associated transmission of virus was suspected in 41% of patients (Wang et al., 2020; n= 138). Of concern too, many healthcare authorities are bringing retired medics and nurses back into service. The placement of these people considered vulnerable due to their age must be considered. At a national level, the

latest work by Stier et al. (2020) emphasizes population density, with attack rates increasing with city size.

Preparedness is key and resource matching to clinical requirement essential. Previous work (Rhodes et al., 2012) suggests a large variation in availability of critical care bed in the EU / EEA area, ranging from 29.2 in Germany to 4.2 critical care beds per 100,000 population in Portugal. Perhaps this is key to understanding the difference in coping between different EU countries. Clearly too, differences will exist between cultures, few western governments will seek to use hospitalisation as a tool for quarantine. As the infection is spreading across the world; this rapid review paper considers parameters affecting hospital resources resulting from infection with SARS-CoV-2 beyond the evidence published from China. The objective is to evaluate the current scientific literature from across the developed world with the overall aim to influence health policy and support evidence-based decision-making. The proportion of patients hospitalized due to infection with SARS-CoV-2 infection is discussed. The proportion of patients who required critical or ICU care is outlined. Time spent hospitalised; both in a general and an ICU setting is considered. For those who have been admitted to an ICU, the length of time pre ICU, the length of time in ICU and the length of time post ICU to discharge or death was collated from available literature. These estimates are central to national resource modelling, which are being developed to aid policymakers to ensure optimal resourcing during this pandemic.

## **2. MATERIALS AND METHODS**

### *2.1 Initial study appraisal*

This paper follows the Preferred Reporting Items for Systematic Reviews and Meta-Analyses—Extension for Scoping Reviews (PRISMA-ScR) checklist (Tricco et al., 2018). A comprehensive search of the scientific literature and national and international government

reports was conducted by contributing researchers for the time period 1<sup>st</sup> December 2019 to 4<sup>th</sup> May 2020. The search engines Google Scholar, PubMed, MedRxiv and BioRxiv were used, using the following keywords: (“Novel coronavirus” OR “SARS-CoV-2” OR “2019-nCoV” OR “COVID-19”) AND (“length of stay” OR “duration of stay” OR “hospital stay” OR “ICU”). No restriction on language was imposed as long as the abstract was available in English. References within these publications were also searched as additional possibilities for inclusion. Inclusion criteria for ‘the proportion of cases hospitalised’ were papers that reported the proportion of hospitalised and proportion of those hospitalised accessing higher level care including critical care and intensive care unit (ICU) care. Inclusion criteria for ‘length of stay’ (LOS) included articles that reported length of hospital stay, length of stay in ICU, length of stay prior to admission to ICU, and articles that referenced length of stay post discharge from ICU to a general hospital setting. Each article was assessed briefly for suitability for inclusion in this study. Papers that did not report length or duration of time in hospital or in ICU were discarded. The latest governmental reports from the Health Protection Surveillance Centre (HPSC), Ireland, and from the Intensive Care National Audit and Research Centre (ICNARC, 2020a), UK were consulted after the 4<sup>th</sup> May cut-off.

## 2.2 Study appraisal

All articles and reports that described the proportion of COVID-19 positive cases hospitalised, the proportion of cases that were admitted to higher level care including critical or ICU care, the length of hospital stay or the duration of hospital stay or length of time in critical care or ICU were scrutinised in detail, and appraised for reported data and quality of the scientific evidence. Parameter estimates for the length of stay in non-ICU or in an ICU setting from the relevant articles were recorded and evaluated.

For quality control, studies were (1) selected from search terms outlined above and initially screened by three members of the team (*KH, SM and LL*), with parameters identified and recorded; (2) reviewed and supplemented by manual search by *LL*, again with parameters identified and recorded. (iii) Finally, the review was then internally reviewed by an additional three members of the team (*SM, DB, MC*), and cross-referenced with other parameter synthesis documents being developed by the group (*all authors*). Details of the resultant list ( $n = 179$ ), which included published and pre-printed articles, were entered in an Excel file.

Eighteen studies relating to hospital LOS and fifteen studies or reports relating to LOS in ICU were selected for detailed scrutiny as they each reported summary estimates with a corresponding variance. The Italian report (COVID-19 Surveillance Group, 2020) was the only report without an estimate of variance that was considered for detailed scrutiny, as the study population was significant ( $n = 25,452$ ).

### 2.3 Source data and management

Data tabulating the daily number of notified cases and deaths for all countries and Territories worldwide was downloaded in Excel format from the European Centre for Disease Prevention and Control (ECDC) and may be accessed at: <https://www.ecdc.europa.eu/en/publications-data/download-todays-data-geographic-distribution-covid-19-cases-worldwide>. Data was imported into STATA version 14 (STATA Corporation, USA). Cumulative cases and deaths were generated for each calendar day for countries of interest, and expressed as a percentage of cumulative deaths to cumulative cases. The crude mortality rate was expressed as a percentage over time, from day of outbreak, defined as the day on which the tenth case was reported, in selected European Countries.



Data regarding the epidemiological situation in Ireland was extracted from the Health Protection Surveillance Centre daily epidemiological reports. These may be accessed at: <https://www.hpsc.ie/a-z/respiratory/coronavirus/novelcoronavirus/casesinireland/epidemiologyofcovid-19inireland/>. Data were entered into Excel, then imported into STATA 14 to generate the trends in cumulative cases, percentage of known cases hospitalised and the percentage of confirmed cases admittance into ICU over time.

### 3. RESULTS

#### 3.1 HOSPITALISATION RATE

A summary of available scientific literature from the outbreaks worldwide relating to the proportion of COVID-19 cases requiring hospitalisation and the need for stepped up medical care, including critical care and ICU, by country, is presented in Table 1. Data from 33 studies or reports are presented.

<< Insert Table 1 here >>

*European Centre for Disease Prevention and Control (ECDC updates)*

The European Centre for Disease Prevention and Control (ECDC) collates the laboratory-confirmed cases reported to the European Surveillance System (TESSy) and thus far has published nine update reports as the situation unfolds across Europe (ECDC, 2020a; 2020b). Preliminary estimates of severity were collated based on the analysis of data from EU and EEA countries and from the UK. As expected some data were incomplete or missing in TESSy. The eight update (ECDC, 2020a) indicates that 48,755 of 152,375 (32 %) were hospitalised based on data from 26 European countries; with a country median 28 % (IQR 14 to 63 %). Severe presentations that required ICU and or respiratory support accounted for 2,859 of

120,788 (2.4 %) cases from 16 countries; median 1.4 % (IQR 0 to 33 %). Among hospitalized cases only, severe illness was reported in 3,567 of 38,960 (9.2 %) cases from 19 countries, median 15 % (IQR 3.8 to 35 %). Death occurred in 1,005 of 9,368 (11 %) of hospitalized cases from 21 countries (3.9 %, IQR 0 to 13 %). Age-specific risk increased among those 60 years and older, thus consideration to age profile within a country is important. The latest report on 23<sup>rd</sup> April reported increased rate of hospitalisation with a pooled estimate of 42 % (160,485 of 381,410 cases); based on data from 19 countries, however the country median was 28 % (IQR 16 to 39 %). Severe presentations that required ICU and or respiratory support accounted for 5,456 of 220,412 (2 %) cases with data from 14 countries; median 2 % (IQR 0 to 4 %). Again, hospitalisation increased with age, and for males from 30 years. The changes over time in the crude mortality rate for all notified cases since day of outbreak, defined as the day on which the tenth case was notified, for selected European countries is presented in Figure 1.

<< Insert Figure 1 here >>

#### *USA Studies*

Admission rates to ICU in the USA varied between 4.9 to 11.5 % (CDC COVID-19 Response Team, 2020) report. Myers et al. (2020) indicated 8.7 % ICU admission in a study conducted in California in March. While Lewnard et al., (2020) observed a higher ICU admission rate (25.6 %) also in California. A number of studies conducted in New York outlined ICU admission rates of 14.2 % (Richards et al., 2020); 22 % (Cummings et al., 2020); 23.6 % (Argenziano et al., 2020); and 36% (Paranjpe et al., 2020). Of significance, are the mortality rates in hospitalised groups (and specifically not ICU only groups) reported in a number of US studies: 15.4 % Lewnard et al., (2020); 15.6 % Myers et al., 2020; 21 %; Richards et al., 2020; 21 %; Argenziano et al., 2020; and 29 % Paranjpe et al 2020.

In Ireland, the proportion of COVID-19 test positives cases (confirmed cases) hospitalised is reducing with time (Figure 2). Daily epidemiology reports compiled by the Health Protection Surveillance Centre (HPSC, 2020a) with data to March 30<sup>th</sup> reports a hospitalisation rate of 27.9 % (834 of 2,990 cases hospitalised) and admission to ICU in 4.2 % of cases (126 of 2,990). The hospitalisation rate reduced over time to 17.5 % (1,968 of 11,261) by April 13<sup>th</sup> (HPSC, 2020b); 13.5 % (2,669 of 9,723) by 29<sup>nd</sup> April (HPSC, 2020c); and 13.1 (2,878 of 21,908 cases by 4<sup>th</sup> May (HPSC, 2020d). The rate of admission to ICU reduced, concomitantly, from 4.2 % of cases (126 of 2,990; HPSC 2020a) to 1.7 % (373 of 21,908; HPSC 2020d) of cases by May 4<sup>th</sup>. The reports collated by the HPSC (HPSC Epi Team, 2020) in Ireland indicate that proportion of hospitalisations and transfer to ICU increased occurred with age.

<< Insert Figure 2 here >>

## 3.2 LENGTH OF STAY (LOS)

### 3.2.1 Length of stay in hospital (Non-ICU)

A summary of the literature pertaining to length of hospital stay in non-ICU settings due to COVID-19, by country, is reported in Table 2. The overall length of hospital stay is reported in eighteen studies or reports, with overall median lengths of stay between four days and twenty-five days. Figure 3 illustrates the median (and IQR) ranges of hospital length of stay for relevant articles.

<< Insert Table 2 here >>

<< Insert Figure 3 here >>

### 3.2.2 Length of stay in ICU

The literature pertaining to length of ICU stay due to COVID-19 is reported in Table 3, including eighteen studies and reports. Figure 4 illustrates the median (and IQR) ranges of length of stay in ICU for relevant articles. In this figure, fifteen studies are presented; Three case studies were excluded due to small numbers of relevant cases (Chen et al., 2020; Kujawski et al., 2020; Young et al., 2020). Median lengths of stay in ICU between 7 to 10 days were observed in studies based in China (Cao et al., 2020; Fan et al., 2020; Yang et al., 2020; Zhou et al., 2020). European studies conducted by Graselli et al. (2020) in Italy, Ceruti et al (2020) in Switzerland, and the ICNARC report (2020a) report similar LOS between 7 to 10 days. Earlier reports from the ICNARC (2020b) indicated shorter LOS for ICU patients, indicating the bias towards shorter stay as fewer patients had progress through their complete stay. However median LOS outlined by studies based in North America were more variable and reported lengths of stay between 3.5 to 23 days for various groups (Figure 3).

<< Insert Figure 4 here >>

<< Insert Table 3 here >>

### 3.2.3 Length of hospital stay prior to transfer to ICU

Length of hospital stay prior to transfer to ICU due to COVID-19, by country, is presented in Table 4. Four studies made reference to time in hospital prior to ICU transfer, including two small case series (Young et al., 2020; Kujawski et al., 2020). A long median hospital stay prior to transfer to ICU was described by Fan et al. (2020; median 8 days, IQR 4 to 11 days). The UK ICNARC report (ICNARC 2020a) details a median length of stay of one day (IQR 0 to 3 days); indicating the short duration before stepped up care need is identified in COVID-19 patients.

<< Insert Table 4 here >>

### 3.2.4 Length of hospital post ICU

No eligible studies outlining the length of stay post discharge from ICU were discovered.

## 4. DISCUSSION

### 4.1 HOSPITALISATION RATE

The relative variation in disease severity is very clear in the published literature from China; 81 % mild presentation, 14 % moderate presentation with 5 % severe or critical presentations that require high-level on-going care in critical care beds or within the ICU environment (Wu and Grogan, 2020). Nevertheless, the experience, thus far, in Europe and the USA would suggest some countries are experiencing a higher degree of severity of COVID-19 being reported. Early indications from Italy suggested hospitalisation rates of 30 % and admission to ICU between 16 to 18 % (Cereda et al., 2020; Graselli et al., 2020). While the eight update report from the ECDC (ECDC 2020a) restates this but suggests based on data from 16 EU countries that respiratory and or ICU support is needed in 2.4 % of cases; the latest ECDC report (ninth Update; ECDC 2020b) revises this slightly country specific median 2 % (IQR 0 to 4 %). Studies conducted in the USA too report high rates of hospitalisation (CDC COVID-19 Response Team, 2020), high proportion of patients admitted to ICU care and very high mortality rates (Argenziano et al, 2020; Cummings et al., 2020; Lewnard et al., 2020; Myers et al., 2020; Paranjpe et al., 2020). The cause of the differences in disease presentation between countries is not clear. Perhaps differences in case definition, the relative age of the population, the level of pre-existing conditions within the

population, and other health factors may be contributing to these differences. Given the experience in Italy, thus far, suggests that must carefully manage mitigation measures to ensure ICU capacity is not reached or breached. However, another major influencer on hospitalisation rate will be the definition of a suspect case and the extent of COVID-19 testing within the community; the detection of a greater number of milder cases, diagnosed within the community will ultimately influence the hospitalisation rate. The influence of community testing is becoming evident in Ireland; as April progresses, it is clear in each subsequent HPSC report (2020a; 2020b; 2020c; 2020d) that the rate of hospitalisation and proportion of patients admitted to ICU is reducing. This is evidence perhaps that a broader case suspect definition and a wider testing approach will impact the overall rate of hospitalisation and admission to ICU.

## **4.2 LENGTH OF STAY (LOS)**

### *4.2.1 Length of stay in hospital (Non-ICU)*

The overall length of hospital stay varied between 4 and 25 days among studies; two of these studies were case series based on the observations of 10 (Lo et al., 2020) or 12 (Kujawski et al., 2020) patients, a further article (Linton et al., 2020) was based on data extracted from publically available datasets. The studies are very diverse in their reporting and presentation of hospital length data. The largest study is an Italian report (Istituto Superiore di Sanità, 2020) reporting the median hospital stay of 5 days for cases that did not require ICU level of care. However, no range or confidence interval is described by this report. Similar to the shorter duration of hospital stay in Italy, a more recent study conducted in the USA, which examined hospital records of 5,700 sequential admissions to New York hospitals, reported a short length of stay, median 4.1 days (IQR 2.3 to 6.8). The hospital length of stay varies dramatically among different studies. Perhaps differences in hospital capacity, overcrowding, government policy, funding source and other factors might

influence length of stay. Of interest Richardson et al. (2020) indicates 45 patients were re-admitted to hospital for further care, indicating perhaps the pressure on bed availability. Argenziano et al. (2020) outlines the critical situation faced in some Emergency Departments in New York and describes the death of 14.7 % of ED only patients; patients who died in the emergency room prior to being admitted to hospital. Given the large variation in length of stay and the difference between continents; the studies relating to hospital LOS outside an ICU setting were not appropriate to use to calculate a central tendency.

#### *4.2.2 Length of stay in hospital (ICU)*

Studies from China (Cao et al., 2020; Fan et al., 2020; Yang et al., 2020; Zhou et al., 2020) report median ICU stays of 7 to 10 days. Similar median lengths of stay have been reported in Italy. The Italian report (COVID-19 Surveillance Group, 2020) dated 29<sup>th</sup> April 2020 describes median LOS of 8 days if admitted to an ICU setting (n = 25,452); however, actual length of time in ICU and proportion or number of patients cared for in ICU were not specified. Important too, to note, this report while including a large number of cases, only includes those who have died, and hence will not reflect the possible longer stay of survivors. Another Italian study conducted by Grasselli et al. (2020b) reports the median length of ICU stay was 9 days (IQR 6 to 13 days) for 1,581 patients. A Swiss study, too, outlined the median length of stay was 9 days for 41 patients followed to discharge (Ceruti et al., 2020). It is noticeable that length of ICU stay is more variable in US studies. In particular studies that breakdown length of stay into those completed stay compared to patients continuing care. It is evident that care must be taken with interpretation, continuing care groups are reported to have longer stays; median LOS of 11.4 (Petrilli et al., 2020); 14 (Bhatraju et al., 2020); and 23 days (Argenziano et al., 2020) are outlined. A smaller case series conducted by Valente-Acosta in Mexico highlights this continuing care group; this study describes a case series of 33 patients admitted to ICU in Mexico city, the median LOS

of 23 days is indicative that LOS in ICU can be significant; although their continuing care group is only n = 4. The authors of the UK ICNARC (2020a) report clearly highlight the influence of bias towards shorter stay; with both survivor and non-survivor groups reported to have a median LOS of 8 days (ICNARC, 2020a). Indeed earlier reports from INCARC (2020b) reported shorter LOS of ICU patients, as fewer persons had progressed through to completion of treatment. It is evident that study cutoff, and short follow ups, have influenced reported ICU LOS; it is clear that the influence of continuing care groups will lengthen length of ICU stay somewhat in time.

#### *4.2.4 Length of hospital stay prior to transfer to ICU*

A long hospital stay (median 8 days, IQR 4 to 11 days) was reported by Fan et al., (2020) prior to transfer to ICU, some of whom were diagnosed based on clinical findings. Given the timing of the study so early in the outbreak and the lack of consistency regarding the diagnosis, these data should be discounted when considering future resources. Only the UK ICNARC report (2020a) details useful data pertaining to length of hospital in Europe. Median length of hospital stay pre admission to ICU for laboratory confirmed COVID-19 patients (n = 8,233) was 1 day (IQR 0 to 3 days), indicating the short duration before stepped up care need is identified in COVID-19 patients.

Length of stay post ICU is illustrated in a figure in some small case series; and as such, were data were not extracted for reporting or discussion in this review.

## **5. STUDY LIMITATIONS**

Limitations associated with any rapid review are pertinent to this study. A narrow aim was set, namely to determine rate of hospitalisation and the length of stay in hospital due to COVID-19 infection in countries across the world now at the centre of the pandemic. The



sources of the literature may be limited by the time-limited constraint of gathering relevant literature (less than five weeks). However, this rapid approach was necessary, given the aim was to provide evidence-based estimates of length of hospital stay to steer policy and provide parameter estimates for utilisation within a hospital resource model. Inclusion of articles in this review was assessed based on the subject being reported in the article and if the numbers of cases were considered relevant. Another shortcoming was some of the available literature is in pre-print form and only undergoing peer review.

## 6. CONCLUSIONS

Differences in the severity of case presentations have been described between continents; and Ireland should base its expectation on those cases observed in Europe thus far in the pandemic. Advice from the ECDC suggests hospitalisation rates of up to 42 % can be expected. Additionally, we must expect increased level of care requirements, to critical care and ICU levels, in up to 3 % of cases to allow for spare capacity, as mitigation measures are relaxed in our jurisdiction. There is no doubt that the case definition in use and the availability of community testing will determine the hospitalisation rate within a country. In countries where community testing has been significant, we can expect the rate of hospitalisation and the proportion requiring ICU level care to be lower. Preliminary data in Ireland certainly supports this assertion.

The length of stay in hospital outside of the ICU setting, due to COVID-19 is highly variable in the literature, with median estimates varying from 4 to 25 days. Studies diverged in their inclusion criterion. It is likely that the aim of hospitalisation varied among countries. Discharge criteria is divergent in different jurisdictions, whether it related to a patient required to test negative prior to discharge or where there was pressure to free up

overcrowded hospitals. Indeed it is likely that some countries used hospitalisation to ensure quarantine.

As the pandemic spreads rapidly throughout the world, more and more evidence regarding the length of stay in ICU following COVID-19 is reported. Many of these reports indicate a median ICU length of stay between 7 to 10 days; however a number of these studies report length of stay based only on resolved cases, and as such duration of stay it is likely skewed towards a short stay due to bias towards those who have completed their ICU stay and are now discharged or have died. Thus the upper estimates of the range should be considered for use in resource models. It is apparent too that the data generated by each individual country during the initial months of the outbreak will be critical to estimate the parameters used for any national resource model.

*Word count 4400*

## **7. CONFLICT OF INTEREST STATEMENT**

The authors do not have a financial or personal relationship with other people or organisations that could inappropriately influence or bias the content of the paper.

## **8. FUNDING**

All authors were employed through their home institutions. No additional funding was used.

## **9. REFERENCES**

466 Argenziano MG, Bruce SL, Slater CL, Tiao JR, Baldwin MR Barr RG, Chang BP, Chau KH, Choi  
467 JJ, Gavin N, Goyal P, Mills AM, Patel AA, Romney M-LS, Safford MM, Kuiper JJ, Schluger  
468 NW, Sengupta S, Sobieszczyk ME, Zucker JE, Asadourian PA, Bell FM, Boyd R, Cohen MF,  
469 MacAlistair I, Colville LA, de Jonge JA, Dershowitz LB, Dey SA, Eiseman KA, Girvin ZP,  
470 Goni DT, Harb AA, Herzik N, Householder S, Karaaslan LE, Lee H, Lieberman E, Ling A, Lu  
471 R, Shou AY, Sisti AC, Snow ZE, Sperring CP, Xiong Y, Zhou HW, Natarajan K Hripcsak G,  
472 Chen R. 2020. Characterization and clinical course of 1000 patients with COVID-19 in  
473 New York: retrospective case series. MedRxiv preprint.  
474 **doi:** <https://doi.org/10.1101/2020.04.20.20072116>

475 Badawi O, Liu X, Berman I, Amelung PJ, Doerfler M, Chandra S. 2020. Impact of COVID-19  
476 pandemic on severity of illness and resources required during intensive care in the greater New  
477 York City area. **doi:** <https://doi.org/10.1101/2020.04.08.20058180>. PrePrint

478 Barrasa H, Rello J, Tejada S, Martin A, Balzikueta G, Vinuesa C, Fernandez Miret B, Villagra A,  
479 San Sebastian A, Cabenes S, Iribarren S, Fonseca F, Maynar J, and the Alana COVID19  
480 Study Investigators. 2020. SARS-Cov-2 in Spanish Intensive Care: Early Experience with  
481 15-day Survival In Vitoria. Anaes Crit Care Pain Med. ePUB ahead of print. doi:  
482 10.1016/j.accpm.2020.04.001

483 Bhatraju PK, Ghassemieh BJ, Nickols M, Kim R, Jerome KR, Nalla AK, Greninger AL, Pipavath  
484 S, Wurfel MM, Evans L, Kritek PA, West TE, Luk A, Gerbino A, Dale CR, Goldman JD,  
485 O'Mahony S, Mikacenic C. 2020. Covid-19 in Critically Ill Patients in the Seattle Region —  
486 Case Series. NEJM DOI: 10.1056/NEJMoa2004500

487 Bi et al., Epidemiology and Transmission of COVID-19 in Shenzhen China: Analysis of 391  
488 cases and 1,286 of their close contacts. <https://doi.org/10.1101/2020.03.03.20028423>

489 Borobia AM, Carcas AJ, Arnalich F, Alvarez-Sale R, Montserrat J, Quintana M, Figueira JC,  
490 Santos Olmo RMT, Garcia-Rodriguez J, Martin-Vega A, Ramirez E, Buno A, Martinez-Ales  
491 G, Garcia-Arenzana, Lopez CN, de Garcia MM, Moreno F, Reinisco-Barbero F, Martin-

492 Quiros A, River A, Mingorance J, Carpio CC, Arribas DP, Cuevas ER, Prados MC, Rios JJ,  
 493 Herman J, Arribas JR, COVID@HULP working team. 2020. A cohort of patients with  
 494 COVID-19 in a major teaching hospital in Europe.  
 495 **doi:** <https://doi.org/10.1101/2020.04.29.20080853>

496 Buerhaus PI, Auerbach DI, Staiger DO. Older Clinicians and the Surge in Novel Coronavirus  
 497 Disease 2019 (COVID-19). *JAMA*. Published online March 30, 2020.  
 498 **doi:**[10.1001/jama.2020.4978](https://doi.org/10.1001/jama.2020.4978).

499 Cao B, Wang Y, Wen D, Liu W, Wang J, Fan G, Ruan L, Song B, Cai Y, Wei M, Li X, Xia J, Chen  
 500 N, Xiang J, Yu T, Bai T, Xie X, Zhang L, Li C, Yuan Y, Chen H, Li H, Huang H, Tu S, Gong F,  
 501 Liu Y, Wei Y, Dong C, Zhou F, Gu X, Xu J, Liu Z, Zhang Y, Li H, Shang L, Wang K, Li K, Zhou  
 502 X, Dong X, Qu Z, Lu S, Hu X, Ruan S, Luo S, Wu J, Peng L, Cheng F, Pan L, Zou J, Jia C,  
 503 Wang J, Liu X, Wang S, Wu X, Ge Q, He J, Zhan H, Qiu F, Guo L, Huang C, Jaki T, Hayden  
 504 FG, Horby PW, Zhang D, Wang C. 2020. A Trial of Lopinavir-Ritonavir in Adults  
 505 Hospitalized with Severe Covid-19. *The New England Journal of Medicine*.  
 506 **doi:**[10.1056/NEJMoa2001282](https://doi.org/10.1056/NEJMoa2001282).

507 CDC COVID-19 Response Team 2020. Severe Outcomes among patients with Coronavirus  
 508 2019 (COVID-19)- United States, Feb 12 to March 16, 2020. *MMWR Morb Mortal Wkly*  
 509 *Rep* 69, 343-346.

510 Cecconi M, Pesenti A, of the COVID-19 Lombardy ICU Network 2020b. Baseline  
 511 Characteristics and Outcomes of 1591 Patients Infected With SARS-CoV-2 Admitted to  
 512 ICUs of the Lombardy Region, Italy *JAMA* **doi:**[10.1001/jama.2020.5394](https://doi.org/10.1001/jama.2020.5394).

513 Chan JF-W, Yuan S Kok K-H, To K, Chu H, Yang J, Xing F, Liu J, Yip CC-Y, Poon R, Tsoi H-W, Lo  
 514 SK-F Chan K-H, Poon VK-M, Chan W-M, Ip JD, Cai J-P, Cheng CC-C, Hui CK-M, Yuen K-Y. A  
 515 familial cluster of pneumonia associated with the 2019 novel coronavirus indicating  
 516 person-to-person transmission: a study of a family cluster *Lancet* 395: 514-523.

- Chen N, Zhou M, Dong X, Ou J, Gong Y, Han Y, Qiu Y, Wang J, Liu Y, Wei Y, Z J Yu T, Chang X, Zhang L. Epidemiological and clinical characteristics of 99 cases of 2019 novel coronavirus pneumonia in Wuhan, China: a descriptive study. *Lancet*. 2020;395:507–13.
- Cereda D, Tirani M, Rovida F, Demicheli V, Ajelli M, Poletti P, Trentini F, Guzzetta G, Marziano V, Barone A, Magoni M, Deandrea S, Diurno G, Lombardo M, Faccini M, Pan A, Bruno R, Pariani E, Grasselli G, Piatti A, Gramegna M, Baldanti F, Melegaro A, Merler S. 2020. The early phase of the COVID-19 outbreak in Lombardy, Italy PrePrint
- COVID-19 Surveillance Group (2020). Istituto Superiore di Sanità. Sorveglianza Integrata. Characteristics of SARS-CoV-2 patients dying in Italy. Report based on available data on April 13th, 2020. Accessed 15APR2020.
- [https://www.epicentro.iss.it/en/coronavirus/bollettino/Report-COVID-2019\\_13\\_April\\_2020.pdf](https://www.epicentro.iss.it/en/coronavirus/bollettino/Report-COVID-2019_13_April_2020.pdf)
- Cummings MJ, Baldwin MR, Abrams D, Jacobson SD, Claasen J, Rabbani LE, Hastie J, Hochman BR, Salazar-Schicchi J, Yip NH, Brodie D, O'Donnell MR. Epidemiology, clinical course, and outcomes of critically ill adults with COVID-19 in New York City: a prospective cohort study
- doi:** <https://doi.org/10.1101/2020.04.15.20067157> PrePrint
- D'Adamo H, Yoshikawa T, Ouslander JG. Coronavirus Disease 2019 in Geriatrics and Long-term Care: The ABCDs of COVID-19 *J Am Geriatr Soc*. 2020 Mar 25. doi: 10.1111/jgs.16445. [Epub ahead of print]
- European Centre for Disease Prevention and Control 2020a. Coronavirus disease 2019 (COVID-19) pandemic: increased transmission in the EU/EEA and the UK – eighth update, 8th April 2020. Stockholm. Accessed at: <https://www.ecdc.europa.eu/sites/default/files/documents/covid-19-rapid-risk-assessment-coronavirus-disease-2019-eighth-update-8-april-2020.pdf>
- European Centre for Disease Prevention and Control 2020b. Coronavirus disease 2019 (COVID-19) pandemic: increased transmission in the EU/EEA and the UK – ninth update,

543 23rd April 2020. Stockholm. Accessed at:  
544 <https://www.ecdc.europa.eu/sites/default/files/documents/covid-19-rapid-risk->  
545 [assessment-coronavirus-disease-2019-ninth-update-23-april-2020.pdf](https://www.ecdc.europa.eu/sites/default/files/documents/covid-19-rapid-risk-assessment-coronavirus-disease-2019-ninth-update-23-april-2020.pdf)  
546 Fan H, Zhang L, Huang B, Zhu M, Zhou Y, Zhang H, Tao X, Cheng S, Yu W, Zhu L, Chen J. 2020  
547 Retrospective Analysis of Clinical Features in 101 Death Cases with COVID-19, MedRxiv  
548 PrePrint <https://doi.org/10.1101/2020.03.09.20033068>  
549 Garg S, Kim L, Whitaker M, O'Halloran A, Cummings C, Holstein R, Prill M, Chai SJ, Kirley PD,  
550 Alden NB, Kawasaki B, Yousey-Hindes K, Niccolai L, Anderson EJ, Openo KP, Weigel A,  
551 Monroe ML, Ryan P, Henerson J, Kim S, Como-Sabetti K, Lynfield R, Sosin D, Rores S,  
552 Muse A, Bennett NM, Billing L, Sutton M, West N, Schaffner W, Talbot HK, Aquino C,  
553 George A, Budd A, Brammer L, Lagley G, Hall AJ, Fry A. 2020. Hospitalization Rates and  
554 Characteristics of Patients Hospitalized with Laboratory-Confirmed Coronavirus Disease  
555 2019 — COVID-NET, 14 States, March 1–30, 2020. Morbidity and Mortality Weekly  
556 Report 69.  
557 Guan WJ, Ni ZY, Hu Y, et al; China Medical Treatment Expert Group for Covid-19. Clinical  
558 characteristics of coronavirus disease 2019 in China. *N Engl J Med*.  
559 doi:10.1056/NEJMoa2002032 – Original research  
560 Grasselli G, Presenti A, Cecconi M. 2020a Critical care Utilization for the COVID 19 outbreak  
561 in Lombardy Italy. JAMA Opinion. Accessed at: <https://jamanetwork.com/> by a NUS  
562 Libraries User on 03/16/2020  
563 Grasselli G, Zangrillo A, Zanella A, Antonelli M, Cabrini Luca, Castelli A, Cereda D, Coluccello  
564 A, Foti G, Fumagalli R, Iotti G, Latronico N, Lorini L, Merler S, Natalini G, Piatti A, Ranieri  
565 MV, Scandroglio AM, Storti E, Cecconi M, Pesenti A, COVID-19 ICU Network. 2020.  
566 Baseline Characteristics and Outcomes of 1591 Patients Infected With SARS-CoV-2  
567 Admitted to ICUs of the Lombardy Region, Italy JAMA. Published online April 6, 2020b.  
568 doi:10.1001/jama.2020.5394

HPSC Epi Team. 2020. Daily Epidemiology Reports compiled by the PSC are available at:

<https://www.hpsc.ie/a->

[z/respiratory/coronavirus/novelcoronavirus/casesinireland/epidemiologyofcovid-](https://www.hpsc.ie/a-z/respiratory/coronavirus/novelcoronavirus/casesinireland/epidemiologyofcovid-19inireland/)

[19inireland/](https://www.hpsc.ie/a-z/respiratory/coronavirus/novelcoronavirus/casesinireland/epidemiologyofcovid-19inireland/)

HPSC. 2020a. Epidemiology of COVID-19 in Ireland. 1<sup>st</sup> April 2020. Accessed at:

<https://www.hpsc.ie/a->

[z/respiratory/coronavirus/novelcoronavirus/casesinireland/COVID-](https://www.hpsc.ie/a-z/respiratory/coronavirus/novelcoronavirus/casesinireland/COVID-19%20Epidemiology%20report%20for%20NPHE%2001.04.2020%20_website.pdf)

[19%20Epidemiology%20report%20for%20NPHE%2001.04.2020%20\\_website.pdf](https://www.hpsc.ie/a-z/respiratory/coronavirus/novelcoronavirus/casesinireland/COVID-19%20Epidemiology%20report%20for%20NPHE%2001.04.2020%20_website.pdf) on

05APR2020.

HPSC. 2020b. Epidemiology of COVID-19 in Ireland. 15<sup>th</sup> April 2020. Accessed at:

<https://www.hpsc.ie/a->

[z/respiratory/coronavirus/novelcoronavirus/casesinireland/COVID-](https://www.hpsc.ie/a-z/respiratory/coronavirus/novelcoronavirus/casesinireland/COVID-19%20Epidemiology%20report%20for%20NPHE%2015.04.2020%20_website.pdf)

[19%20Epidemiology%20report%20for%20NPHE%2015.04.2020%20\\_website.pdf](https://www.hpsc.ie/a-z/respiratory/coronavirus/novelcoronavirus/casesinireland/COVID-19%20Epidemiology%20report%20for%20NPHE%2015.04.2020%20_website.pdf) on

17APR2020.

HPSC. 2020c. Epidemiology of COVID-19 in Ireland. 29<sup>th</sup> April 2020. Accessed at:

<https://www.hpsc.ie/a->

[z/respiratory/coronavirus/novelcoronavirus/casesinireland/COVID-](https://www.hpsc.ie/a-z/respiratory/coronavirus/novelcoronavirus/casesinireland/COVID-19%20Epidemiology%20report%20for%20NPHE%2029.04.2020%20_website.pdf)

[19%20Epidemiology%20report%20for%20NPHE%2029.04.2020%20\\_website.pdf](https://www.hpsc.ie/a-z/respiratory/coronavirus/novelcoronavirus/casesinireland/COVID-19%20Epidemiology%20report%20for%20NPHE%2029.04.2020%20_website.pdf) on

01MAY2020.

HPSC. 2020d. Epidemiology of COVID-19 in Ireland. 6<sup>th</sup> May 2020. Accessed at:

<https://www.hpsc.ie/a->

[z/respiratory/coronavirus/novelcoronavirus/casesinireland/COVID-](https://www.hpsc.ie/a-z/respiratory/coronavirus/novelcoronavirus/casesinireland/COVID-19%20Epidemiology%20report%20for%20NPHE%2006.05.2020%20v1%20website.pdf)

[19%20Epidemiology%20report%20for%20NPHE%2006.05.2020%20v1%20website.pdf](https://www.hpsc.ie/a-z/respiratory/coronavirus/novelcoronavirus/casesinireland/COVID-19%20Epidemiology%20report%20for%20NPHE%2006.05.2020%20v1%20website.pdf)

on 08MAY2020.

Huang C, Wang Y, Li X, Ren L, Zhao J, Hu Y, Zhang L, Fan G, Xu J, Gu X, Cheng Z, Yu T, Xia Y,

Wu W, Xie X, Yin X, Li W, X Y, Gao H, Guo H, Xie J, Wang G, Jiang R, Gao Z, Wang J, Cao B.

595 2020. Clinical features of patients infected with 2019 novel coronavirus in Wuhan,  
596 China. Lancet. 395: 497–506.

597 Hu Z, Song C, Xu C, Jin G, Chen Y, Xu X, Ma H, Chen W, Lin Y, Zheng Y, Wang J, Hu Z, Yi Y,  
598 Hongbing S. 2020. Clinical characteristics of 24 asymptomatic infections with COVID- 19  
599 screened among close contacts in Nanjing, China, Sci China Life Sci 63.

600 Intensive Care National Audit & Research Centre (ICNARC), 2020a. Report on COVID-19 in  
601 critical care 08 May 2020. Assessed at:  
602 [https://www.icnarc.org/DataServices/Attachments/Download/b8c18e7d-e791-ea11-](https://www.icnarc.org/DataServices/Attachments/Download/b8c18e7d-e791-ea11-9125-00505601089b)  
603 [9125-00505601089b](https://www.icnarc.org/DataServices/Attachments/Download/b8c18e7d-e791-ea11-9125-00505601089b) on 08MAY2020

604 Intensive Care National Audit & Research Centre (ICNARC), 2020b. Report on COVID-19 in  
605 critical care 01 May 2020. Assessed at:  
606 [https://www.icnarc.org/DataServices/Attachments/Download/f48efee2-d38b-ea11-](https://www.icnarc.org/DataServices/Attachments/Download/f48efee2-d38b-ea11-9125-00505601089b)  
607 [9125-00505601089b](https://www.icnarc.org/DataServices/Attachments/Download/f48efee2-d38b-ea11-9125-00505601089b) on 02MAY2020

608 Istituto Superiore di Sanità. Sorveglianza Integrata COVID-19 in Italia: AGGIORNAMENTO 22  
609 marzo 2020 2020. Accessed at:  
610 [https://www.epicentro.iss.it/en/coronavirus/bollettino/Infografica\\_13aprile%20ENG.pdf](https://www.epicentro.iss.it/en/coronavirus/bollettino/Infografica_13aprile%20ENG.pdf)  
611 [f](https://www.epicentro.iss.it/en/coronavirus/bollettino/Infografica_13aprile%20ENG.pdf) on 14APR2020

612 Istituto Superiore di Sanità. Sorveglianza Integrata Characteristics of SARS-CoV-2 patients  
613 dying in Italy Report based on available data on April 16th, 2020. Accessed 15APR2020.

614 Istituto Superiore di Sanità. Sorveglianza Integrata Characteristics of SARS-CoV-2 patients  
615 dying in Italy Report based on available data on April 29th, 2020. Accessed  
616 15APR2020[https://www.epicentro.iss.it/en/coronavirus/bollettino/Report-COVID-](https://www.epicentro.iss.it/en/coronavirus/bollettino/Report-COVID-2019_29_april_2020.pdf)  
617 [2019\\_29\\_april\\_2020.pdf](https://www.epicentro.iss.it/en/coronavirus/bollettino/Report-COVID-2019_29_april_2020.pdf)

618 Ki et al., 2020 Epidemiologic characteristics of early cases with 2019 novel coronavirus  
619 (2019-nCoV) disease in Korea Epi & Health 42, Article ID: e2020007, 18 pages  
620 <https://doi.org/10.4178/epih.e2020007>



621 Korean Society of Infectious Diseases, et al., 2020 Report on the Epidemiological Features of  
622 Coronavirus Disease 2019 (COVID-19) Outbreak in the Republic of Korea from January  
623 19 to March 2, 2020 J Korean Med Sci. 2020 Mar 16;35(10):e112. doi:  
624 10.3346/jkms.2020.35.e112

625 Kujawski SA, Wong KK, Collins JP, Epstein L, Killerby ME, Midgley CM, et al. First 12 patients  
626 with coronavirus disease 2019 (COVID-19) in the United States. medRxiv.  
627 2020:2020.03.09.20032896

628 Lewnard, JA, Liu VX, Jackson ML, Schmidt MA, Jewell BL, Flores JP, Jentz C, Northrup GR,  
629 Mahmud A,. Reingold AL, Petersen M, Jewell NP, Young S, Bellows J. 2020. Incidence,  
630 clinical outcomes, and transmission dynamics of hospitalized 2019 coronavirus disease  
631 among 9,596,321 individuals residing in California and Washington, United States: a  
632 prospective cohort study DOI: : <https://doi.org/10.1101/2020.04.12.20062943>

633 Linton et al., Incubation Period and Other Epidemiological Characteristics of 2019 Novel  
634 Coronavirus Infections with Right Truncation: A Statistical Analysis of Publicly Available  
635 Case Data. Journ Clin Med. <https://doi.org/10.3390/jcm9020538>

636 Liu X, Zhou H, Zhou Y, Wu X, Zhao Y, Lu Y, Tan W, Yuan M, Ding X, Zou J, Li R, Liu H, Ewing  
637 RM, Hu Y, Nie H, Wang Y. 2020. Risk Factors Associated with Disease Severity and  
638 Length of Hospital Stay in COVID-19 Patients. J Infect  
639 <https://di.org/10.1016/j.jinf.2020.04.008>

640 Lo et al., 2020 Evaluation of SARS-CoV-2 RNA shedding in clinical specimens and clinical  
641 characteristics of 10 patients with COVID-19 in Macau. Int J Bio Sci 16, 1698 – 1707

642 McMichael T, Currie DW, Clark S, Pogosjans S, Kay M, Schwartz NG, Lewis J, Baer A Lukoff  
643 MD, Ferro J, Brostrom-Smith C Rea TD, Sayre MR, Riedo FX, Russell D, Hiatt B,  
644 Montgomery P, Rao AK Chow EJ, Tobolowsky F, Hughes MJ, Bardossy AC, Oakley LP,  
645 Jacobs JR, Stone ND, Reddy SC, Jerigan JA, Honein MA, Clark TA, Duchin JS. and the CDC

Investigation Team. 2020. Epidemiology of Covid-19 in a Long-Term Care Facility in King  
County, Washington. New Engl J Med DOI: 10.1056/NEJMoa2005412

Myers LC, Parodi SM, Escobar GJ Liu V. 2020 Characteristics of Hospitalized Adults With  
COVID-19 in an Integrated Health Care System in California JAMA Res Lett  
doi:10.1001/jama.2020.7202

Onder G, Rezza G, Brusaferro A, Case-Fatality Rate and Characteristics of Patients Dying in  
Relation to COVID-19 in Italy. JAMA. doi:10.1001/jama.2020.4683. Opinion.

Paranjpe I, RussakAJ, De Freitas JK, Lala A, Miotto R, Vaid A, Johnson KW, Danieleto M,  
Golden E, Meyer D, Singh M, Somani M, Manna M, Nangia U, Kapoor A, O'Hagan R,  
O'Reilly PF, Huckins LM, Glowe P, Kia A, Timsina P, Freeman RM, Levin MA, Jhang J,  
Firpo A, Kovatch P, Finkelstein J, Aberg JA, Bagiella E, Horowitz CR, Murphy B, Fayad ZA,  
Narula J, Nestler EJ, Fuster V, CordonCardo C, Charney DS, Reich DL, Just AC, Bottinger  
EP, Charney AW, Glicksberg BS, Nadkarni GN, and on behalf of Mount Sinai Covid  
Informatics Centre. Clinical characteristics of hospitalized Covid-19 patients in New York  
City. MedRxiv Preprint. doi: <https://doi.org/10.1101/2020.04.19.20062117>

Qian Z, Alaa AM, van der Schaar M, Ercole A 2020 Between-centre differences for COVID-19  
ICU mortality from early data in England. MedRxiv doi:  
<https://doi.org/10.1101/2020.04.19.20070722>.

Qiu H, Wu J, Hong L, Luo Y, Song Q, Chen D. 200 Clinical and epidemiological features of 36  
children with coronavirus disease 2019 (COVID-19) in Zhejiang, China: an observational  
cohort study Lancet Inf Dis DOI: 10.1016/S1473-3099(20)30198-5.

Remuzzi and Remuzzi Covid\_19 and Italy: What's next? The Lancet  
DOI:[https://doi.org/10.1016/S0140-6736\(20\)30627-9](https://doi.org/10.1016/S0140-6736(20)30627-9).

Rhodes A, Ferdinande P, Flaatten H, Guidet B, Metnitz PG, Moreno RP. The variability of  
critical care bed numbers in Europe. Intensive Care Med. 2012;38(10):1647-53.

- 671 <https://doi.org/10.1007/s00134-012-2627-8> PMID: 22777516.
- 672 Richardson S, Hirsch JS, Narasimhan M, Crawford JM, McGinn T, Davidson KW, and the  
673 Northern COVID-19 Research Group. 2020. Presenting Characteristics, Comorbidities,  
674 and Outcomes Among 5700 Patients Hospitalized With COVID-19 in the New York City  
675 Area. *JAMA*. Published online April 22, 2020. doi:10.1001/jama.2020.6775.
- 676 Russell, T.W., Hellewell, J., Jarvis, C.I., van Zandvoort, K., Abbott, S., Ratnayake, R., Flasche,  
677 S., Eggo, R.M., Edmunds, W.J., Kucharski, A.J. and CMMID COVID-19 working group,  
678 2020. Estimating the infection and case fatality ratio for coronavirus disease (COVID-19)  
679 using age-adjusted data from the outbreak on the Diamond Princess cruise ship,  
680 February 2020. *Eurosurveillance*, 25(12).
- 681 Spiteri Gianfranco, Fielding James, Diercke Michaela, Campese Christine, Enouf  
682 Vincent, Gaymard Alexandre, Bella Antonino, Sognamiglio Paola, Sierra Moros  
683 Maria José, Riutort Antonio Nicolau, Demina Yulia V., Mahieu Romain, Broas  
684 Markku, Bengnér Malin, Buda Silke, Schilling Julia, Filleul Laurent, Lepoutre  
685 Agnès, Saura Christine, Mailles Alexandra, Levy-Bruhl Daniel, Coignard Bruno, Bernard-  
686 Stoecklin Sibylle, Behillil Sylvie, van der Werf Sylvie, Valette Martine, Lina  
687 Bruno, Riccardo Flavia, Nicastrì Emanuele, Casas Inmaculada, Larrauri Amparo, Salom  
688 Castell Magdalena, Pozo Francisco, Maksyutov Rinat A., Martin Charlotte, Van Ranst  
689 Marc, Bossuyt Nathalie, Siira Lotta, Sane Jussi, Tegmark-Wisell Karin, Palmérus  
690 Maria, Broberg Eeva K., Beauté Julien, Jorgensen Pernille, Bundle Nick, Pereyaslov  
691 Dmitriy, Adlhoch Cornelia, Pukkila Jukka, Pebody Richard, Olsen Sonja, Ciancio Bruno  
692 Christian. First cases of coronavirus disease 2019 (COVID-19) in the WHO European  
693 Region, 24 January to 21 February 2020. *Euro Surveill*. 2020; 25 (9): pii=2000178.  
694 <https://doi.org/10.2807/1560-7917.ES.2020.25.9.2000178>
- 695 Stier A, Marc G, Berman LM, Bettencourt A. 2020 COVID-19 attack rate increases with city  
696 size. *MedRxiv preprint*. <https://doi.org/10.1101/2020.03.22.20041004>

- Stoecklin et al., 2020 First cases of coronavirus disease 2019 (COVID-19) in France: surveillance, investigations and control measures, January 2020. Euro Surv 2020;25(6):pii=2000094
- Tao Y, Cheng P, Chen W, Wan P, Chen Y, Yuan G, Chen J, Huo D, Guan G, Sun D, Tan J, Yang G, Zeng W, Zhu C. 2020 High incidence of asymptomatic SARS-CoV-2 infection, Chongqing, China BMJ Yale Available on MedRxiv <https://doi.org/10.1101/2020.03.16.20037259>.
- Tian S, Hu N, Lou J, Chen K, Kang X, Xiang Z, Chen H, Wang D, Liu N, Liu D, Chen G, Zhang Y, Li D, Li J, Lian H, Niu S, Zhang L, Zhang J. 2020 Characteristics of COVID-19 infection in Beijing J Inf 80, 401-406 <https://doi.org/10.1016/j.jinf.2020.02.018>
- Tricco AC, Erin Lillie E, Zarin W, O'Brien KK, Colquhoun H, Levac D, Moher D, Peters MDJ, Horsley T, Weeks L, Hempel S, Akl EA, Chang C, McGowan J, Stewart L, Hartling L, Aldcroft A, Wilson MG, Garritty G, Lewin S, Godfrey CM, Macdonald MT, Langlois EV, Soares-Weiser K, Moriarty J, Clifford T, Tunçalp Ö, Straus SE, 2020. PRISMA extension for scoping reviews (PRISMA-ScR): checklist and explanation. Ann Intern Med 169: 467 – 473.
- Valente-Acosta B, Hoyo-Ulloa I, Espinosa-Aguilar L, Mendoza-Aguilar R, Garcia-Guerrero J, Ontañón-Zurita D, Gomez-Gomez B, Fueyo-Rodríguez O, Vera-Zertuche JM, Anzola-Arias RJ, Jiménez-Ceja JV, Horta-Carpinteyro D, OlveraGuzman C3,5, Aguirre-Sanchez J5, Franco-Granillo J, Jauregui-Camargo L, SadaDíaz E, Saavedra-Perez-Salas R, Palomar-Lever A, Moreno-Sánchez F 2020 COVID-19 severe pneumonia in Mexico City – First experience in a Mexican hospital MedRxiv Preprint. doi: <https://doi.org/10.1101/2020.04.26.20080796>
- Verity et al.,2020 Estimates of the severity of coronavirus disease 2019: a model-based analysis Lancet Inf Dz 2020. Published Online March 30, 2020. [https://doi.org/10.1016/S1473-3099\(20\)30243-7](https://doi.org/10.1016/S1473-3099(20)30243-7)

- Wang D, Hu B, Hu C, et al. Clinical characteristics of 138 hospitalized patients with 2019 novel coronavirus infected pneumonia in Wuhan, China. *JAMA*. 2020. <https://doi.org/10.1001/jama.2020.1585>.
- Wen et al., 2020 Epidemiological and clinical characteristics of COVID-19 in Shenzhen, the largest migrant city of China <https://doi.org/10.1101/2020.03.22.20035246>
- World Health Organization (WHO). 2020. Report of the WHO-China Joint Mission on Coronavirus Disease 2019 (COVID-19) 2020 [cited 2020 1 March]. Available from: <https://www.who.int/docs/defaultsource/coronaviruse/who-china-joint-mission-on-covid-19-final-report.pdf>.
- World Health Organization (WHO). Rapid reviews to strengthen health policy and systems: A practical guide. 2017. Eds Andrea C. Tricco, Etienne V Langlois and Sharon E Straus. Published by the World Health Organization (WHO).
- Wu JT, Leung K, Bushman, M, Kishore N, Niehus R, de Salazar PM, Cowling BJ, Lipsitch M, Leung GM. 2020. Estimating clinical severity of COVID-19 from the transmission dynamics in Wuhan, China. *Nature Medicine* 26; 506 – 510.
- Wu Z, McGoogan JM. Characteristics of and Important Lessons From the Coronavirus Disease 2019 (COVID-19) Outbreak in China: Summary of a Report of 72 314 Cases From the Chinese Center for Disease Control and Prevention. *JAMA*. Published online February 24, 2020. doi:10.1001/jama.2020.2648 5.
- Xu XW, Wu XX, Jiang XG, et al. Clinical findings in a group of patients infected with the 2019 novel coronavirus (SARS-Cov-2) outside of Wuhan, China: retrospective case series. *BMJ*. 2020;368: m606.
- Yang X, Yu Y, Xu J et al (2020) Clinical course and outcomes of critically ill patients with SARS-CoV-2 pneumonia in Wuhan, China: a single-centered, retrospective, observational study. *Lancet Respir Med*. [https://doi.org/10.1016/S2213-2600\(20\)30079-5](https://doi.org/10.1016/S2213-2600(20)30079-5)

748 Yuan et al, The correlation between viral clearance and biochemical outcomes of 94  
749 COVID-19 infected discharged patients. *Inflammation Research*.  
750 <https://doi.org/10.1007/s00011-020-01342-0>.  
751 Young, EB et al., 2020. Epidemiologic Features and Clinical Course of Patients Infected With  
752 SARS-CoV-2 in Singapore. Original Investigation *JAMA*. Original Investigation  
753 March 3, 2020Published online March 3, 2020. doi:10.1001/jama.2020.3204.  
754 Zhang C, Gu J, Chen Q, Deng N, Li J, Huang L, Zhou X. 2020a Clinical Characteristics of 34  
755 Children with Coronavirus Disease-2019 in the West of China: a Multiple-center Case  
756 Series <https://doi.org/10.1101/2020.03.12.20034686> doi: medRxiv preprint.  
757 Zhang G, Hu C, Luo L, Fang F, Chen Y, Li J, Peng Z, Pan H. 2020b. Clinical features and  
758 outcomes of 221 patients with COVID-19 in Wuhan, China MedRxiv Preprint.  
759 Doi: <https://doi.org/10.1101/2020.03.02.20030452>.  
760 Zhao J, Yang Y, Huang H, Li D, Gui D, Lu X, Zhang Z, Liu L, Liu T, Liu Y, He Y, Sun B, Wei M, ang  
761 G, Wang X, Zhang L, Zhou X, Xing M, Wang PG. 2020 Relationship between the ABO  
762 Blood Group and the COVID-19 Susceptibility. MedRxiv preprint.  
763 doi: <https://doi.org/10.1101/2020.03.11.20031096>.  
764 Zhou F, Yu T, Du R, Fan G, Liu Y, Liu Z, et al. Clinical course and risk factors for mortality of  
765 adult inpatients with COVID-19 in Wuhan, China: a retrospective cohort study. *The*  
766 *Lancet*. 2020.  
767

## Figure legends

Figure 1. The crude mortality rate (CMR) expressed as the percentage of notified deaths to cases over time, from number of days lapsed since the notification of the tenth case for 12 selected European countries. Data tabulating the notified cases and deaths from all countries is available from the European Centre for Disease Control and Prevention; <https://www.ecdc.europa.eu/en/publications-data/download-todays-data-geographic-distribution-covid-19-cases-worldwide>

Figure 2. The cumulative number of notified cases (grey bars) in Ireland between 30th March and 23<sup>rd</sup> April; the percentage of COVID positive cases that were hospitalised (black line); and those that were admitted to ICU (maroon line) for the same period. Data extracted from publicly available data published by the Health Protection Surveillance Centre (HPSC), Ireland.

Figure 3. The median (maroon square) and 25<sup>th</sup> (blue diamond) and 75<sup>th</sup> percentile (green diamond) for eight relevant articles and reports describing the median (and IQR) length of stay in hospital due to COVID-19 infection. Two studies (Linton et al., 2020; Yuan et al., 2020) reported means (maroon circle) and confidence intervals (diamonds); while one study (Liu et al., 2020) reported median (square) and range (X) for length of stay following COVID-19 infection. The Italian report (COVID-19 Group, 2020) indicates a median of 5 days; no estimate of variance was reported. A subgroup of the Valente-Acosta (2020) article is greyed, as only 4 remained in the group.

Figure 4. The median (blue diamond) and 25<sup>th</sup> (maroon square) and 75<sup>th</sup> percentile (green diamond) for eight relevant articles and reports describing the median (and IQR)

794 length of stay in an ICU due to COVID-19 infection. The Italian report (COVID-19  
795 Group, 2020) indicates a median of 8 days (including ICU stay for deceased patients);  
796 no estimate of variance was reported. The UK report separates survivors from those  
797 who have died in care, the authors also indicate bias towards shorter lengths of stay  
798 as this cohort has completed their ICU stay.  
799  
800



Figure 1.

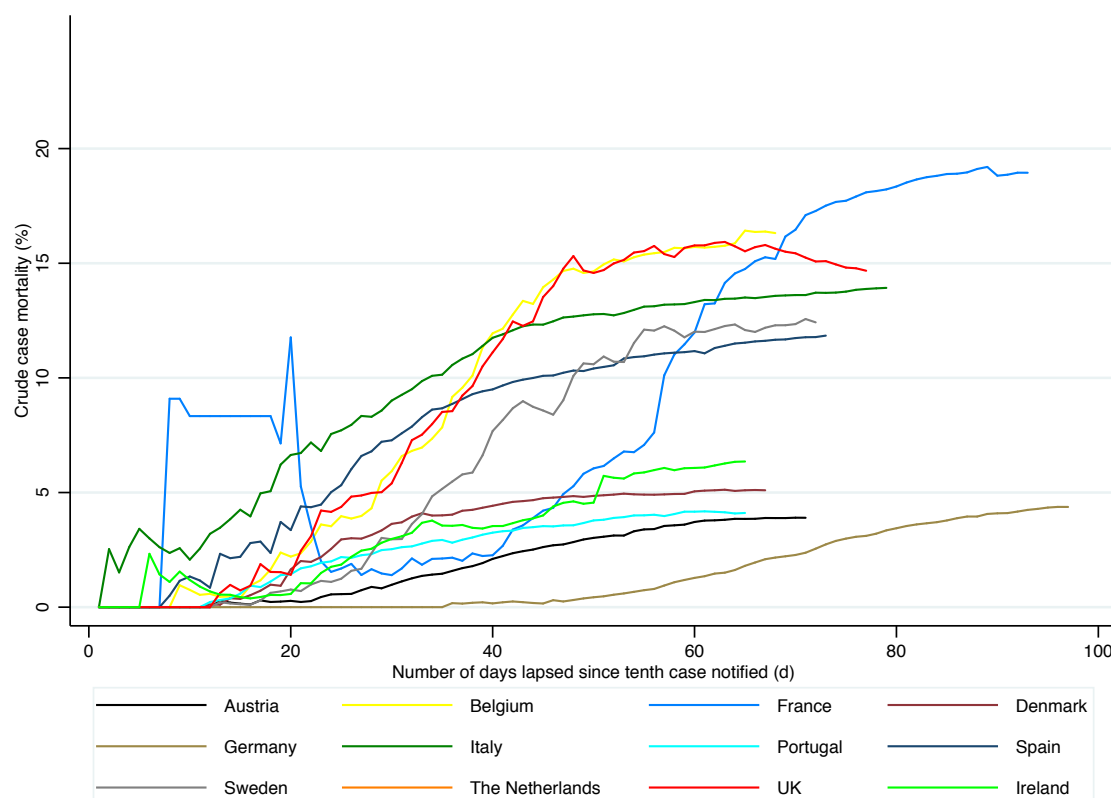

814 Figure 2.

815

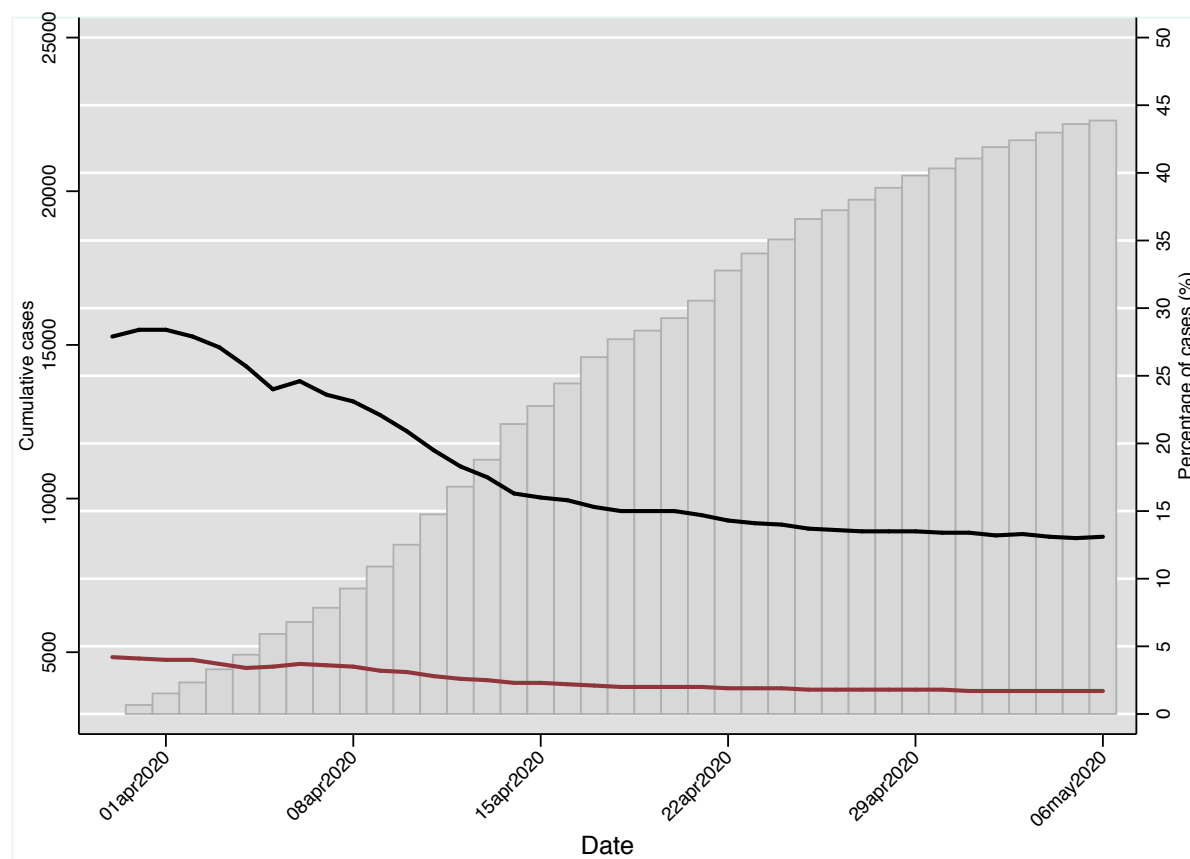

816

Figure 3

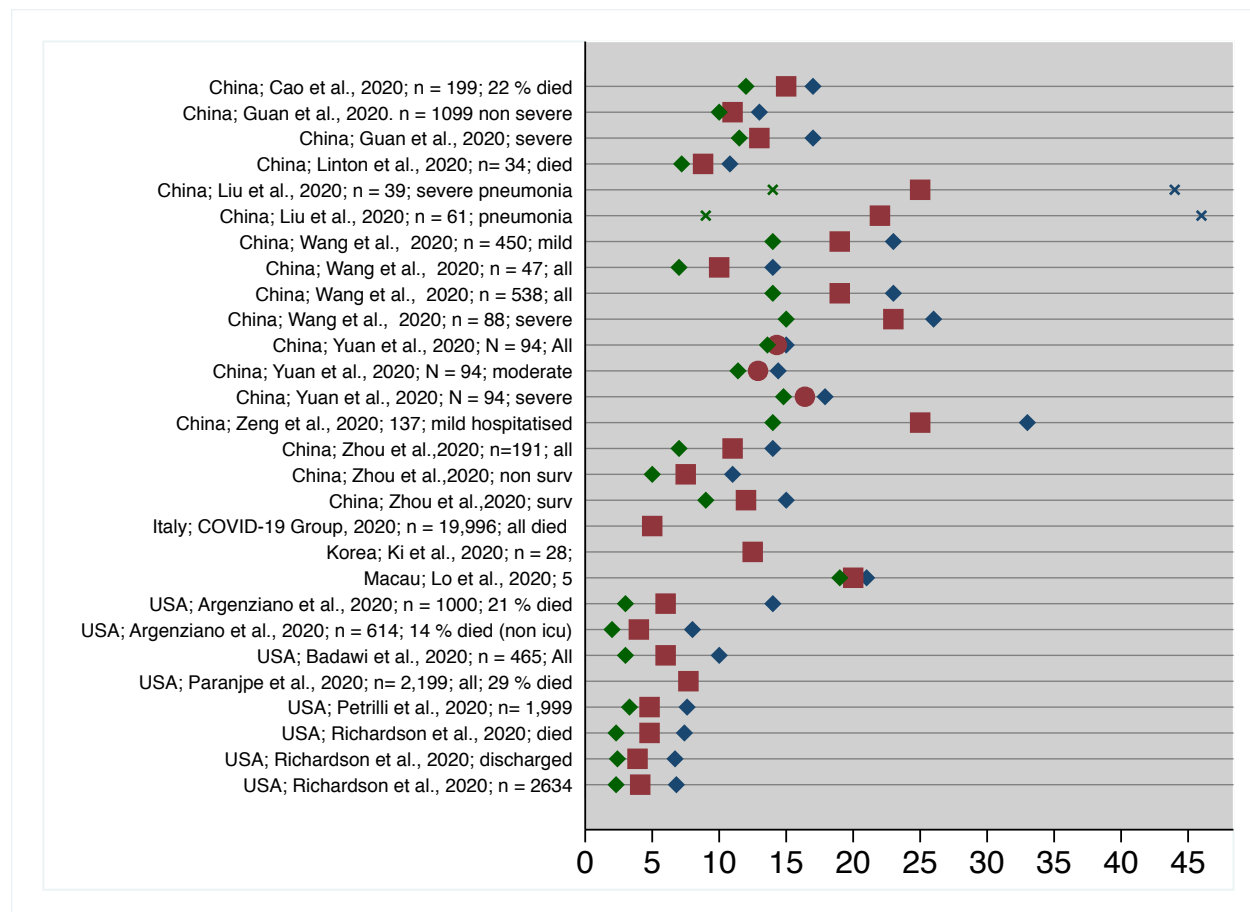

829 Figure 4.

830

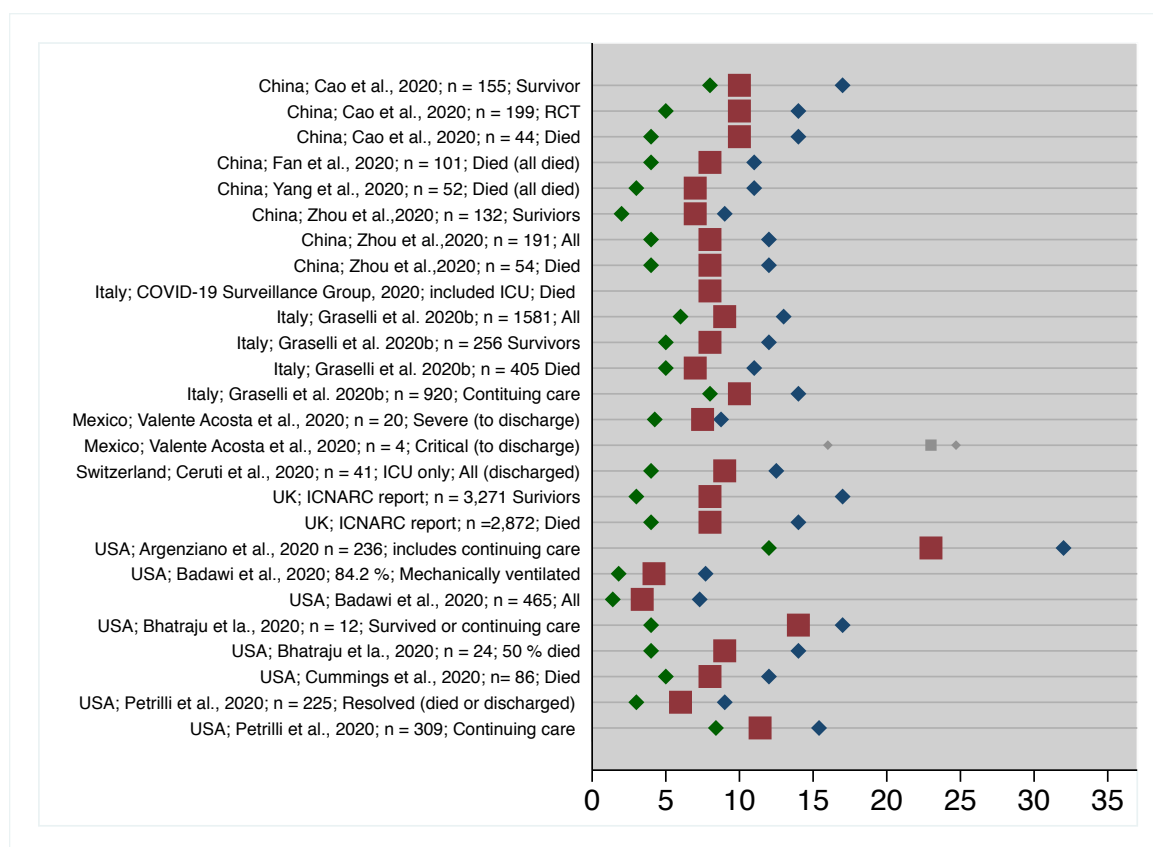

831

832

833

834

835

Table 1. A summary of published articles and reports relating to hospitalisation following COVID-19 infection, by country.

| Paper                      | Location                | Timing                 | Demographics                                                                                                                                                                   | Proportion higher level care                                                                                                                                                                                                                                                 | Time from (days, IQR)                                                                                                                                                                                               | Outcomes                                                                                  | Comments                                                                                                                        |
|----------------------------|-------------------------|------------------------|--------------------------------------------------------------------------------------------------------------------------------------------------------------------------------|------------------------------------------------------------------------------------------------------------------------------------------------------------------------------------------------------------------------------------------------------------------------------|---------------------------------------------------------------------------------------------------------------------------------------------------------------------------------------------------------------------|-------------------------------------------------------------------------------------------|---------------------------------------------------------------------------------------------------------------------------------|
| <b>China</b>               |                         |                        |                                                                                                                                                                                |                                                                                                                                                                                                                                                                              |                                                                                                                                                                                                                     |                                                                                           |                                                                                                                                 |
| Huang et al., 2020 PR      | Wuhan, China            | 16DEC2019 to 02JAN2020 | 41 patients median Age 49 (IQR 41-58) Underlying dx 13 (32 %) Contact to Hunan mkt 27 (66 %)                                                                                   | 13 of 41 to ICU<br>4 of 41 mech vent<br>2 of 41 ECMO                                                                                                                                                                                                                         | Time from symptoms:<br>To Hospital 7, 4 – 8<br>To dysnoea 8, 5 – 13<br>To ARDS 9, 8 – 14<br>Mech vent 10.5, 7 – 14<br>ICU 10.5, 8 – 17                                                                              | 6 (15%) patients died<br>28 (68 %) discharged                                             |                                                                                                                                 |
| Chen et al., 2020          | Wuhan, China            | 01JAN2020 to 20JAN2020 | 99 lab confirmed patients, 49 (49 %) exposure to Hunan market. Mean age 55.5 (SD 13.1), 67 male, 32 female. 50 (51 %) chronic conditions.                                      | 31 (31 %) dyspnoea<br>17 (17 %) ARDS<br>75 (76 %) Oxygen thx<br>Mechanical ventilation<br>Non invasive 13 (13%); median 9, IQR 7 to 19, range 40 to 22 days<br>Invasive 4 (4 %) 17, IQR 12 – 19, range 3 to 20 days<br>CRRT 9 (9 %)<br>ECMO 3 (3 %)                          |                                                                                                                                                                                                                     | 11 (11%) died<br>31 (31 %) discharged<br>57 (58 %) still hospitalized by study cut off    |                                                                                                                                 |
| Guan et al., 2020 PR       | China – 30 provinces    | To 31JAN2020           | 1099 patients. Median age 47 (range 35-58) 41.9 % female                                                                                                                       | 453 (41.3 %) oxygen<br>67 (6.1 %) mech vent<br>55 (5 %) to ICU                                                                                                                                                                                                               |                                                                                                                                                                                                                     | 15 (1.4 %) died<br>93 % continued hospitalisation                                         |                                                                                                                                 |
| Zhou et al., 2020 PR       | Wuhan, China            | To 31JAN2020           | 191 patients. Median age 56 (IQR 46 – 67, Range 18-87<br>Non surv (median 69 yrs)<br>Surv (median 52 yrs)<br>Pre-existing 48 %                                                 |                                                                                                                                                                                                                                                                              | Time to development: dysnoea 7, 4 to 9, to ARDS 12, 8 to 15 to ICU 12, 8 to 15                                                                                                                                      | 54 (28 %) of 191 died<br>137 (72 %) discharged                                            | Median duration of shedding 20 days (longest 37 days)                                                                           |
| Linton et al., 2020 PR     | China                   | To 31JAN2020           | Onset hospital to admission:<br>Living n = 155<br>Dead n= 34<br>Hospital admission to death n= 29<br>Male 58 %, age range 30 – 59 (9 missing)                                  | NR                                                                                                                                                                                                                                                                           | Onset to hospital admission 3.3, CI 2.9 – 5.3 (living)<br>6.5, CI 5.0 – 7.8 (dead)                                                                                                                                  |                                                                                           | Article that collated data from open source and news reports                                                                    |
| Wang et al., 2020 JAMA. PR | Wuhan, China            | 01JAN2020 to 03FEB2020 | 138 patients, median age 56, IQR 42 – 68, range 22-92 yrs. 75 (54.3 % male. ICU patients n = 36 older median age 66 vs 51, underlying conditions 26 (72 %) vs 38 (37.3%).      | ICU 36 of 138 (26.6 %) ARDS 22 of 36 (61.1 %) High flow O2: 4 (11 %) Non invasive ventilation 15 (41.7 %) 17 (47.2 %) invasive ventilation 4 of 36 ECMO                                                                                                                      | Time to dyspnoea 5 days<br>To admission 7 days, ARDS 8 days                                                                                                                                                         | 6 patients (4.3 %) died<br>47 (34.1%) discharged remainder hospitalised at study cut off. | Hospital assoc. transmission suspected 40 (29 %) HCW and 17 (12.3 %) hospitalized patients.                                     |
| Yang et al., 2020          | Wuhan, China            | DEC 2019 to 26JAN2020  | Some 52 (of 710 in cohort) critically ill adult patients confirmed cases admitted to ICU. Mean age 59.7 (SD 13.3) years, 35 (67 %) male, 21 (40 %) had pre-existing conditions | 35 (67 %) ARDS 37 (71 %) mechanical ventilation Compared to survivors, non-survivors were older (64.6 years vs. 51.9 years) more likely to develop ARDS; 26 (81 %) vs. 9 (45 %) patients; and more likely to receive mechanical ventilation; 30 (94 %) vs. 7 (35 %) patients | Interval onset to ICU admission: Surv: 9, 6 – 12. Non-surv 11, 7 – 14.                                                                                                                                              | 32 % died by 28 days                                                                      | Hospital-acquired infection occurred in seven (13.5 %) patients. APACHE II and SOFA score lower in survivors vs. non survivors. |
| Fan et al., 2020 Pre-print | Wuhan China             | 30DEC2019 to 16FEB2020 | 101 patients, mean age 65.5 years (range 24 to 83). 64 males, 37 females. All died. Majority underlying, 25.7 % two conditions.                                                | All (101, 100 %) oxygen therapy, 84 (83.17 %) non-invasive ventilator or high flow oxygen, 79 (78.2%) invasive ventilation. 7 patients ECMO, 8 treated with CRRT                                                                                                             | Onset to hospital 11, 8 to 13.5<br>To death 21, 17 to 27.5<br>To ARDS 12, 9 to 14<br>ARDS to invasive mechanical ventilation 3, 0 to 6.<br>Duration invasive mechanical ventilation 5, 2 to 8; range 1 to 31 days). | All died – criteria for inclusion was death                                               | Early paper - 57 patients lab confirmed, 44 clinically consistent                                                               |
| Xu et al., 2020            | Zhejiang province China | 10JAN2020 to 26JAN2020 | 62 patients median age 41 yrs (IQR 32 – 52 yrs). 35 (56 %) male. 20 of 62 (32 %) had underlying condition.                                                                     | ICU 1 of 62 ARDS 1 of 62 Mechanical ventilation 1 of 62                                                                                                                                                                                                                      | Two patients (3%) shortness of breath on admission. Median time from exposure to onset of                                                                                                                           | 61 of 62 (98 %) hospitalised<br>0 of 62 (0 %) died                                        | Less severe presentations observed in Zhejiang Province compared with                                                           |

|                                                 |                 |                        |                                                                                                                                                                                                                                                                 |                                                                                                                                      |                                                                                                                  |                                                                                                                                                                    |                                                                                                                                                 |
|-------------------------------------------------|-----------------|------------------------|-----------------------------------------------------------------------------------------------------------------------------------------------------------------------------------------------------------------------------------------------------------------|--------------------------------------------------------------------------------------------------------------------------------------|------------------------------------------------------------------------------------------------------------------|--------------------------------------------------------------------------------------------------------------------------------------------------------------------|-------------------------------------------------------------------------------------------------------------------------------------------------|
|                                                 |                 |                        |                                                                                                                                                                                                                                                                 |                                                                                                                                      | was 4, 3-5), Onset to admission was 2, 1-4.                                                                      |                                                                                                                                                                    | Wuhan                                                                                                                                           |
| Wen et al., 2020 Pre-print                      | Shenzhen, China | 01JAN2020 to 28FEB2020 | 417 confirmed cases 37 (8.9 %) mild 344 (82.5 %) moderate. 36 (8.6 %) severe or critical. Mean age 45.4 years. 220 (52.8 %) female.                                                                                                                             |                                                                                                                                      | Time to: Onset to medical visit 1, 0 – 3. Medical visit to admission 0, 0 to 2. admission to PCR result 1, 1 – 3 | 3 (0.7 %) died 299 (71.7%) discharged. 115 (27.6 %) hospitalized at study cutoff                                                                                   | Notes longer time from first medical visit to admission greater severity. Surv cases more likely to severe illness – warning to treat earlier . |
| Wu and McGoogan 2020 Opinion                    | China           | To 11FEB2020           | 72,314 Cases (as of February 11, 2020) Confirmed cases: 44,672 (62%) Suspected cases: 16,186 (22%) Diagnosed cases: 10,567 (15%) Asymptomatic cases: 889 (1%)                                                                                                   | Spectrum of disease (N = 44,415) Mild: 81 % (36,160 cases) Severe: 14 % (6,168 cases) Critical: 5 % (2,087 cases)                    |                                                                                                                  | 1023 of 44,672 (2.3 %) died 208 of 1,408 (14.8%) aged 80+ years 312 of 3,918 (8.0 %) aged 70-79 years 1,023 of 2,087 (49.0 %) critical cases died                  | HCW infected 1,716 of 44,672 (3.8 %) overall 1,080 of 1,716 (63 %) in Wuhan 247 of 1,668 (14.8%) classified severe or critical 5 died           |
| <b>Singapore</b>                                |                 |                        |                                                                                                                                                                                                                                                                 |                                                                                                                                      |                                                                                                                  |                                                                                                                                                                    |                                                                                                                                                 |
| Young et al., 2020 Case Series                  | Singapore       | To 25FEB2020           | 18 patients. Median age was 47 yrs, 50 % male, 50 % female                                                                                                                                                                                                      | 6 of 18 (33.3 %) Oxygen2 of 18 (11.1 %) to ICU 1 of 18 (5.6 %) mech vent                                                             |                                                                                                                  |                                                                                                                                                                    |                                                                                                                                                 |
| <b>Korea</b>                                    |                 |                        |                                                                                                                                                                                                                                                                 |                                                                                                                                      |                                                                                                                  |                                                                                                                                                                    |                                                                                                                                                 |
| Ki et al., 2020 Epi Health Special Article      | Korea           | 20JAN2020 to 10FEB2020 | 28 patients; 15 (53.6 % male. Med age 42 yrs, range 21-73.                                                                                                                                                                                                      |                                                                                                                                      | Onset to diagnosis 4, range 0 – 16. Onset to quarantine / isolation 3, range 0 to 15 days.                       |                                                                                                                                                                    | 3 asymptomatic 4 discharged other continue hospitalisation – none listed as serious at study cut off.                                           |
| <b>Macau</b>                                    |                 |                        |                                                                                                                                                                                                                                                                 |                                                                                                                                      |                                                                                                                  |                                                                                                                                                                    |                                                                                                                                                 |
| Lo et al., 2020 Int J Biol Sci PR               | Macau           | 21JAN2020 to 16FEB2020 | 10 cases. Median age 54 years (IQR 27 to 64). Two patients were assigned a mild classification, four moderate and four severe. 5 of 10 pre-existing condition.                                                                                                  | 10 of 10 hospitalised, 0 of 10 to ICU. 0 of 10 ARDS                                                                                  |                                                                                                                  | 5 discharged and 5 remained hospitalized at study cutoff.                                                                                                          |                                                                                                                                                 |
| <b>Italy</b>                                    |                 |                        |                                                                                                                                                                                                                                                                 |                                                                                                                                      |                                                                                                                  |                                                                                                                                                                    |                                                                                                                                                 |
| Graselli et al., 2020 Opinion                   | Lombardy Italy  | 20FEB2020 to 07MAR2020 | 3,420 cases                                                                                                                                                                                                                                                     | 359 of 3420 (16 %) ICU                                                                                                               |                                                                                                                  |                                                                                                                                                                    |                                                                                                                                                 |
| Cereda et al., 2020 Pre-print                   | Lombardy Italy  | 20FEB2020 to 08MAR2020 | 5,830 cases. 204 asymptomatic Median age 69 yrs (ranged 1 month to 101 yrs). 62% male                                                                                                                                                                           | 204 asymptomatic 5,626 reported symptoms 47 % hospitalized 18 % ICU                                                                  |                                                                                                                  | 346 died highest in older groups 14 % in 75 + yrs                                                                                                                  |                                                                                                                                                 |
| Graselli et al., 2020b PR                       | Lombardy Italy  | 20FEB2020 to 18MAR2020 | 1,591 patients admitted to ICU                                                                                                                                                                                                                                  | 1287 of 1300 (99 %) required respiratory support; 1150 (88 %), mechanical ventilation 137 (11 %,) received non-invasive ventilation. |                                                                                                                  | ICU mortality 26 %. Older patients (n = 786; age 64 years and older) had higher mortality (36 %) than younger patients (n = 795; age aged 63 years or less (15 % ) | ICU patients only; inclusion criterion                                                                                                          |
| COVID-19 Surveillance Group, 2020 Health report | Italy           | Up to 29APR2020        | 25,452 deceased patients. Median age was 81 years (IQR 73 to 87). Females 9,684 (38 %). Overall, 3.8 % presented with a no pre-existing condition, 14.5 % with 1, 21.4 % with 2, and 60.3 % with 3 or more. Number of patients transferred to ICU not reported. | ARDS occurred in 96.7 % of cases                                                                                                     | Median onset symptoms to death 10 days, onset to hospitalization was 5 days (IQR or ranges not presented)        | All patients died (n = 25,452). ARDS in 97.1 % of cases, acute renal failure in 23.3 %. Superinfection 12.6 % and acute cardiac injury in 10.9 % of cases.         | All patients died; inclusion criterion It is not clear what number of patients were transferred to ICU care.                                    |
| <b>Spain</b>                                    |                 |                        |                                                                                                                                                                                                                                                                 |                                                                                                                                      |                                                                                                                  |                                                                                                                                                                    |                                                                                                                                                 |
| Borobia et                                      | Madrid,         | 25FEB2020              | 2,226 of 3,127 patients                                                                                                                                                                                                                                         | 2,226 of 3,127 patients                                                                                                              | Median onset symptoms                                                                                            | 460 of 2,226 died                                                                                                                                                  | Most frequent                                                                                                                                   |

|                                   |                         |                        |                                                                                                                                                                                            |                                                                                                                                                                                                |                                                                                     |                                                                                                                                                                               |                                                                                                                        |
|-----------------------------------|-------------------------|------------------------|--------------------------------------------------------------------------------------------------------------------------------------------------------------------------------------------|------------------------------------------------------------------------------------------------------------------------------------------------------------------------------------------------|-------------------------------------------------------------------------------------|-------------------------------------------------------------------------------------------------------------------------------------------------------------------------------|------------------------------------------------------------------------------------------------------------------------|
| al., 2020                         | Spain                   | to 19APR2020           | were hospitalized. Median age 61, 46 – 78, 52 % female. 78 % at least one pre-existing condition. 41 % hypotensive, 19 % Chronic heart disease, 17 % DM.                                   | were hospitalized. 460 of 2,226 died (20.7 %); or 1,766 of 2,226 (79.3 %) discharged. 237 (10.6 %) admitted to ICU, 116 continued care ICU, 55 died, 20 discharged, 46 discharged to acute bed | to hospital admission 6, 3 – 9 d                                                    | (20.7 %); 1,766 of 2,226 (79.3 %) discharged                                                                                                                                  | complication acute confusional syndrome 197 (9 %), acute kidney failure 173 (8 %) and ARDS 109 (5 %).                  |
| <b>Switzerland</b>                |                         |                        |                                                                                                                                                                                            |                                                                                                                                                                                                |                                                                                     |                                                                                                                                                                               |                                                                                                                        |
| Ceruti et al., 2020               | Switzerland             | 14MAR2020 to 12APR2020 | 41 ICU patients. mean age 64 (-/- 16.5) years, 35 (85 %) male.                                                                                                                             | 41 of 310 (13.2 %) admitted to clinic admitted to ICU. 54 with DNR not considered for ICU admittance.                                                                                          |                                                                                     | 10 died (24 %); 2 transferred out; 24 (61 %) discharge                                                                                                                        | 41 patients addmitted to ICU from 310 at clinic. 34 (83 %) required mechanical ventilaton. 25 (61 %) to discharge.     |
| <b>USA</b>                        |                         |                        |                                                                                                                                                                                            |                                                                                                                                                                                                |                                                                                     |                                                                                                                                                                               |                                                                                                                        |
| Kujawski et al., 2020 Case series | USA 6 States 6 of 12 CA | 20JAN2020 to 05FEB2020 | 12 patients. Median age 53 yrs (range 21 to 68). 8 male. 4 of 5 with underlying conditions hospitalised                                                                                    | Hospitalisation 7 of 12. 5 of 12 Dyspnoea 4 of 12 supplemental oxygen ICU 1 of 12 patient                                                                                                      | Onset to resolution 14 range 6 to 20                                                | 11 of 12 discharged or home isolation 1 hospitalized at study cut off ( in ICU)                                                                                               | Case series n = 12.                                                                                                    |
| CDC COVID-19 Response Team Report | USA                     | 12FEB2020 to 16MAR2020 | 4,226 cases. Hospitalization status missing 1,514 cases. ICU status missing or 2,253 cases. Illness outcome or death missing or unknown for 2,001 cases                                    | Hospitalisation in 20.7 to 31.4 % of cases, with ICU admission required for 4.9 to 11.5 %.                                                                                                     |                                                                                     | Case fatality estimates: ≥85 years, ranging from 10% to 27%, 65 – 84 yrs: 3% to 11% persons, 55 – 64 years: 1% to 3%                                                          | Estimate range presented to account for missing data                                                                   |
| Badawi et al., 2020               | USA New York City       | 23MAR2020 to 06APR2020 | Hourly results from 186 ICU beds from 14 ICUs and 9 hospitals. 465 patients.                                                                                                               | Mean age 63.7 (SD +/- 14.3). 312 (67 %) male.                                                                                                                                                  |                                                                                     | During pandemic - DRS highest reached 37.5 (1.5 – 71.5) versus (0.9 (0.2 to 7.1; pre pandemic. Last DRS before ICU discharge: 17.5 (0.8 – 71) vs 0.3 (0.1 – 1.2 pre-pandemic. |                                                                                                                        |
| Myers et al., 2020                | USA, California         | 01MAR2020 to 30MAR2020 | 377 of 1,299 est positive hospitalised. Median age 61, 50 – 73 years. 212 (56 %) male.                                                                                                     | Hospitalisation 29 % (377 of 1,299 test positives. 113 (8.7 %) to ICU                                                                                                                          |                                                                                     | Of 321 with resolved status; 50 (15.6 % died). 34 of 68 (50 %) ICU patients died.                                                                                             | Invasive ventilation in 110 of 377 (29 %) patients, 103 of 113 (91 %) ICU patients.                                    |
| Cummings et al., 2020             | US, New York            | 02MAR2020 to 01APR2020 | 257 of 1,150 hospitalised patients categorised critical. Median age 62, 51 – 72. 170 of 257 ((66 %) male. 82 % at least one pre-existing condition.                                        | Of those enrolled 257 of 1,150 (22 %) transferred to ICU,                                                                                                                                      | Onset to presentation 6 (SD +/- 5) d.                                               | 86 of 257 (33 %) died in hospital. 122 of 257 continuing care. 4 transferred. 45 of 257 discharged alive.                                                                     | 201 of 257 received invasive mechanical ventilation. 13, 9 – 17 d.                                                     |
| Paranjpe et al, 2020              | USA New York City       | 27FEB2020 to 02APR2020 | 2,199 COVID-19 positive hospitalised patients. Median age 65, 75 if died, 59 if discharged. Pre-existing conditions in 46 % of discharged, 64 % of died patients.                          | All hospitalised. 1,078 completed stay, 36 % admitted to ICU care during stay.                                                                                                                 |                                                                                     | Of 1,078 with resolved status; 768 (71 %) discharged, 310 (29 %) died.                                                                                                        | All hospitalised. 1,078 completed stay                                                                                 |
| Richardson et al., 2020           | USA, New York           | 01MAR2020 to 04APR2020 | 5700 patients. Median age 63, 52 – 75 yrs. 2263 (39.7 %) female. 350 (6.1 %) no pre-existing condition, 359 (6.3 %) had 1 pre-existing condition, 4,991 (88 %) > 1 pre-existing condition. | All admitted to 1 of 12 hospitals in New York. 373 of 2634 (14.2 %) of patients who completed stay transferred to IC. 320 (12.2 %) required mechanical ventilation.                            |                                                                                     |                                                                                                                                                                               | 553 of 2,634 (21 %) died. Mortality for mechanically ventilated patients 88.1 %. 45 (2.2 %) patients were re-admitted. |
| Argenziano et al., 2020           | USA, New York           | 01MAR2020 to 05APR2020 | 1000 patients. 150 ED only treatment, 614 admitted to general wards, 236 admitted to ICU. Median age 63, 50 75. 596 (60 %) male. Only 82 (8.2 %) no pre-existing                           | Of 2,423 tested, 1,403 positive, 1,132 received ED or hospital care. 1000 followed up. 23.6 % admitted to ICU care.                                                                            | Time to initial intubation (136 patients) was bimodal, 3 4 d, or 9 days post onset. | At cutoff 90 (9 %) continuing care 699 (70 %) discharged; 211 (21.1 %) died. 103 of 236 (43.6 %)                                                                              | Of the 150 ED only patients; 85 % discharged, 14.7 % died before admission. 233 (23.3 %)                               |

|                      |                                     |              |                                                                                          |                                                                                                                                             |  |                                                                                           |                                                                                                                                                           |
|----------------------|-------------------------------------|--------------|------------------------------------------------------------------------------------------|---------------------------------------------------------------------------------------------------------------------------------------------|--|-------------------------------------------------------------------------------------------|-----------------------------------------------------------------------------------------------------------------------------------------------------------|
|                      |                                     |              | conditions. 75 % BMI > 25.                                                               |                                                                                                                                             |  | ICU cases died.                                                                           | intubated at least once. Duration of mechanical ventilation 6, 2 – 13 days if died; 9, 6.5 – 12 d if discharged.; and 28, 22.5 – 32 d if continuing care. |
| Lewnard et al., 2020 | USA California and Washington state | To 09APR2020 | 1,277 patients. Median age 60, 47 – 72. 56.8 % male. 817 of 1,299 (64 %) completed stay. | 158 of 617 (25.6 %) admitted to ICU (data not available from Washington State)<br><br>Estimates of admissions to ICU 41.9 % (34.1 – 51.4 %) |  | Mortality 119 of 772 (15.4 %).<br><br>Estimates for ICU fatalities 17.8 % (14.3 – 22.2 %) | Adjusted for censored data and status of new hospitalizations - hence estimates calculated.                                                               |
| <b>Ireland</b>       |                                     |              |                                                                                          |                                                                                                                                             |  |                                                                                           |                                                                                                                                                           |
| HPSC Ep Team 2020a   | Ireland                             | To 30MAR2020 | 2,990 confirmed cases. Median age 48, range 0 to 99 years.                               | Hospitalisation in 834 of 2,990 (27.9 %) of cases. ICU in 126 of 2,990 cases (4.2 %)                                                        |  |                                                                                           | 84 (2.8 % died)                                                                                                                                           |
| HPSC Ep Team 2020b   | Ireland                             | To 13APR2020 | 11,261 confirmed cases. Median age 48, range 0 to 106 years.                             | Hospitalisation in 1,968 of 11,261 (17.5 %) of cases. ICU in 280 of 11,261 cases (2.5 %)                                                    |  |                                                                                           | 435 (3.9 %) died<br><i>Data includes HPSC Ep Team 2020b</i>                                                                                               |
| HPSC Ep Team 2020c   | Ireland                             | To 27APR2020 | 19,723 confirmed cases. Median age 49 range 0 to 106 years.                              | Hospitalisation in 2,669 of 19,723 (13.5%) of cases. ICU in 355 of 19,723 cases (1.7 %)                                                     |  |                                                                                           | 962 (4.9 %) died<br><i>Data includes HPSC Ep Team 2020a 2020b and 2020c and 2020d above</i>                                                               |
| HPSC Ep Team 2020d   | Ireland                             | To 04MAY2020 | 21,908 confirmed cases. Median age 49 range 0 to 106 years.                              | Hospitalisation in 2,878 of 21,908 (13.1%) of cases. ICU in 373 of 21,908 cases (1.7 %)                                                     |  |                                                                                           | 1,128 (5.1 %) died<br><i>Data includes HPSC Ep Team 2020a 2020b and 2020c and 2020d and 2020e above</i>                                                   |

836

837

838

839

840

841

842

843

844

845

846

847



848

849

Table 2. A summary of published articles and reports relating to length of stay in an non ICU settings following COVID-19 infection, by country.

| Paper                                           | Location                 | Timing                 | Demographics                                                                                                                                                                                                                                                           | LOS, median (days), IQR                                                                                                                                | Outcomes                                                                                                                               | Comments                                                                                                     |
|-------------------------------------------------|--------------------------|------------------------|------------------------------------------------------------------------------------------------------------------------------------------------------------------------------------------------------------------------------------------------------------------------|--------------------------------------------------------------------------------------------------------------------------------------------------------|----------------------------------------------------------------------------------------------------------------------------------------|--------------------------------------------------------------------------------------------------------------|
| <b>China</b>                                    |                          |                        |                                                                                                                                                                                                                                                                        |                                                                                                                                                        |                                                                                                                                        |                                                                                                              |
| Guan et al., 2020 PR                            | China 30 provinces       | To 31JAN2020           | 1099 patients. Median age 47 (range 35-58) 41.9 % female                                                                                                                                                                                                               | 11, 10 – 13 non severe 13, 11.5 to 17 severe                                                                                                           | 15 (1.4 %) died 93 % continued hospitalisation                                                                                         |                                                                                                              |
| Zhou et al., 2020 PR                            | Wuhan, China             | To 31JAN2020           | 191 patients. Median age 56 (IQR 46 – 67) Non surv (median 69 yrs) Surv (median 52 yrs) Pre-exisitng 48 %                                                                                                                                                              | 11, 7 – 14 All 7.5, 5 – 11 Non surv 12, 9 – 15 Surv                                                                                                    | 54 (28 %) of 191 died 132 (72 %) discharged                                                                                            | Median duration of shedding 20 days (longest 37 days)                                                        |
| Linton et al., 2020 PR                          | China                    | To 31JAN2020           | Onset to hospital admission: Living n = 155 Dead n= 34 Hospital admission to death n= 29 Male 58 %, age rage 30 – 59 (9 missing)                                                                                                                                       | 8.8, CI 7.2 – 10.8 died only, n = 34                                                                                                                   |                                                                                                                                        | Article that collated data from open source and news reports                                                 |
| Wang et al., 2020 JAMA. PR                      | Wuhan, China             | 01JAN2020 to 03FEB2020 | 138 patients, median age 56, IQR 42 - 68, range 22- 92 yrs. 75 (54.3 % male. Hospital assoc. transmission suspected 40 (29 %) HCW and 17 (12.3 %) hospitalized patients. ICU patients n = 36 older median age 66 vs 51, underlying conditions 26 (72 %) vs 38 (37.3%). | 10, 7 to 14 discharged n = 47                                                                                                                          | 6 patients (4.3 %) died 47 (34.1%) discharged remainder hospitalised at study cut off.                                                 |                                                                                                              |
| Cao et al., 2020                                | Wuhan China              | 18JAN2020 to 03FEB2020 | 199 patients; age 58, 49 – 68. 120 (60 %) male.                                                                                                                                                                                                                        | 15, 12 - 17                                                                                                                                            | 44 (22.1 %) died                                                                                                                       | open-label, individually randomized, controlled trial                                                        |
| Fan et al., 2020 Pre-print                      | Wuhan China              | 30DEC2019 to 16FEB2020 | 101 patients, mean age 65.5 years (range 24 to 83). 64 males, 37 females. All died. Majority underlying, 25.7 % two conditions.                                                                                                                                        | Days in general ward 0 (0 to 4 days). 54 of 101 transferred to ICU                                                                                     | All died – criteria for inclusion was death                                                                                            | Early paper - 57 patients lab confirmed, 44 clinically consistent                                            |
| Yuan et al., 2020 PR                            | Zhenzhe n China          | 11JAN2020 to 13FEB2020 | 94 discharged patients with COVID-19 infection Median age 40 (range 1 to 78 years). Males accounted for 42 of 94 cases.                                                                                                                                                | mean 14.3 (CI 13.6 - 15.0) All 12.9 (CI 11.4 - 14.4) moderate n = 8 16.4 (CI 14.8 - 17.9) Severe cases n = 11                                          |                                                                                                                                        | All 94 patients discharged. Inclusion criterion.                                                             |
| Wang et al., 2020-04-21 rePrint                 | Sichuan China            | 16JAN2020 to 04MAR2020 | 538 lab confirmed COVID. Median age 45 (271 (50%) were over 45). 285 (53 %) were male. 450 (84 %) classified mild illness.                                                                                                                                             | 19, 14 – 23 (all) 21, 14 – 24 Over 45 yrs 18, 13 – 22 Under 45 yrs 19, 14 – 24 Male 19, 14 – 23 Female 19, 14 – 23 Mild cases 23, 15 – 26 Severe cases |                                                                                                                                        | 364 of 538 discharged 174 unresolved or died                                                                 |
| Zeng et al., 2020                               | Beijing and Wuhan, China | 05FEB2020 to 20MAR2020 | 137 mild patients. Median age 52 (40 – 64) years. 74 (54 %) male.                                                                                                                                                                                                      | 25, 14 – 33 Mild LOS severe cases not reported                                                                                                         |                                                                                                                                        |                                                                                                              |
| <b>Korea</b>                                    |                          |                        |                                                                                                                                                                                                                                                                        |                                                                                                                                                        |                                                                                                                                        |                                                                                                              |
| Ki et al., 2020 Epi Health Special Article      | Korea                    | 20JAN2020 to 10FEB2020 | 28 patients; 15 (53.6 % male. Med age 42 yrs, range 21-73.                                                                                                                                                                                                             | Dx to discharge: 12.5, range 7 to 17.                                                                                                                  |                                                                                                                                        | 3 asymptomatic 4 discharged other continue hospitalisation – none listed as serious at study cut off.        |
| <b>Macau</b>                                    |                          |                        |                                                                                                                                                                                                                                                                        |                                                                                                                                                        |                                                                                                                                        |                                                                                                              |
| Lo et al., 2020 Int J Biol Sci PR               | Macau                    | 21JAN2020 to 16FEB2020 | 10 cases. Median age 54 years (IQR 27 to 64). Two patients were assigned a mild classification, four moderate and four severe. 5 of 10 pre-existing condition.                                                                                                         | 20, 19 – 21                                                                                                                                            |                                                                                                                                        | 5 remained hospitalised at study cutoff                                                                      |
| <b>Italy</b>                                    |                          |                        |                                                                                                                                                                                                                                                                        |                                                                                                                                                        |                                                                                                                                        |                                                                                                              |
| COVID-19 Surveillance Group, 2020 Health report | Italy                    | Up to 29APR2020        | 25,452 deceased patients. Median age was 81 years (IQR 73 to 87). Females 9,684 (38 %). Overall, 3.8 % presented with a no pre-existing condition, 14.5 % with 1, 21.4 % with 2, and 60.3 % with 3 or more.                                                            | 5 , variation not presented                                                                                                                            | All patients died (n = 25,452). ARDS in 97.1 % of cases, acute renal failure in 23,3 %. Superinfection 12.6 % and acute caridac injury | All patients died; inclusion criterion it is not clear what number of patients were transferred to ICU care. |

|                         |                                     |                        |                                                                                                                                                                                                                                                                                                                                                     |                                                                                                                              |                                                                                                                               |                                                                                                                                                                                                            |
|-------------------------|-------------------------------------|------------------------|-----------------------------------------------------------------------------------------------------------------------------------------------------------------------------------------------------------------------------------------------------------------------------------------------------------------------------------------------------|------------------------------------------------------------------------------------------------------------------------------|-------------------------------------------------------------------------------------------------------------------------------|------------------------------------------------------------------------------------------------------------------------------------------------------------------------------------------------------------|
|                         |                                     |                        | Number of patients transferred to ICU not reported.                                                                                                                                                                                                                                                                                                 |                                                                                                                              | in 10.9 % of cases.                                                                                                           |                                                                                                                                                                                                            |
| <b>USA</b>              |                                     |                        |                                                                                                                                                                                                                                                                                                                                                     |                                                                                                                              |                                                                                                                               |                                                                                                                                                                                                            |
| Paranjpe et al, 2020    | USA New York City                   | 27FEB2020 to 02APR2020 | 2,199 COVID-19 positive hospitalised patients. Median age 65, 75 if died, 59 if discharged. Pre-existing conditions in 46 % of discharged, 64 % of died patients.                                                                                                                                                                                   | 7.7, variation not presented                                                                                                 | Of 1,078 with resolved status; 768 (71 %) discharged, 310 (29 %) died.                                                        | All patients hospitalised, 36 % admitted to ICU, no LOS specific to ICU presented. Suggests LOS accounts for censored data (50% completed stay).                                                           |
| Petrilli et al., 2020   | New York USA                        | 01MAR2020 to 02APR2020 | 4,103 positive cases, of which 1,999 hospitalised. mean 52 yrs (36 – 65). 2072 (50.5 %) male. 1,999 hospitalised, 650 critical, 116 died or hospice, 534 to ICU.                                                                                                                                                                                    | 4.8, 3.3 – 7.6 (if resolved)                                                                                                 | 292 of 1,999 (14.6 %) died or transferred to hospice. 981 followed to discharge                                               | 1,999 of 4,103 positive were hospitalised.                                                                                                                                                                 |
| Richardson et al., 2020 | USA, New York                       | 01MAR2020 to 04APR2020 | 5,700 patients. Sequentially hospitalised. Median age 63, 52 – 75 yrs. 2263 (39.7 %) female.                                                                                                                                                                                                                                                        | 4.1, 2.3 – 6.8<br>3.9, 2.4 – 6.7 discharged<br>4.8, 2.3 – 7.4 died                                                           | 553 of 2,634 (21 %) died                                                                                                      | 2,634 of 5,700 admitted followed to death or discharge                                                                                                                                                     |
| Argenziano et al., 2020 | USA, New York                       | 01MAR2020 to 05APR2020 | 1000 patients. 150 ED only treatment, 614 admitted to general wards, 236 to ICU.<br><br>Median age (all) 63, 50 75. 596 (60 %) male. Only 82 (8.2 %) no pre-existing conditions. 75 % BMI > 25.<br><br>Median age (n = 614 hospitalised non icu) 64, 51 – 77. 353 of 614 (57.5 %) male. 57 of 614 (9.3 %) no pre-existing conditions. 75 % BMI > 25 | 6, 3 – 14 All n=1,000<br>4, 2 – 8 Hospitalised non icu                                                                       | At cutoff 90 (9 %) continuing care 699 (70 %) discharged; 211 (21.1 %) died.<br><br>86 of 614 (14 %) hospitalised cases died. | Of the 150 ED only patients; 85 % discharged, 14.7 % died before admission.                                                                                                                                |
| Badawi et al., 2020     | USA New York City                   | 23MAR2020 to 06APR2020 | Mean age 63.7 (SD +/- 14.3). 312 (67 %) male.                                                                                                                                                                                                                                                                                                       | 6, 3 – 10 (including ICU)                                                                                                    |                                                                                                                               | Study examined ICU occupancy. During pandemic - DRS highest reached 37.5 (1.5 – 71.5) versus 0.9 (0.2 to 7.1; pre pandemic. Last DRS before ICU discharge: 17.5 (0.8 – 71) vs 0.3 (0.1 – 1.2 pre-pandemic. |
| Lewnard et al., 2020    | USA California and Washington state | To 09APR2020           | 1,277 patients. Median age 60, 47 – 72. 56.8 % male. 817 of 1,299 (64 %) completed stay.                                                                                                                                                                                                                                                            | Mean reported 11.3, IQR 5.1 – 15.6, normal range (NR) 0.9 – 31.3 All 10.7 (surv) NR 0.8 – 30.1 13.7 (non surv) NR 1.7 – 34.6 | Mortality at cutoff 09APR 119 of 772 (15.4 %).                                                                                | Adjusted for censored data                                                                                                                                                                                 |

850

851

852

853

854

855

856

857

858

859

860  
861

Table 3. A summary of published articles and reports relating to length of stay in an ICU setting following COVID-19 infection, by country.

| Paper                                           | Location       | Timing                 | Demographics                                                                                                                                                                                                                                                    | ICU; LOS median (days), IQR                                                                                           | Outcomes                                                                                                                                                                                                                     | Comments                                                                                                                                              |
|-------------------------------------------------|----------------|------------------------|-----------------------------------------------------------------------------------------------------------------------------------------------------------------------------------------------------------------------------------------------------------------|-----------------------------------------------------------------------------------------------------------------------|------------------------------------------------------------------------------------------------------------------------------------------------------------------------------------------------------------------------------|-------------------------------------------------------------------------------------------------------------------------------------------------------|
| <b>China</b>                                    |                |                        |                                                                                                                                                                                                                                                                 |                                                                                                                       |                                                                                                                                                                                                                              |                                                                                                                                                       |
| Chen et al., 2020                               | Wuhan, China   | 01JAN2020 to 20JAN2020 | 99 patients. Mean age 55.5 (SD 13.1), 67 male, 32 female. 50 (51 %) chronic conditions.                                                                                                                                                                         | 9 and 11 days ICU n= 2 both died                                                                                      | 11 (11%) died<br>31 (31 %) discharged<br>57 (58 %) still hospitalized by study cut off                                                                                                                                       | Lab confirmed                                                                                                                                         |
| Zhou et al., 2020 PR                            | Wuhan, China   | To 31JAN2020           | 191 patients. Median age 56 (IQR 46 – 67)<br>Non surv (median 69 yrs)<br>Surv (median 52 yrs)<br>Pre-existing 48 %                                                                                                                                              | 8, 4 – 12 ICU<br>7, 2 -9 Surv<br>8, 4 -12 Non surv                                                                    | 54 (28 %) of 191 died<br>132 (72 %) discharged                                                                                                                                                                               |                                                                                                                                                       |
| Yang et al., 2020                               | Wuhan, China   | DEC 2019 to 26JAN2020  | 52 critically ill patients of 710 in cohort admitted to ICU. Mean age 59.7 (SD 13.3) years, 35 (67 %) male, 21 (40 %) had pre-existing conditions                                                                                                               | 7, 3–11 ICU to death                                                                                                  |                                                                                                                                                                                                                              | ICU care only included                                                                                                                                |
| Cao et al., 2020                                | Wuhan China    | 18JAN2020 to 03FEB2020 | 199 patients; age 58, 49 – 68. 120 (60 % male).                                                                                                                                                                                                                 | 10, 5 – 14 All<br>10, 8 – 17 Surv<br>10, 4 – 14 non surv                                                              | 44 (22.1 %) died                                                                                                                                                                                                             | open-label, individually randomized, controlled trial                                                                                                 |
| Fan et al., 2020 Pre-print                      | Wuhan China    | 30DEC2019 to 16FEB2020 | 101 patients, mean age 65.5 years (range 24 to 83). 64 males, 37 females. All died. Majority underlying, 25.7 % two conditions.                                                                                                                                 | 47 of 101 direct to ICU: 8, 4 to 11.                                                                                  | All died                                                                                                                                                                                                                     | 57 patients lab confirmed, 44 clinically consistent, all died                                                                                         |
| <b>Singapore</b>                                |                |                        |                                                                                                                                                                                                                                                                 |                                                                                                                       |                                                                                                                                                                                                                              |                                                                                                                                                       |
| Young et al., 2020 Case series                  | Singapore      | To 25FEB2020           | 2 of 18 admitted to ICU. Median age was 47 yrs, 50 % male, 50 % female                                                                                                                                                                                          | Mean 6 (range 5 – 7)                                                                                                  |                                                                                                                                                                                                                              |                                                                                                                                                       |
| <b>Italy</b>                                    |                |                        |                                                                                                                                                                                                                                                                 |                                                                                                                       |                                                                                                                                                                                                                              |                                                                                                                                                       |
| Graselli et al. 2020b PR                        | Lombardy Italy | 20FEB2020 to 18MAR2020 | 1,591 patients admitted to ICU, with 1,581 ICU info available                                                                                                                                                                                                   | 9, 6 – 13; All<br>10, 8 – 14; continuing care n = 920<br>8, 5 – 12; discharged n = 256<br><br>7, 5 – 11; died n = 405 | ICU mortality 26 %.<br>64 + yrs (n = 786) 36 % died<br>63 or younger (n = 795) 15 % died.<br>At study cut off:<br>405 of 1,581 (26 %) died in ICU<br>256 of 1,591 (16 %) discharged<br>920 of 1,591 (58 %) continued in ICU. | ICU patients only; inclusion criterion                                                                                                                |
| COVID-19 Surveillance Group, 2020 Health report | Italy          | Up to 29APR2020        | 25,452 deceased patients. Median age was 81 years (IQR 73 to 87). Females 9,684 (38 %). Overall, 3.8 % presented with a no pre-existing condition, 14.5 % with 1, 21.4 % with 2, and 60.3 % with 3 or more. Number of patients transferred to ICU not reported. | 8 (if included ICU care; IQR or range not presented).                                                                 | All patients died. ARDS in 97.1 % of cases, acute renal failure in 23.3 %. Superinfection 12.6 % and acute cardiac injury in 10.9 % of cases.                                                                                | All patients died; inclusion criterion It is not clear what number of patients were transferred to ICU care.                                          |
| <b>Switzerland</b>                              |                |                        |                                                                                                                                                                                                                                                                 |                                                                                                                       |                                                                                                                                                                                                                              |                                                                                                                                                       |
| Ceruti et al., 2020                             | Switzerland    | 14MAR2020 to 12APR2020 | 41 ICU patients. mean age 64 (-16.5) years, 35 (85 %) male.                                                                                                                                                                                                     | 9, 4 – 12.5; discharged                                                                                               | 10 died (24 %); 2 transferred out; 24 (61 %) discharge                                                                                                                                                                       | 41 patients admitted to ICU from 310 at clinic. 34 (83 %) required mechanical ventilation. 25 (61 %) to discharge. Median duration of MV 7, 3 – 10 d. |
| <b>UK</b>                                       |                |                        |                                                                                                                                                                                                                                                                 |                                                                                                                       |                                                                                                                                                                                                                              |                                                                                                                                                       |
| ICNARC, 2020a 08MAY2020                         | UK             | Up to 08MAY2020        | 8,250 Patients. Age 60, 51 – 67. 5,879 (72%) Male. 5,580 of 7,594 (73 %) patients had BMI ≥ 25.                                                                                                                                                                 | ICU: 8, 3 – 17; Surv n = 3,271<br>8, 4 – 14; Non surv, n = 2,872                                                      | 6,143 of 8,250 completed ICU care: 3,271 of 6,143 (55 %) alive                                                                                                                                                               | 4,861 of 8,250 (64%) mechanical vent within 24 hrs<br>APACHE II score 14,                                                                             |

|                                   |                                     |                        |                                                                                                                                                                                                                                                                                         |                                                                    |                                                                                                                              |                                                                                                                                                                                                             |
|-----------------------------------|-------------------------------------|------------------------|-----------------------------------------------------------------------------------------------------------------------------------------------------------------------------------------------------------------------------------------------------------------------------------------|--------------------------------------------------------------------|------------------------------------------------------------------------------------------------------------------------------|-------------------------------------------------------------------------------------------------------------------------------------------------------------------------------------------------------------|
|                                   |                                     |                        |                                                                                                                                                                                                                                                                                         | 1, 0 to 3 Pre ICU LOS, n = 7,524                                   | 2,872 of 6,143 (47 %) died                                                                                                   | 11 – 18; n = 7,835                                                                                                                                                                                          |
| <b>USA</b>                        |                                     |                        |                                                                                                                                                                                                                                                                                         |                                                                    |                                                                                                                              |                                                                                                                                                                                                             |
| Kujawski et al., 2020             | USA<br>6 States<br>6 of 12<br>CA    | 20JAN2020 to 05FEB2020 | 12 patients. Median age 53 yrs (range 21 to 68). 8 male. 4 of 5 with underlying conditions hospitalised                                                                                                                                                                                 | 5                                                                  | 11 of 12 discharged or remained home isolation<br>1 remained hospitalized at study cut off (patient who was admitted to ICU) | Case series n = 12.                                                                                                                                                                                         |
| Bhatraju et al., 2020 Case Series | Seattle, USA                        | 24FEB2020 to 09MAR2020 | 24 Patients. Mean age 64 ± 18 yrs, 63 % male                                                                                                                                                                                                                                            | 9, 4 to 14 All ICU<br>14, 4 – 17 Surv only                         |                                                                                                                              | All ICU, inclusion criterion<br>12 of 24 died<br>Surv only:<br>5 discharged home<br>4 discharged to general wards<br>3 remained on mechanical ventilation                                                   |
| Cummings et al., 2020             | US, New York                        | 02MAR2020 to 01APR2020 | 257 of 1,150 hospitalised patients categorised critical. Median age 62, 51 – 72. 170 of 257 ((66 %) male. 82 % at least one pre-existing condition.                                                                                                                                     | 8, 5 – 12 (died only)                                              | 86 of 257 (33 %) died in hospital. 122 of 257 continuing care. 4 transferred. 45 of 257 discharged alive.                    | 201 of 257 received invasive mechanical ventilation. 13, 9 – 17 d.                                                                                                                                          |
| Petrilli et al., 2020             | New York USA                        | 01MAR2020 to 02APR2020 | 4,102 hospitalised patients . mean 52 yrs (36 – 65). 2072 (50.5 %) male. 1,999 hospitalised, 650 critical, 116 died or hospice, 534 to ICU.                                                                                                                                             | 6, 3 – 9 (discharge or died)<br>11.4, 8.4 – 15.4 (continuing care) | Of 534 to ICU, 176 died or to hospice, 49 discharged, 309 continuing care                                                    | 1,999 of 4,103 positive were hospitalised.                                                                                                                                                                  |
| Argenziano et al., 2020           | New York USA                        | 01MAR2020 to 05APR2020 | 1000 patients. 150 ED only treatment, 614 admitted to general wards, 236 to ICU.<br><br>Median age (all) 63, 50 75. 596 (60 %) male. Only 82 (8.2 %) no pre-existing conditions. 75 % BMI > 25.2.<br><br>Median age (ICU n = 236) 62, 52 – 72. 158 of 236 (67 %) male. 75 % BMI > 25.7. | 23, 12 – 32 includes ICU                                           | At cutoff<br>87 (37 %) continuing care<br>46 (20 %) discharged;<br>103 (44 %) ICU cases died                                 | Of the 150 ED only patients; 85 % discharged, 14.7 % died before admission.                                                                                                                                 |
| Badawi et al., 2020               | USA New York City                   | 23MAR2020 to 06APR2020 | Data relates to 465 patients. Mean age 63.7 (SD +/- 14.3). 312 (67 %) male.                                                                                                                                                                                                             | 3.8, 1.4 – 7.3<br>4.2, 1.8 – 7.7 (Mechanically ventilated)         |                                                                                                                              | Study examined ICU occupancy. During pandemic - DRS highest reached 37.5 (1.5 – 71.5) versus (0.9 (0.2 to 7.1; pre pandemic. Last DRS before ICU discharge: 17.5 (0.8 – 71) vs 0.3 (0.1 – 1.2 pre-pandemic. |
| Lewnard et al., 2020              | USA California and Washington state | To 09APR2020           | 1,277 patients. Median age 60, 47 – 72. 56.8 % male. 817 of 1,299 (64 %) completed stay. 158 of 617 (25.6 %) admitted to ICU (data not available from Washington State)                                                                                                                 | Mean, IQR<br>8.1, 3.9 – 11.2                                       | Estimates of admissions to ICU 41.9 % (34.1 – 51.4 %)<br>Estimates for ICU fatalities 17.8 % (14.3 – 22.2 %)                 | Adjusted for censored data hence estimates calculated.                                                                                                                                                      |
| <b>Mexico</b>                     |                                     |                        |                                                                                                                                                                                                                                                                                         |                                                                    |                                                                                                                              |                                                                                                                                                                                                             |
| Valente Acosta et al., 2020       | Mexico City                         | 13MAR2020 to 13APR2020 | 33 patients. Mean age 60.6 ± 12.7 years, 23 (70 %) male. 23 (70 %) overweight or obese.                                                                                                                                                                                                 | 7.5, 4.25–8.75 Severe n= 20<br>23, 16–24.75 Critical n = 4         | All survived to study cutoff. 20 of 28 severe discharged; 4 of 8 critical discharged                                         | 91 % swab positive. All admitted to ICU                                                                                                                                                                     |

862

863

864

865  
866  
867  
868  
869  
870  
871  
872  
873  
874  
875  
876  
877  
878  
879  
880  
881  
882  
883  
884  
885  
886  
887  
888  
889

890

Table 4. A summary of published articles and reports relating to length of hospital stay prior to transfer to ICU following COVID-19 infection, by country.

| Paper                          | Location     | Timing                 | Demographics                                                                                                                                                    | Pre-ICU; LOS median (days), IQR                                                       | Outcomes                                                                                      | Comments                                                                                        |
|--------------------------------|--------------|------------------------|-----------------------------------------------------------------------------------------------------------------------------------------------------------------|---------------------------------------------------------------------------------------|-----------------------------------------------------------------------------------------------|-------------------------------------------------------------------------------------------------|
| <b>China</b>                   |              |                        |                                                                                                                                                                 |                                                                                       |                                                                                               |                                                                                                 |
| Fan et al., 2020 Pre-print     | Wuhan China  | 30DEC2019 to 16FEB2020 | 101 patients, mean age 65.5 years (range 24 to 83). 64 males, 37 females. All died. Majority with underlying conditions, 25.7 % with two underlying conditions. | 47 of 101 direct to ICU:54 transferred to ICU with aggravating conditions 8, 4 to 11. | All died – criteria for inclusion was death                                                   | Early paper - 57 patients lab confirmed, 44 clinically consistent                               |
| <b>Singapore</b>               |              |                        |                                                                                                                                                                 |                                                                                       |                                                                                               |                                                                                                 |
| Young et al., 2020 Case series | Singapore    | To 25FEB2020           | 18 patients. Median age was 47 yrs, 50 % male, 50 % female                                                                                                      | Mean 6 (range 5 – 7)                                                                  | No deaths                                                                                     | 2 patients ICU Main presentation mild respiratory infection                                     |
| <b>UK</b>                      |              |                        |                                                                                                                                                                 |                                                                                       |                                                                                               |                                                                                                 |
| ICNARC, 2020a 08MAY2020        | UK           | Up to 08MAY2020        | 8,250 Patients. Age 60, 51 – 67. 5,879 (72%) Male. 5,580 of 7,594 (73 %) patients had BMI ≥ 25.                                                                 | 1, 0 to 3 Pre ICU LOS, n = 8,233                                                      | 6,143 of 8,250 completed ICU care: 3,271 of 6,143 (55 %) alive 2,872 of 6,143 (47 %) died     | 4,861 of 8,250 (64% mechanical ventilation within 24 hrs APACHE II score 14, 11 – 18; n = 7,835 |
| <b>USA</b>                     |              |                        |                                                                                                                                                                 |                                                                                       |                                                                                               |                                                                                                 |
| Kujawski et al., 2020          | USA 6 States | 20JAN2020 to 05FEB2020 | 12 patients. Median age 53 yrs (range 21 to 68). 8 male. 4 of 5 with one or more underlying conditions hospitalised                                             | 5 days                                                                                | 11 of 12 discharged or remained home isolation 1 remained hospitalized at study cut off (ICU) | 1 patient ICU Hospitalised patients worsened clinically in second week.                         |
